# Supplementary material for: Epigenetic Reprogramming of Kaposi’s Sarcoma-Associated Herpesvirus during Hypoxic Reactivation
Source: MDPI journal article supplement (doi:10.3390/cancers14215396), 2022-11-02
Supplement: s1 [file s1]

Confirmation of hypoxic induction in BC3 cells and validation of the ChIP-seq data for non-specific binding

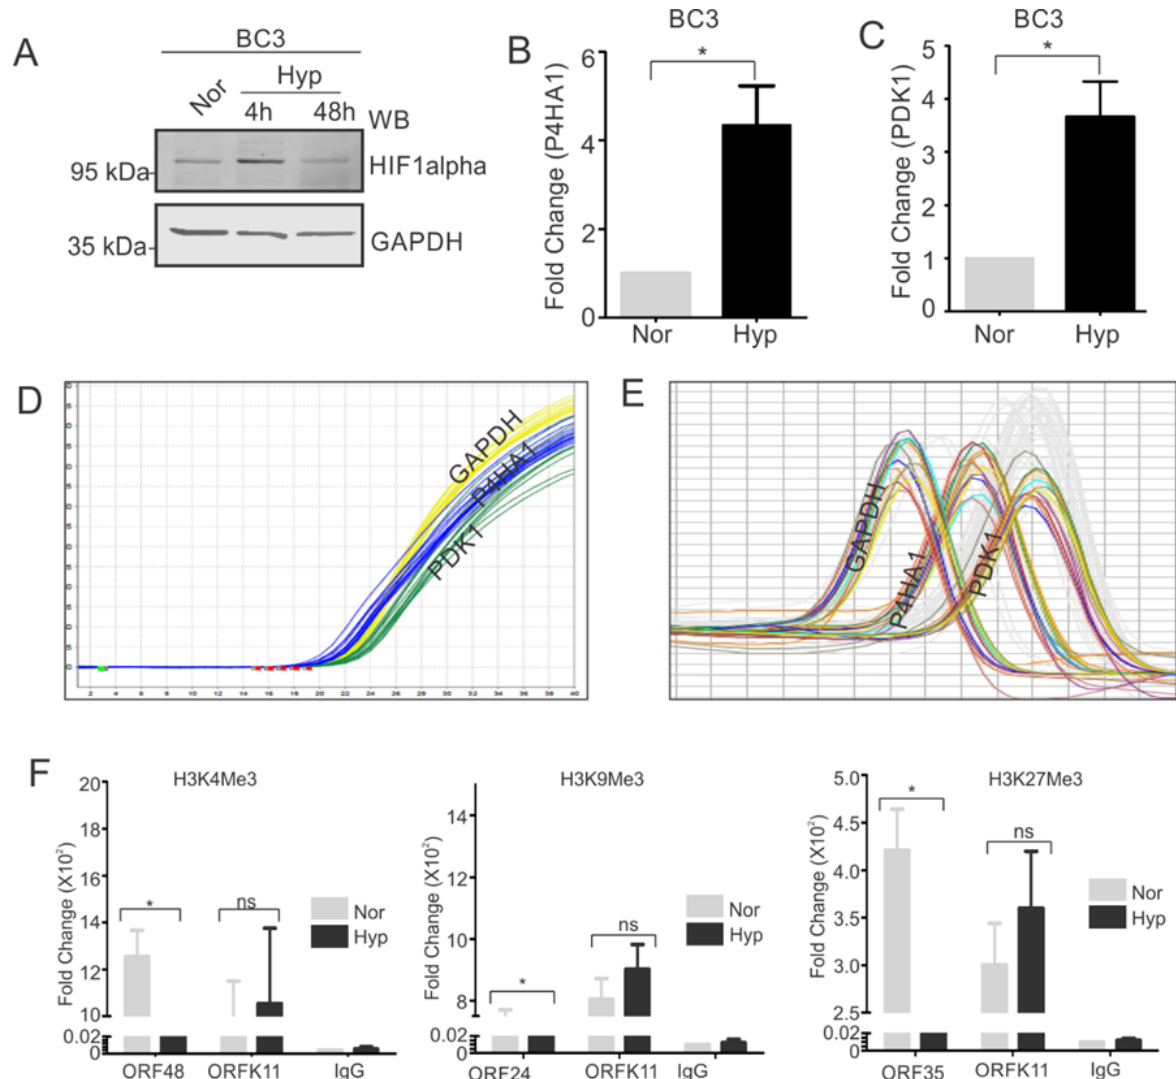

**Figure S1. Confirmation of hypoxic induction in cells growing under 1%O<sub>2</sub> condition.** (A) HIF1 alpha Western blot analysis in BC3 cell. Cells were grown either in normoxic condition or 1% O<sub>2</sub> for 4 and 48 hours. Equal amount of protein was used to blot for HIF1 alpha. GAPDH served as loading control. (B and C) Real-time PCR based confirmation of hypoxia by measuring transcripts of P4HA1 and PDK1 in cells grown under normoxic or hypoxic condition. (D and E) amplification plot and melt curve for the representative set of real-time PCR for P4HA1, PDK1 and GAPDH. (F) ChIP-qPCR for results shown in figure 1A-D in the regions that either remained unchanged or reduced in occupancy. The P value of <0.05 was considered statistically significant. ns, not significant; \*, P value < 0.05; \*\*, P value < 0.01; \*\*\*, P value < 0.005.

## Confirmation of hypoxic induction in cells growing under 1%O<sub>2</sub> condition

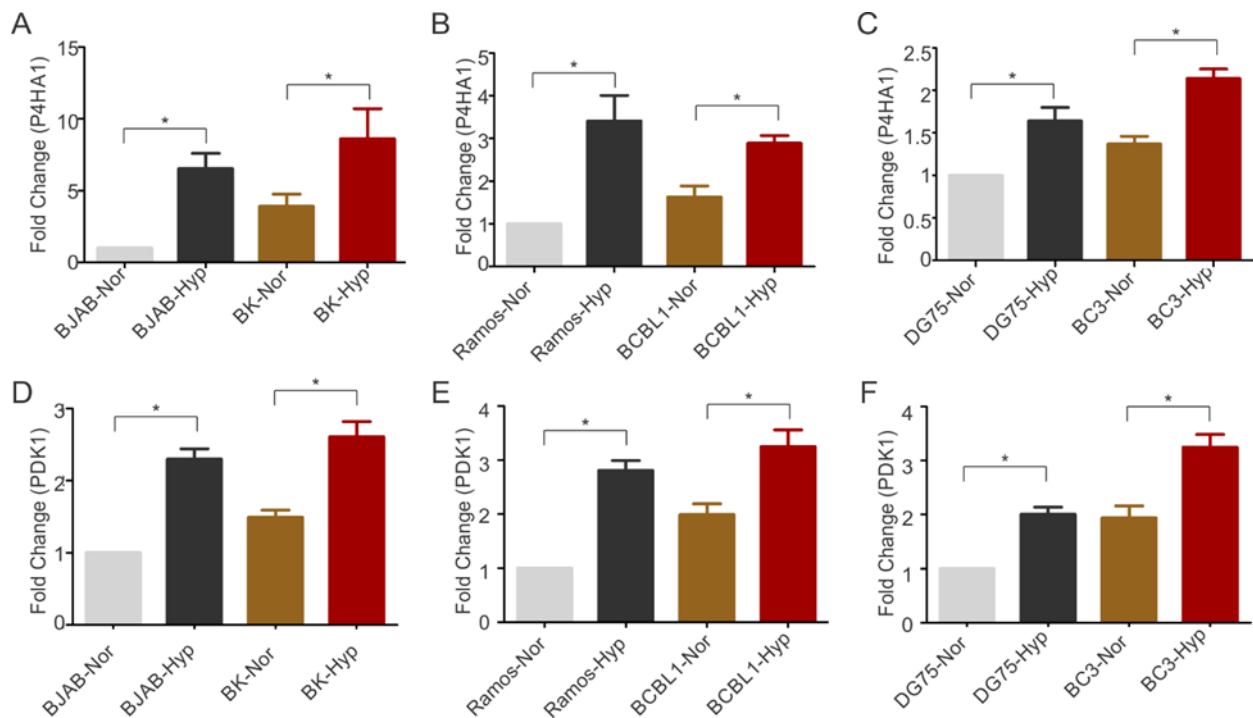

**Figure S2. Confirmation of hypoxic induction in cells growing under 1%O<sub>2</sub> condition.** (A-F) Real-time PCR based confirmation of hypoxia by measuring transcripts of P4HA1 and PDK1 in BJAB, BJAB-KSHV, Ramos, BCBL1, DG75 and BC3 cells. The P value of <0.05 was considered statistically significant. NS, not significant; \*, P value < 0.05; \*\*, P value < 0.01; \*\*\*, P value < 0.005.

**Table S1.** List of primers used to validate ChIP-Sequencing results by ChIP-qPCR.

| <b>Gene</b> | <b>Forward Primer (5'-3')</b> | <b>Reverse Primer (5'-3')</b> |
|-------------|-------------------------------|-------------------------------|
| ORF6        | ACCTCTATGCCTATGTGACA          | CTTTACATTTAAGGGGAAAT          |
| ORF34       | CCTCTTGTTTCCAACGTGA           | CCGCCGCCCCGAAACCCTGC          |
| ORFK12      | ATGGATAGAGGCTTAACGGT          | CCACGCTGGCCACTCGGGGG          |
| ORF26       | GGGGTGCGTATGCTCACGTG          | GAAGGTTGTCAGAGGGATCC          |
| ORF29       | GCCTATTGGAGTCCCTATCA          | GCGGTAGACAGAGCAGGCGT          |
| ORF61       | CAGGTCCCTAAGATAGCTCG          | TCCTAACAGCCTTTGATTAC          |
| ORFK6       | GCGCGGGGTCACTCGTGTCG          | CTTGGTCAGCAAAATAACTC          |
| ORF73       | CCGCAACACCTTTACCTCCA          | TGGAGACTGCGTGGGTGGCA          |
