# Supplementary material for: Epigenetic Reprogramming of Kaposi’s Sarcoma-Associated Herpesvirus during Hypoxic Reactivation
Source: Cancers (Basel). 2022 Nov 2;14(21):5396. doi: 10.3390/cancers14215396 (PMC9654037; doi:10.3390/cancers14215396)
Supplement: Supplementary file 1 [file cancers-14-05396-s001.zip]

Archive with 14 entries (14 files):
- Ac-H3 Hypoxia.xls
- Ac-H3 Normoxia.xls
- cancers-1924915-File S1.pdf
- cancers-1924915-supplementary.pdf
- H3K27Me3 Hypoxia.xls
- H3K27Me3 Normoxia.xls
- H3K4Me3 Hypoxia.xls
- H3K4Me3 Normoxia.xls
- H3K9Me3 Hypoxia.xls
- H3K9Me3 Normoxia.xls
- LANA Hypoxia.csv
- LANA Normoxia.csv
- RTA Hypoxia.csv
- RTA Normoxia.csv
