# Supplementary material for: Epigenetic Reprogramming of Kaposi’s Sarcoma-Associated Herpesvirus during Hypoxic Reactivation
Source: Cancers (Basel). 2022 Nov 2;14(21):5396. doi: 10.3390/cancers14215396 (PMC9654037; doi:10.3390/cancers14215396)
Supplement: Supplementary file 1 [file cancers-14-05396-s001.zip › Ac-H3 Hypoxia.xls]

## Sheet: Tmp export tabular
Chromosome	Region	Name	gene	locus_tag	function	note	codon_start	product	protein_id	GeneID	translation	Peak shape score	P-value
NC_009333	105..944	K1	K1	HHV8GK18_gp01		ITAM-containing signal transducing membrane glycoprotein; contains an Ig domain	1	K1	YP_001129350.1	4961511	MFLYVVCSLAVCFRGLLSLSLQSSPNLCPGVISTPYTLTCPSNT SLPTSWYCNDTRLLRVTQGTLTVDTLICNFSCVGQSGHRYSLWITWYAQPVLQTFCGQ PSNTVTCGQHVTLYCSTSGNNVTVWHLPNGQNETVSQTKYYNFTLMNQTEGCYACSNG LSSRLSNRLCFSARCANITPETHTVSVSSTTGFRTFATAPTLFVMKEVKSTYLYIQEH LLVFMTLVALIGTMCGILGTIIFAHCQKQRDSNKTVPQQLQDYYSLHDLCTEDYTQPV DWY	13.2477	2.32748e-40
NC_009333	1112..2764	ORF4	ORF4	HHV8GK18_gp02		complement control protein; membrane protein; contains four SCR domains	1	KCP	YP_001129351.1	4961488	MAFLRQTLWILWTFTMVIGQDNEKCSQKTLIGYRLKMSRDGDIA VGETVELRCRSGYTTYARNITATCLQGGTWSEPTATCNKKSCPNPGEIQNGKVIFHGG QDALKYGANISYVCNEGYFLVGREYVRYCMIGASGQMAWSSSPPFCEKEKCHRPKIEN GDFKPDKDYYEYNDAVHFECNEGYTLVGPHSIACAVNNTWTSNMPTCELAGCKFPSVT HGYPIQGFSLTYKHKQSVTFACNDGFVLRGSPTITCNVTEWDPPLPKCVLEDIDDPNN SNPGRLHPTPNEKPNGNVFQRSNYTEPPTKPEDTHTAATCDTNCEQPPKILPTSEGFN ETTTSNTITKQLEDEKTTSQPNTHITSALTSMKAKGNFTNKTNNSTDLHIASTPTSQD …	17.887	7.44957e-72
NC_009333	3179..6577	ORF6	ORF6	HHV8GK18_gp03		single-stranded DNA-binding protein; herpesvirus core gene UL29 family	1	ORF6	YP_001129352.1	4961521	MALKGPQTLEENIGSAAPTGPCGYLYAYVTHNFPIGEASLLGNG YPEAKVFSLPLLHGLTVESDFPLNVKAVHKKIDATTASVKLTSYHREAIVFHNTHLFQ PIFQGKGLEKLCRESRELFGFSTFVEQQHKGTLWSPEACPQLPCANEIFMAVIVTEGF KERLYGGKLVPVPSQTTPVHIGEHQAFKIPLYDEDLFGPSRAQELCRFYNPDISRYLH DSIFTGIAQALRVKDVSTVIQASERQFVHDQYKIPKLVQAKDFPQCASRGTDGSTLMV IDSLVAELGMSYGLSFIEGPQDSCEVLNYDTWPIFENCETPDARLRALEVWHAEQALH IGAQLFAANSVLYLTRVAKLPQKNQRGDANMYNSFYLQHGLGYLSEATVKENGASAFK …	4.66319	1.5567e-06
NC_009333	6594..8681	ORF7	ORF7	HHV8GK18_gp04		subunit of terminase; herpesvirus core gene UL28 family	1	ORF7	YP_001129353.1	4961505	MAKELAAVYADVSALAMDLCLLSYADPATLDTKSLALTTGKFQS LHGTLLPLLRRQNAHECSGLSLELEHLLENVADALTTLGVCTSRKLSPEEHFSLLHLD ITCNKHRSVRFNFYGNWALELKLSLINDVEIFFKRLSSVFYCIGSGSALEGLGEVLRF VGKLRGISPVPGPDLYVSNLPCLECLQEVCLTPNQGTSLQAMLPDTACSHICTPACGE PVRGLFENELKQLGLQTPESIPTTPCQSRVRQDDEIRQSSLMAVGDHHIFGEVTRSVL EISNLIYWSSGHSDATCDGDRDCSHLASLFTHEADMHKRRVDLAGCLGERGTPKHFFD CFRPDSLETLFCGGLFSSVEDTIESLQKDCSSAFYQQVNYTTALQKQNEFYVRLSKLL …	3.03967	0.0011842
NC_009333	8665..11202	ORF8	ORF8	HHV8GK18_gp05		envelope glycoprotein gB; herpesvirus core gene UL27 family	1	ORF8	YP_001129354.1	4961501	MTPRSRLATLGTVILLVCFCAGAAHSRGDTFQTSSSPTPPGSSS KAPTKPGEEASGPKSVDFYQFRVCSASITGELFRFNLEQTCPDTKDKYHQEGILLVYK KNIVPHIFKVRRYRKIATSVTVYRGLTESAITNKYELPRPVPLYEISHMDSTYQCFSS MKVNVNGVENTFTDRDDVNTTVFLQPVEGLTDNIQRYFSQPVIYAEPGWFPGIYRVRT TVNCEIVDMIARSAEPYNYFVTSLGDTVEVSPFCYNESSCSTTPSNKNGLSVQVVLNH TVVTYSDRGTSPTPQNRIFVETGAYTLSWASESKTTAVCPLALWKTFPRSIQTTHEDS FHFVANEITATFTAPLTPVANFTDTYSCLTSDINTTLNASKAKLASTHVPNGTVQYFH …	1.66841	0.0476173
NC_009333	11329..14367	ORF9	ORF9	HHV8GK18_gp06		DNA polymerase catalytic subunit; herpesvirus core gene UL30 family	1	ORF9	YP_001129355.1	4961513	MDFFNPFIDPTRGGPRNTVRQPTPSQSPTVPSETRVCRLIPACF QTPGRPGVVAVDTTFPPTYFQGPKRGEVFAGETGSIWKTRRGQARNAPMSHLIFHVYD IVETTYTADRCEDVPFSFQTDIIPSGTVLKLLGRTLDGASVCVNVFRQRCYFYTLAPQ GVNLTHVLQQALQAGFGRASCGFSTEPVRKKILRAYDTQQYAVQKITLSSSPMMRTLS DRLTTCGCEVFESNVDAIRRFVLDHGFSTFGWYECSNPAPRTQARDSWTELEFDCSWE DLKFIPERTEWPPYTILSFDIECMGEKGFPNATQDEDMIIQISCVLHTVGNDKPYTRM LLGLGTCDPLPGVEVFEFPSEYDMLAAFLSMLRDYNVEFITGYNIANFDLPYIIARAT …	1.81445	0.0348045
NC_009333	complement(17227..17841)	K2	K2	HHV8GK18_gp10		interleukin-6; vIL-6	1	K2	YP_001129358.1	4961449	MRWFKLWSILLVGSLLVSGTRGKLPDAPEFEKDLLIQRLNWMLW VIDECFRDLCYRTGICKGILEPAAIFHLKLPAINDTDHCGLIGFNETSCLKKLADGFF EFEVLFKFLTTEFGKSVINVDVMELLTKTLGWDIQEELNKLTKTHYSPPKFDRGLLGR LQGLKYWVRHFASFYVLSAMEKFAGQAVRVLNSIPDVTPDVHDK	4.11482	1.93738e-05
NC_009333	complement(18574..19542)	K3	K3	HHV8GK18_gp11	downregulation of MHC-I	E3 ubiquitin ligase; membrane protein; related to K5; MIR1; ORF12	1	K3	YP_001129360.1	4961486	MEDEDVPVCWICNEELGNERFRACGCTGELENVHRSCLSTWLTI SRNTACQICGVVYNTRVVWRPLREMTLLPRLTYQEGLELIVFIFIMTLGAAGLAAATW VWLYIVGGHDPEIDHVAAAAYYVFFVFYQLFVVFGLGAFFHMMRHVGRAYAAVNTRVE VFPYRPRPTSPECAVEEIELQEILPRGDNQDEEGPAGAAPGDQDGPADGAPVHRDSEE SVDEAAGYKEAGEPTHNDGRDDNVEPTAVGCDCNNLGAERYRATYCGGYVGAQSGDGA YSVSCHNKAGPSSLVDILPQGLLGGGYGSMGVIRKRSAVSSALMFH	3.08805	0.00100738
NC_009333	complement(22530..23078)	K4.2	K4.2	HHV8GK18_gp14		contains hydrophobic domains	1	K4.2	YP_001129364.1	4961450	MQISFAEVLGKPVGRAGFLDRGKWDRCPLYDLFSHLATSATFSG TASGFGAVSGVLPGSCSGIAWSIKPGNYDPLIPFETLMTWDIGSKNPRLTKYWTLLTT SAAPGVSPVSSCFVFGGGGRGECLVSVLLLFFCVCTFGCFGKPYRCAIFWVIHKLHLA TLVFIVAFGEEKRGDPWSPGLQ	10.3979	1.26744e-25
NC_009333	complement(25865..26635)	K5	K5	HHV8GK18_gp16	downregulation of MHC-I	E3 ubiquitin ligase; membrane protein; related to K3; MIR2	1	K5	YP_001129365.1	4961442	MASKDVEEGVEGPICWICREEVGNEGIHPCACTGELDVVHPQCL STWLTVSRNTACQMCRVIYRTRTQWRSRLNLWPEMERQEIFELFLLMSVVVAGLVGVA LCTWTLLVILTAPAGTFSPGAVLGFLCFFGFYQIFIVFAFGGICRVSGTVRALYAANN TRVTVLPYRRPRRPTANEDNIELTVLVGPAGGTDEEPTDESSEGDVASGDKERDGSSG DEPDGGPNDRAGLRGTARTDLCAPTKKPVRKNHPKNNG	4.1799	1.45817e-05
NC_009333	complement(30920..31786)	ORF17.5	ORF17.5	HHV8GK18_gp21		major capsid scaffold protein; herpesvirus core gene UL26.5 family	1	ORF17.5	YP_001129370.1	4961482	MNSSGQEDIISIPKSAFLSMLQSSIDGMKTTAAKMSHTLSGPGL MGCGGQMFPTDHHLPSYVSNPAPPYGYAYKNPYDPWYYSPQLPGYRTGKRKRGAEDDE GHLFPGEEPAYHKDILSMSKNIAEIQSELKEMKLNGWHAGPPPSSSAAAAAVDPHYRP HANSAAPCQFPTMKEHGGTYVHPPIYVQAPHGQFQQAAPILFAQPHVSHPPVSTGLAV VGAPPAEPTPASSTQSIQQQAPETTHTPCAAVEKDAPTPNPTSNRVEASSRSSPKSKI RKMFCEELLNKQ	1.73177	0.0416572
NC_009333	complement(30920..32524)	ORF17	ORF17	HHV8GK18_gp20		capsid maturational protease; minor capsid scaffold protein; herpesvirus core gene UL26 family	1	ORF17	YP_001129369.1	4961478	MAQGLYVGGFVDVVSCPKLEQELYLDPDQVTDYLPVTEPLPITI EHLPETEVGWTLGLFQVSHGIFCTGAITSPAFLELASRLADTSHVARAPVKNLPKEPL LEILHTWLPGLSLSSIHPRELSQTPSGPVFQHVSLCALGRRRGTVAVYGHDAEWVVSR FSSVSKSERAHILQHVSSCRLEDLSTPNFVSPLETLMAKAIDASFIRDRLDLLKTDRG VASILSPAYLKASQFPVGIQAVTPPRPAMNSSGQEDIISIPKSAFLSMLQSSIDGMKT TAAKMSHTLSGPGLMGCGGQMFPTDHHLPSYVSNPAPPYGYAYKNPYDPWYYSPQLPG YRTGKRKRGAEDDEGHLFPGEEPAYHKDILSMSKNIAEIQSELKEMKLNGWHAGPPPS …	1.80186	0.0357837
NC_009333	35482..37224	ORF21	ORF21	HHV8GK18_gp25		thymidine kinase; herpesvirus core gene UL23 family	1	ORF21	YP_001129374.1	4961484	MAEGGFGADSVGRGGEKASVTRGGRWDLGSSDDESSTSTTSTDM DDLPEERKPLTGKSVKTSYIYDVPTVPTSKPWHLMHDNSLYATPRFPPRPLIRHPSEK GSIFASRLSATDDDSGDYAPMDRFAFQSPRVCGRPPLPPPNHPPPATRPADASMGDVG WADLQGLKRTPKGFLKTSTKGGSLKARGRDVGDRLRDGGFAFSPRGVKSAIGQNIKSW LGIGESSATAVPVTTQLMVPVHLIRTPVTVDYRNVYLLYLEGVMGVGKSTLVNAVCGI LPQERVTSFPEPMVYWTRAFTDCYKEISHLMKSGKAGDPLTSAKIYSCQNKFSLPFRT NATAILRMMQPWNVGGGSGRGTHWCVFDRHLLSPAVVFPLMHLKHGRLSFDHFFQLLS …	2.09388	0.0181351
NC_009333	37212..39404	ORF22	ORF22	HHV8GK18_gp26		envelope glycoprotein gH; herpesvirus core gene UL22 family	1	ORF22	YP_001129375.1	4961506	MQGLAFLAALACWRCISLTCGATGALPTTATTITRSATQLINGR TNLSIELEFNGTSFFLNWQNLLNVITEPALTELWTSAEVAEDLRVTLKKRQSLFFPNK TVVISGDGHRYTCEVPTSSQTYNITKGFNYSALPGHLGGFGINARLVLGDIFASKWSL FARDTPEYRVFYPMNVMAVKFSISIGNNESGVALYGVVSEDFVVVTLHNRSKEANETA SHLLFGLPDSLPSLKGHATYDELTFARNAKYALVAILPKDSYQTLLTENYTRIFLNMT ESTPLEFTRTIQTRIVSIEARRACAAQEAAPDIFLVLFQMLVAHFLVARGIAEHRFVE VDCVCRQYAELYFLRRISRLCMPTFTTVGYNHTTLGAVAATQIARVSATKLASLPRSS …	1.87098	0.0306737
NC_009333	complement(40619..42877)	ORF24	ORF24	HHV8GK18_gp27		related to HHV-5 UL87	1	ORF24	YP_001129377.1	4961485	MAALEGPLLLPPSASLTTSPQTTCYQATWESQLEIFCCLATNSH LQAELTLEGLDKMMQPEPTFFACRAIRRLLLGERLHPFIHQEGTLLGKVGRRYSGEGL IIDGGGVFTRGQIDTDNYLPAVGSWELTDDCDKPCEFRELRSLYLPALLTCTICYKAM FRIVCRYLEFWEFEQCFHAFLAVLPHSLQPTIYQNYFALLESLKHLSFSIMPPASPDA QLHFLKFNISSFMATWGWHGELVSLRRAIAHNVERLPTVLKNLSKQSKHQDVKVNGRD LVGFQLALNQLVSRLHVKIQRKDPGPKPYRVVVSTPDCTYYLVYPGTPAIYRLVMCMA VADCIGHSCSGLHPCANFLGTHETPRLLAATLSRIRYAPKDRRAAMKGNLQACFQRYA …	2.03268	0.0210422
NC_009333	47973..48845	ORF27	ORF27	HHV8GK18_gp31			1	ORF27	YP_001129380.1	4961487	MASSDILSVARTDDGSVCEVSLRGGRKKTTVYLPDTEPWVVETD AIKDAFLSDGIVDMARKLHRGALPSNSHNGLRMVLFCYCYLQNCVYLALFLCPLNPYL VTPSSIEFAEPVVAPEVLFPHPAEMSRGCDDAIFCKLPYTVPIINTTFGRIYPNSTRE PDGRPTDYSMALRRAFAVMVNTSCAGVTLCRGETQTASRNHTEWENLLAMFSVIIYAL DHNCHPEALSIASGIFDERDYGLFISQPRSVPSPTPCDVSWEDIYNGTYLARPGNCDP WPNLSTPPLILNFK	4.16289	1.57121e-05
NC_009333	50723..50956	ORF30	ORF30	HHV8GK18_gp34		related to HHV-5 UL91	1	ORF30	YP_001129383.1	4961433	MGEPVDPGHVVNEKDFEECEQFFSQPLREQVVAGVRALDGLGLA DSLCHKTERLCLLMDLVGTECFARVCRLDTGAK	3.53224	0.000206024
NC_009333	50953..51537	ORF31	ORF31	HHV8GK18_gp35		related to HHV-5 UL92	1	ORF31	YP_001129384.1	4961498	MKSVASPLCQFHGVFCLYQCRQCLAYHVCDGGAECVLLHTPESV ICELTGNCMLGNIQEGQFLGPVPYRTLDNQVDRDAYHGMLACLKRDIVRYLQTWPDTT VIVQEIALGDGVTDTISAIIDETFGECLPVLGEAQGGYALVCSMYLHVIVSIYSTKTV YNSMLFKCTKNKKYDCIAKRVRTKWMRMLSTKDT	2.0043	0.0225188
NC_009333	54774..55757	ORF34	ORF34	HHV8GK18_gp38		related to HHV-5 UL95	1	ORF34	YP_001129387.1	4961504	MFALSSLVSEGDPEVTSRYVKGVQLALDLSENTPGQFKLIETPL NSFLLVSNVMPEVQPICSGLPALRPDFSNLHLPRLEKLQRVLGQGFGAAGEEIALDPS HVETHEKGQVFYNHYATEEWTWALTLNKDALLREAVDGLCDPGTWKGLLPDDPLPLLW LLFNGPASFCRADCCLYKQHCGYPGPVLLPGHMYAPKRDLLSFVNHALKYTKFLYGDF SGTWAAACRPPFATSRIQRVVSQMKIIDASDTYISHTCLLCHIYQQNSIIAGQGTHVG GILLLSGKGTQYITGNVQTQRCPTTGDYLIIPSYDIPAIITMIKENGLNQL	1.88273	0.0298682
NC_009333	55738..56190	ORF35	ORF35	HHV8GK18_gp39		tegument protein; herpesvirus core gene UL14 family	1	ORF35	YP_001129388.1	4961512	MDSTNSKREFIKSALEANINRRAAVSLFDRFGGSSAVFEKQFQD AQHAVRAHGALKREAELGTLVRKAGQRFEALKRERSILRQPRDLPRVADIDALVDAVA DLKEEVAVRLDALEENGEETPTHSSSEIKDTIVRWRLDDLPPVCPETP	4.11754	1.91468e-05
NC_009333	58787..58972	ORF38	ORF38	HHV8GK18_gp42		myristylated tegument protein anchored in envelope; herpesvirus core gene UL11 family	1	ORF38	YP_001129391.1	4961435	MGFLLSICKRPSQPVDVDGEPLDVVVDYDPIRVSEKGMLLEQSQ SPYPALKKKKKNKEAIY	67.637	0
NC_009333	complement(59072..60274)	ORF39	ORF39	HHV8GK18_gp43		envelope glycoprotein gM; herpesvirus core gene UL10 family	1	ORF39	YP_001129392.1	4961437	MRASKSDRFLMSSWVKLLFVAVIMYICSAVVPMAATYEGLGFPC YFNNLVNYSALNLTVRNSAKHLTPTLFLEKPEMLVYIFWTFIVDGIAIVYYCLAAVAV YRAKHVHATTMMSMQSWIALLGSHSVLYVAILRMWSMQLFIHVLSYKHVLMAAFVYCI HFCISFAHIQSLITCNSAQWEIPLLEQHVPDNTMMESLLTRWKPVCVNLYLSTTALEM LLFSLSTMMAVGNSFYVLVSDAIFGAVNMFLALTVVWYINTEFFLVKFMRRQVGFYVG VFVGYLILLLPVIRYENAFVQANLHYIVAINISCIPILCILAIVIRVIRSDWGLCTPS AAYMPLATSAPTVDRTPTVHQKPPPLPAKTRARAKVKDISTPAPRTQYQSDHESDSEI …	2.1901	0.0142583
NC_009333	complement(62535..63371)	ORF42	ORF42	HHV8GK18_gp46		tegument protein; herpesvirus core gene UL7 family	1	ORF42	YP_001129394.1	4961440	MSLERALARLTGVPMSTHAPKTRESEEACPVYPHPVVPRLVLEV HRKNNALVGSNTPKMSVMGHLDIACLREHVKSRLSSPNFVGFTVVCLVEHEDMVTHID LHPHVFQERVCLLRPTSPGITELCCLLSMLENCRDMSPTFLRSIICRARKTHERTPGM DAAFVMHGIETLTATAAFVYELSVDDHFRATPLVMFKLHKAIGDASTPMGGLMKPIYL ESFKLESSGENEDDKQTCADPVNIFYCDTIFTKHLENNEVLKYLKMCTLFKPPIVSLF SK	6.51888	3.54166e-11
NC_009333	complement(67452..68675)	ORF45	ORF45	HHV8GK18_gp51	inhibition of IRF-7	virion phosphoprotein	1	ORF45	YP_001129397.1	4961474	MAMFVRTSSSTHDEERMLPIEGAPRRRPPVKFIFPPPPLSSLPG FGRPRGYAGPTVIDMSAPDDVFAEDTPSPPATPLDLQISPDQSSGESEYDEDEEDEDE EENDDVQEEDEPEGYPADFFQPLSHLRPRPLARRAHTPKPVAVVAGRVRSSTDTAESE ASMGWVSQDDGFSPAGLSPSDDEGVAILEPMAAYTGTGAYGLSPASRNSVPGTQSSPY SDPDEGPSWRPLRAAPTAIVDLTSDSDSDDSSNSPDVNNEAAFTDARHFSHQPPSSEE DGEDQGEVLSQRIGLMDVGQKRKRQSTASSGSEDVVRCQRQPNLSRKAVASVIIISSG SDTDEEPSSAVSVIVSPSSTKGHLPTQSPSTSAHSISSGSTTTAGSRCSDPTRILAST …	6.64239	1.54323e-11
NC_009333	complement(70272..71480)	ORF48	ORF48	HHV8GK18_gp48			1	ORF48	YP_001129400.1	4961458	MEVCIPIPGIGDENCESWRAQIVAFGTTSGFVKTERILRGLFPE RGHPGFLASLVVLKHTLASPGGLNTRLNLLPVLQMLKYVGQEMYMRAKCQATASDMTL IWDDCKDRFMLILEQACGCHQCMTVVEEITHCSAISAPPSSLSHGRHILSAGLINFAR RQVLLGGSVSFSEFSIPDLIQTPEQYPFVDVEFRRELSLISSCLNVCWLYHIFIEHIT SDVRRLESCMASVLEEYGGLSPTRPWAEAVTFLSQLPRPTRKPWKELSVSRINVEARL LDTLVMQLEKPVPVEIIKHALAILGTAGHVWNPEHQLACPDTRTCRERVSKGPCVGDG DVTLVHTARMDISNPSSVSPDGDVHYSGPPRTPAYGVVLECADDSDDSLDDFLENLSQ …	2.49357	0.00632325
NC_009333	complement(71729..72637)	ORF49	ORF49	HHV8GK18_gp53			1	ORF49	YP_001129402.1	4961448	MTSRRPLKDHLFNHLFRYHYPSWDQILQELDTLSVATLNPDCHV PALNVEKTLYLAKTIQILVQHRQSEPYLVPAARANLAYSLQQLYKLGNDKIRGVINGM LPLVDAGCIGFERELIKGLPRVLTLQYPHTAPLESEPPTADCTEWCLSHFVGASGRLR SEVRDILTTHNGTCAPSFQWMASVVKKFFLVETVIYEDFQDTDFNVQLNLCFFWTAVV QMYQRCIYEQKLVHIISTSLTLLKSTARSFFAWYDLYRPNLGSAALVKYTEHLIRALT PDCSDVELGELCSHLHHCKHALFSIQ	2.43916	0.0073608
NC_009333	join(74949..75662,75744..75890)	K8	K8	HHV8GK18_gp54	switch from latent to lytic infection (putative)	bZIP transcription factor	1	K8	YP_001129403.1	4961462	MPRMKDIPTKSSPGTDNSEKDEAVIEEDLSLNGQPFFTDNTDGG ENEVSWTSSLLSTYVGCQPPAIPVCETVIDLTAPSQSGAPGDEHLPCSLNAETKFHIP DPSWTLSHTPPRGPHISQQLPTRRSKRRLHRKFEEERLCTKAKQGAGRPVPASVVKVG NITPHYGEELTRGDAVPAAPITPPYPRVQRPAQPTHVLFSPVFVSLKAEVCDQSHSPT RKQGRYGRVSSKAYTRQLQQALEEKDAQLCFLAARLEAHKEQIIFLRDMLMRMCQQPA SPTDAPLPPC	2.39727	0.00825895
NC_009333	complement(77432..77764)	ORF53	ORF53	HHV8GK18_gp57		envelope glycoprotein gN; herpesvirus core gene UL49A family	1	ORF53	YP_001129406.1	4961468	MTASTVALALFVASILGHCWVTANSTGVASSTERSSPSTAGLSA RPSPGPTSVTTPGFYDVACSADSFSPSLSSFSSVWALINALLVVVATFFYLVYLCFFK FVDEVVHA	4.55954	2.56328e-06
NC_009333	79535..82066	ORF56	ORF56	HHV8GK18_gp60		primase subunit of helicase-primase complex; herpesvirus core gene UL52 family	1	ORF56	YP_001129409.1	4961445	METTYRREALTVRVIFCTSGDSAETIADVLTGAPTSASFFSVLH DLFYSQILAPRVTLKLCLPARRPGNGTRCSPVLVLRTDASVASGFLGGRPLEASDIKY MLLSDQTAGLFKPLLEIIGGARAPPNQDACTFQSQVAWLRTKFVTALRKLYKMTPSPY WMLSAFGAQEAQFVLTSSFYFFEHTVVCTTETVSHLSRLFSPQQGQTLVSVTSHEELG QLYGTSPFRRRVPAFVAYVKEKLARDSLETEAIDRTIDQIRGKLMLSNQDLVHFIYIS FYQCLNKRAFLRYSRQTSSSSALRELGEDPQLCGALHGEFRDHVQSYYHKKTYLSTYI DIRYVGGVLPDGYFGGSLVGERCVYWCGQSKDTASLLATISQQVPHLRLQNEFAGMLD …	3.32338	0.000444661
NC_009333	complement(join(89700..90945,91042..91496))	vIRF-3	vIRF-3	HHV8GK18_gp64		interferon regulatory factor	1	vIRF-3	YP_001129413.1	4961493	MAGRRLTWISEFIVGALDSDKYPLVKWLDRSTGTFLAPAARNDV IPLDSLQFFIDFKRECLSKGLHPRDLLGSPITAFGKICTTSRRLRRLPGEEYEVVQGI NCRRWRLLCAEVKECWWCVHARTHLHSGSSLWEILYQHSVRLEKHRRRPRPFVGENSD SSEEDHPAFCDVPVTQTGAESEDSGDEGPSTRHSASGVQPVDDANADSPGSGDEGPST RHSDSQPPPADETTVHTDNVEDDLTLLDKESACALMYHVGQEMDMLMRAMCDEDLFDL LGIPEDVIATSQPGGDTDASGVVTEGSIAASAVGAGVEDVYLAGALEAQNVAGEYVLE ISDEEVDDGAGLPPASRRRPVVGEFLWDDGPRRHERPTTRRIRHRKLRSAYYRVARPP …	2.8731	0.00203234
NC_009333	complement(join(92066..93620,93742..94229))	vIRF-2	vIRF-2	HHV8GK18_gp65		interferon regulatory factor	1	vIRF-2	YP_001129414.1	4961491	MPRYTESEWLTDFIIDALDSGRFWGVGWLDEQKRIFTVPGRNRR ERMPEGFDDFYEAFLEERRRHGLPEIPETETGLGCFGRLLRTANRARQERPFTIYKGK MKLNRWIMTPRPYKGCEGCLVYLTQEPAMKNMLKALFGIYPHDDKHREKALRRSLRKK AQREAARKQAAAVATPTTSSAAEVSSRSQSEDTESSDSENELWVGAQGFVGRDMHSLF FEEPEPSGFGSSGQSSSLLAPDSPRPSTSQVQGPLHVHTPTDLCLPTGGLPSPVIFPH ETQGLLAPPAGQSQTPFSPEGPVPSHVSGLDDCLPMVDHIEGCLLDLLSDVGQELPDL GDLGELLCETASPQGPMQSEGGEEGSTESVSVLPATHPLESSAPGASVMGSGQELPDL …	4.32088	7.77036e-06
NC_009333	complement(96976..97893)	ORF60	ORF60	HHV8GK18_gp67		ribonucleotide reductase small subunit; herpesvirus core gene UL40 family	1	ORF60	YP_001129417.1	4961455	MDSVDRFLYTSDHDGFLALTRETWQNRWFPSQIPLHLDVSHVHQ LSDADKDFYRFLFTFLGMAERLVNFNIEDLVTNFNSHDVAHYYAEQVAMENIHGVVYA NILKIFFNNSRGELLAYAAKIILDPALCEKLEWLHSRVRKATTKAQKILMFLIVEGIY FISSFYSISLCRVRGIMPGVCLANDYISRDELLHTKAASMLYNTMVEIQEKPSHAEVQ ALFREAVNIEIRFIQAKAAGVTLVNVVDIRRFLEATADRILRDIFVPPIFGTPPPEAC PLSYTGSFKAVNFFERDNSDYTTCVTDDL	2.86849	0.00206218
NC_009333	complement(122393..122959)	HHV8GK18_gp80		HHV8GK18_gp80		FLIP-like inhibitor of apoptosis; contains two death effector domains; ORF71; vFLIP	1	K13	YP_001129429.1	4961494	MATYEVLCEVARKLGTDDREVVLFLLNVFIPQPTLAQLIGALRA LKEEGRLTFPLLAECLFRAGRRDLLRDLLHLDPRFLERHLAGTMSYFSPYQLTVLHVD GELCARDIRSLIFLSKDTIGSRSTPQTFLHWVYCMENLDLLGPTDVDALMSMLRSLSR VDLQRQVQTLMGLHLSGPSHSQHYRHTP	2.56349	0.00518126
NC_009333	complement(123042..123815)	HHV8GK18_gp82		HHV8GK18_gp82		cyclin D-like protein; contains two cyclin-like domains; vCyclin	1	ORF72	YP_001129430.1	4961471	MATANNPPSGLLDPTLCEDRIFYNILEIEPRFLTSDSVFGTFQQ SLTSHMRKLLGTWMFSVCQEYNLEPNVVALALNLLDRLLLIKQVSKEHFQKTGSACLL VASKLRSLTPISTSSLCYAAADSFSRQELIDQEKELLEKLAWRTEAVLATDVTSFLLL KLLGGSQHLDFWHHEVNTLITKALVDPKTGSLPASIISAAGCALLVPANVIPQDTHSG GVVPQLASILGCDVSVLQAAVEQILTSVSDFDLRILDSY	2.84629	0.00221161
NC_009333	complement(124057..127446)	HHV8GK18_gp81		HHV8GK18_gp81	maintenance of episomal genome	latent nuclear antigen; component of latency-associated nuclear antigen; LANA; LNA; ORF73	1	LANA	YP_001129431.1	4961527	MAPPGMRLRSGRSTGAPLTRGSCRKRNRSPERCDLGDDLHLQPR RKHVADSVDGRECGPHTLPIPGSPTVFTSGLPAFVSSPTLPVAPIPSPAPATPLPPPA LLPPVTTSSSPIPPSHPVSPGTTDTHSPSPALPPTQSPESSQRPPLSSPTGRPDSSTP MRPPPSQQTTPPHSPTTPPPEPPSKSSPDSLAPSTLRSLRKRRLSSPQGPSTLNPICQ SPPVSPPRCDFANRSVYPPWATESPIYVGSSSDGDTPPRQPPTSPISIGSSSPSEGSW GDDTAMLVLLAEIAEEASKNEKECSENNQAGEDNGDNEISKESQVDKDDNDNKDDEEE QETDEEDEEDDEEDDEEDDEEDDEEDDEEDDEEDDEEEDEEEDEEEDEEEDEEEEEDE …	16.1258	8.40067e-59
NC_009333	129520..130548	HHV8GK18_gp84		HHV8GK18_gp84		G protein-coupled receptor; similar to IL-8 receptor; transforming protein; vGPCR	1	ORF74	YP_001129433.1	4961460	MAAEDFLTIFLDDDESWNETLNMSGYDYSGNFSLEVSVCEMTTV VPYTWNVGILSLIFLINVLGNGLVTYIFCKHRSRAGAIDILLLGICLNSLCLSISLLA EVLMFLFPNIISTGLCRLEIFFYYLYVYLDIFSVVCVSLVRYLLVAYSTRSWPKKQSL GWVLTSAALLIALVLSGDACRHRSRVVDPVSKQAMCYENAGNMTADWRLHVRTVSVTA GFLLPLALLILFYALTWCVVRRTKLQARRKVRGVIVAVVLLFFVFCFPYHVLNLLDTL LRRRWIRDSCYTRGLINVGLAVTSLLQALYSAVVPLIYSCLGSLFRQRMYGLFQSLRQ SFMSGATT	6.34761	1.09345e-10
NC_009333	complement(join(134824..135287,135373..135474,135557..135664,135747..135899,135977..136066,136155..136397,136481..136573,136683..136899))	K15	K15	HHV8GK18_gp85		signal transducing membrane protein; LAMP	1	K15	YP_001129435.1	4961473	MKTLIFFWNLWLWALLVCFWCITLVCVTTNSIDTMASLLVMCIL FVSAINKYTQAISSNNPKWPSSWHLGIIACIVLKLWNLSTTNSVTYACLITTAILSLV TAFLTLIKHCTACKLQLEHGILFTSTFAVLMTNMLVHMSNTWQSSWIFFPISFTLSLP FLYAFATVKTGNIKLVSSVSFICAGLVMGYPVSCCKTHTCTATAAGLSLSSIYLGFTG IISTLHKSWAPPKRGILTFLLLQGGVLTTQTLTTELLAITSTTGNIKGHEILLLVCLI FLWCLYVWQSFNKASLVTGMLHLIAAWSHTGGCVQLVMLLPSGLTRGILTMIICISTL FSTLQGLLVFYLYKEKKVVAVNSYRQRRRRIYTRDQNLHHNDNHLGNNVISPPPLPPF …	13.8638	5.25028e-44
