# Supplementary material for: Epigenetic Reprogramming of Kaposi’s Sarcoma-Associated Herpesvirus during Hypoxic Reactivation
Source: Cancers (Basel). 2022 Nov 2;14(21):5396. doi: 10.3390/cancers14215396 (PMC9654037; doi:10.3390/cancers14215396)
Supplement: Supplementary file 1 [file cancers-14-05396-s001.zip › H3K4Me3 Hypoxia.xls]

"Chromosome","Region","Name","gene","locus_tag","function","note","codon_start","product","protein_id","GeneID","translation","Peak shape score","P-value"
"NC_009333","105..944","K1","K1","HHV8GK18_gp01","","ITAM-containing signal transducing membrane glycoprotein; contains an Ig domain","1","K1","YP_001129350.1","https://www.ncbi.nlm.nih.gov/entrez/query.fcgi?db=gene&cmd=Retrieve&dopt=full_report&list_uids=4961511","MFLYVVCSLAVCFRGLLSLSLQSSPNLCPGVISTPYTLTCPSNT SLPTSWYCNDTRLLRVTQGTLTVDTLICNFSCVGQSGHRYSLWITWYAQPVLQTFCGQ PSNTVTCGQHVTLYCSTSGNNVTVWHLPNGQNETVSQTKYYNFTLMNQTEGCYACSNG LSSRLSNRLCFSARCANITPETHTVSVSSTTGFRTFATAPTLFVMKEVKSTYLYIQEH LLVFMTLVALIGTMCGILGTIIFAHCQKQRDSNKTVPQQLQDYYSLHDLCTEDYTQPV DWY","60.3001466587","0"
"NC_009333","1112..2764","ORF4","ORF4","HHV8GK18_gp02","","complement control protein; membrane protein; contains four SCR domains","1","KCP","YP_001129351.1","https://www.ncbi.nlm.nih.gov/entrez/query.fcgi?db=gene&cmd=Retrieve&dopt=full_report&list_uids=4961488","MAFLRQTLWILWTFTMVIGQDNEKCSQKTLIGYRLKMSRDGDIA VGETVELRCRSGYTTYARNITATCLQGGTWSEPTATCNKKSCPNPGEIQNGKVIFHGG QDALKYGANISYVCNEGYFLVGREYVRYCMIGASGQMAWSSSPPFCEKEKCHRPKIEN GDFKPDKDYYEYNDAVHFECNEGYTLVGPHSIACAVNNTWTSNMPTCELAGCKFPSVT HGYPIQGFSLTYKHKQSVTFACNDGFVLRGSPTITCNVTEWDPPLPKCVLEDIDDPNN SNPGRLHPTPNEKPNGNVFQRSNYTEPPTKPEDTHTAATCDTNCEQPPKILPTSEGFN ETTTSNTITKQLEDEKTTSQPNTHITSALTSMKAKGNFTNKTNNSTDLHIASTPTSQD DATPSIPSVQTPNYNTNAPTRTLTSLHIEEGPSNSTTSEKATASTLSHNSHKNDTGGI YTTLNKTTQLPSTNKPTNSQAKSSTKPRVETHNKTTSNPAISLTDSADVPQRPREPTL PPIFRPPASKNRYLEKQLVIGLLTAVALTCGLITLFHYLFFR","62.08674291","0"
"NC_009333","3179..6577","ORF6","ORF6","HHV8GK18_gp03","","single-stranded DNA-binding protein; herpesvirus core gene UL29 family","1","ORF6","YP_001129352.1","https://www.ncbi.nlm.nih.gov/entrez/query.fcgi?db=gene&cmd=Retrieve&dopt=full_report&list_uids=4961521","MALKGPQTLEENIGSAAPTGPCGYLYAYVTHNFPIGEASLLGNG YPEAKVFSLPLLHGLTVESDFPLNVKAVHKKIDATTASVKLTSYHREAIVFHNTHLFQ PIFQGKGLEKLCRESRELFGFSTFVEQQHKGTLWSPEACPQLPCANEIFMAVIVTEGF KERLYGGKLVPVPSQTTPVHIGEHQAFKIPLYDEDLFGPSRAQELCRFYNPDISRYLH DSIFTGIAQALRVKDVSTVIQASERQFVHDQYKIPKLVQAKDFPQCASRGTDGSTLMV IDSLVAELGMSYGLSFIEGPQDSCEVLNYDTWPIFENCETPDARLRALEVWHAEQALH IGAQLFAANSVLYLTRVAKLPQKNQRGDANMYNSFYLQHGLGYLSEATVKENGASAFK GVPVSALDGSSYTLQHLAYASSFSPHLLARMCYYLQFLPHHKNTNSQSYNVVDYVGTA APSQMCDLCQGQCPAVCINTLFYRMKDRFPPVLSNVKRDPYVITGTAGTYNDLEILGN FATFREREEEGNPVEDAPKYTYWQLCQNITEKLASMGISEGGDALRTLIVDIPSFVKV FKGIDSTVEAELLKFINCMIKNNYNFRENIKSVHHILQFACNVYWQAPCPVFLTLYYK SLLTVIQDICLTSCMMYEQDNPAVGIVPSEWLKMHFQTMWTNFKGACFDKGAITGGEL KIVHQSMFCDLFDTDAAIGGMFAPARMQVRIARAMLMVPKTIKIKNRIIFSNSTGAES IQAGFMKPASQRDSYIVGGPYMKFLNALHKTLFPSTKTSALYLWHKIGQTTKNPILPG VSGEHLTELCNYVKASSQAFEEINVLDLVPDTLTSYAKIKLNSSILRACGQTQFYATT LSCLSPVTQLVPAEEYPHVLGPVGLSSPDEYRVKVAGRSVTIVQSTLKQAVSTNGRLR PIITVPLVVNKYTGSNGNTNVFHCANLGYFSGRGVDRNLRPESVPFKKNNVSSMLRKR HVIMTPLVDRLVKRIVGINSGEFEAEAVKRSVQNVLEDRDNPNLPKTVVLELVKHLGS SCASLTEEDVIYYLGPYAVLGDEVLSLLSTVGQAGVPWTAEGVASVIQDIIDDCELQF VGPEEPCLIQGQSVVEELFPSPGVPSLTVGKKRKIASLLSDLDL","17.9858975232","1.256E-72"
"NC_009333","6594..8681","ORF7","ORF7","HHV8GK18_gp04","","subunit of terminase; herpesvirus core gene UL28 family","1","ORF7","YP_001129353.1","https://www.ncbi.nlm.nih.gov/entrez/query.fcgi?db=gene&cmd=Retrieve&dopt=full_report&list_uids=4961505","MAKELAAVYADVSALAMDLCLLSYADPATLDTKSLALTTGKFQS LHGTLLPLLRRQNAHECSGLSLELEHLLENVADALTTLGVCTSRKLSPEEHFSLLHLD ITCNKHRSVRFNFYGNWALELKLSLINDVEIFFKRLSSVFYCIGSGSALEGLGEVLRF VGKLRGISPVPGPDLYVSNLPCLECLQEVCLTPNQGTSLQAMLPDTACSHICTPACGE PVRGLFENELKQLGLQTPESIPTTPCQSRVRQDDEIRQSSLMAVGDHHIFGEVTRSVL EISNLIYWSSGHSDATCDGDRDCSHLASLFTHEADMHKRRVDLAGCLGERGTPKHFFD CFRPDSLETLFCGGLFSSVEDTIESLQKDCSSAFYQQVNYTTALQKQNEFYVRLSKLL AAGQLNLGKCSTESCPSEARRQLVGGDKPEEVLRDAKHRQELYLQKVARDGFKKLSDC IRHQGHILSQTLGLRLWGSVIYNEASALQNHFLHRAQFISLPWQDLTVDCPTRFENSK YIKNSLYCQRLGREHVEILTLEFYKLITGPLSKRHTLFPSPPNVTLAQCFEAAGMLPH QKMMVSEMIWPSIEPKDWIEPNFNQFYSFENQDINHLQKRAWEYIRELVLSVSLYNRT WERELKILLTPQGSPGFKEPKPAGLTTGLYLTFETSAPLVLVDKKYGWIFKDLYALLY HHLQLSNHNDSQV","10.1777418384","1.246E-24"
"NC_009333","8665..11202","ORF8","ORF8","HHV8GK18_gp05","","envelope glycoprotein gB; herpesvirus core gene UL27 family","1","ORF8","YP_001129354.1","https://www.ncbi.nlm.nih.gov/entrez/query.fcgi?db=gene&cmd=Retrieve&dopt=full_report&list_uids=4961501","MTPRSRLATLGTVILLVCFCAGAAHSRGDTFQTSSSPTPPGSSS KAPTKPGEEASGPKSVDFYQFRVCSASITGELFRFNLEQTCPDTKDKYHQEGILLVYK KNIVPHIFKVRRYRKIATSVTVYRGLTESAITNKYELPRPVPLYEISHMDSTYQCFSS MKVNVNGVENTFTDRDDVNTTVFLQPVEGLTDNIQRYFSQPVIYAEPGWFPGIYRVRT TVNCEIVDMIARSAEPYNYFVTSLGDTVEVSPFCYNESSCSTTPSNKNGLSVQVVLNH TVVTYSDRGTSPTPQNRIFVETGAYTLSWASESKTTAVCPLALWKTFPRSIQTTHEDS FHFVANEITATFTAPLTPVANFTDTYSCLTSDINTTLNASKAKLASTHVPNGTVQYFH TTGGLYLVWQPMSAINLTHAQGDSGNPTSSPPPSASPMTTSASRRKRRSASTAAAGGG GSTDNLSYTQLQFAYDKLRDGINQVLEELSRAWCREQVRDNLMWYELSKINPTSVMTA IYGRPVSAKFVGDAISVTECINVDQSSVNIHKSLRTNSKDVCYARPLVTFKFLNSSNL FTGQLGARNEIILTNNQVETCKDTCEHYFITRNETLVYKDYAYLRTINTTDISTLNTF IALNLSFIQNIDFKAIELYSSAEKRLASSVFDLETMFREYNYYTHRLAGLREDLDNTI DMNKERFVRDLSEIVADLGGIGKTVVNVASSVVTLCGSLVTGFINFIKHPLGGMLMII IVIAIILIIFMLSRRTNTIAQAPVKMIYPDVDRRAPPSGGAPTREEIKNILLGMHQLQ QEERQKADDLKKSTPSVFQRTANGLRQRLRGYKPLTQSLDISPETGE","1.7689622436","0.0384500878"
"NC_009333","11329..14367","ORF9","ORF9","HHV8GK18_gp06","","DNA polymerase catalytic subunit; herpesvirus core gene UL30 family","1","ORF9","YP_001129355.1","https://www.ncbi.nlm.nih.gov/entrez/query.fcgi?db=gene&cmd=Retrieve&dopt=full_report&list_uids=4961513","MDFFNPFIDPTRGGPRNTVRQPTPSQSPTVPSETRVCRLIPACF QTPGRPGVVAVDTTFPPTYFQGPKRGEVFAGETGSIWKTRRGQARNAPMSHLIFHVYD IVETTYTADRCEDVPFSFQTDIIPSGTVLKLLGRTLDGASVCVNVFRQRCYFYTLAPQ GVNLTHVLQQALQAGFGRASCGFSTEPVRKKILRAYDTQQYAVQKITLSSSPMMRTLS DRLTTCGCEVFESNVDAIRRFVLDHGFSTFGWYECSNPAPRTQARDSWTELEFDCSWE DLKFIPERTEWPPYTILSFDIECMGEKGFPNATQDEDMIIQISCVLHTVGNDKPYTRM LLGLGTCDPLPGVEVFEFPSEYDMLAAFLSMLRDYNVEFITGYNIANFDLPYIIARAT QVYDFKLQDFTKIKTGSVFEVHQPRGGSDGGNFMRSQSKVKISGIVPIDMYQVCREKL SLSDYKLDTVAKQCLGRQKDDISYKDIPPLFKSGPDGRAKVGNYCVIDSVLVMDLLLR FQTHVEISEIAKLAKIPTRRVLTDGQQIRVFSCLLEAAATEGYILPVPKGDAVSGYQG ATVISPSPGFYDDPVLVVDFASLYPSIIQAHNLCYSTLIPGDSLHLHPHLSPDDYETF VLSGGPVHFVKKHKRESLLAKLLTVWLAKRKEIRKTLASCTDPALKTILDKQQLAIKV TCNAVYGFTGVASGILPCLNIAETVTLQGRKMLERSQAFVEAISPERLAGLLRRPVDV SPDARFKVIYGDTDSLFICCMGFNMDSVSDFAEELASITTNTLFRSPIKLEAEKIFKC LLLLTKKRYVGVLSDDKVLMKGVDLIRKTACRFVQEKSSQVLDLILREPSVKAAAKLI SGQATDWVYREGLPEGFVKIIQVLNASHRELCERSVPVDKLTFTTELSRPLADYKTQN LPHLTVYQKLQARQEELPQIHDRIPYVFVDAPGSLRSELAEHPEYVKQHGLRVAVDLY FDKLVHAVANIIQCLFQNNTSATVAILYNFLDIPVTFPTP","6.1063891896","5.096E-10"
"NC_009333","15756..16979","ORF11","ORF11","HHV8GK18_gp08","","derived from herpesvirus dUTPase; related to HHV-5 UL82, UL83 and UL84","1","ORF11","YP_001129357.1","https://www.ncbi.nlm.nih.gov/entrez/query.fcgi?db=gene&cmd=Retrieve&dopt=full_report&list_uids=4961439","MAQESEQCSRAFAVCSSKRQLGRGEPVWDSVIHPSHIVISNRVP LLLREQNICLPSCPSVGQILHRAYPNFTFDNTHRKQQTETYTAFYAFGDQNNKVRILP TVVESSSSVLIFRLRASVSANIAVGGLKIIILALTLVHAQGVYLRCGKDLSTPHCAPA IVQREVLSSGFEPQFTVTGIPVTSSNLNQCYFLVRKPKSRLAKPFARLSAETTEECRV RSIRLGKTHLRISVTAPAQETPVWGLVTTSFSLTPTAPLAFDRNPYNHETFACNARHY IPVIYSGPKITLAPRGRQVVWHNNSYTSSLPCKVTAIVSNHCCNCDIFLEDSEWRPNK PAPLKLVNTSDHPVILEPDTHIGNALFIIAPKARGLRRLTRLTTKTIELPGGVKIDSR KLQTFRKMYVATGRS","3.8496363604","5.915E-5"
"NC_009333","complement(17227..17841)","K2","K2","HHV8GK18_gp10","","interleukin-6; vIL-6","1","K2","YP_001129358.1","https://www.ncbi.nlm.nih.gov/entrez/query.fcgi?db=gene&cmd=Retrieve&dopt=full_report&list_uids=4961449","MRWFKLWSILLVGSLLVSGTRGKLPDAPEFEKDLLIQRLNWMLW VIDECFRDLCYRTGICKGILEPAAIFHLKLPAINDTDHCGLIGFNETSCLKKLADGFF EFEVLFKFLTTEFGKSVINVDVMELLTKTLGWDIQEELNKLTKTHYSPPKFDRGLLGR LQGLKYWVRHFASFYVLSAMEKFAGQAVRVLNSIPDVTPDVHDK","13.3767682135","4.133E-41"
"NC_009333","complement(18574..19542)","K3","K3","HHV8GK18_gp11","downregulation of MHC-I","E3 ubiquitin ligase; membrane protein; related to K5; MIR1; ORF12","1","K3","YP_001129360.1","https://www.ncbi.nlm.nih.gov/entrez/query.fcgi?db=gene&cmd=Retrieve&dopt=full_report&list_uids=4961486","MEDEDVPVCWICNEELGNERFRACGCTGELENVHRSCLSTWLTI SRNTACQICGVVYNTRVVWRPLREMTLLPRLTYQEGLELIVFIFIMTLGAAGLAAATW VWLYIVGGHDPEIDHVAAAAYYVFFVFYQLFVVFGLGAFFHMMRHVGRAYAAVNTRVE VFPYRPRPTSPECAVEEIELQEILPRGDNQDEEGPAGAAPGDQDGPADGAPVHRDSEE SVDEAAGYKEAGEPTHNDGRDDNVEPTAVGCDCNNLGAERYRATYCGGYVGAQSGDGA YSVSCHNKAGPSSLVDILPQGLLGGGYGSMGVIRKRSAVSSALMFH","12.3833576423","1.608E-35"
"NC_009333","complement(20023..21036)","ORF70","ORF70","HHV8GK18_gp12","","thymidylate synthase","1","ORF70","YP_001129361.1","https://www.ncbi.nlm.nih.gov/entrez/query.fcgi?db=gene&cmd=Retrieve&dopt=full_report&list_uids=4961481","MFPFVPLSLYVAKKLFRARGFRFCQKPGVLALAPEVDPCSIQHE VTGAETPHEELQYLRQLREILCRGSDRLDRTGIGTLSLFGMQARYSLRDHFPLLTTKR VFWRGVVQELLWFLKGSTDSRELSRTGVKIWDKNGSREFLAGRGLAHRREGDLGPVYG FQWRHFGAAYVDADADYTGQGFDQLSYIVDLIKNNPHDRRIIMCAWNPADLSLMALPP CHLLCQFYVADGELSCQLYQRSGDMGLGVPFNIASYSLLTYMLAHVTGLRPGEFIHTL GDAHIYKTHIEPLRLQLTRTPRPFPRLEILRSVSSMEEFTPDDFRLVDYCPHPTIRME MAV","7.5294309239","2.548E-14"
"NC_009333","complement(22530..23078)","K4.2","K4.2","HHV8GK18_gp14","","contains hydrophobic domains","1","K4.2","YP_001129364.1","https://www.ncbi.nlm.nih.gov/entrez/query.fcgi?db=gene&cmd=Retrieve&dopt=full_report&list_uids=4961450","MQISFAEVLGKPVGRAGFLDRGKWDRCPLYDLFSHLATSATFSG TASGFGAVSGVLPGSCSGIAWSIKPGNYDPLIPFETLMTWDIGSKNPRLTKYWTLLTT SAAPGVSPVSSCFVFGGGGRGECLVSVLLLFFCVCTFGCFGKPYRCAIFWVIHKLHLA TLVFIVAFGEEKRGDPWSPGLQ","31.8850129247","2.154E-223"
"NC_009333","complement(25865..26635)","K5","K5","HHV8GK18_gp16","downregulation of MHC-I","E3 ubiquitin ligase; membrane protein; related to K3; MIR2","1","K5","YP_001129365.1","https://www.ncbi.nlm.nih.gov/entrez/query.fcgi?db=gene&cmd=Retrieve&dopt=full_report&list_uids=4961442","MASKDVEEGVEGPICWICREEVGNEGIHPCACTGELDVVHPQCL STWLTVSRNTACQMCRVIYRTRTQWRSRLNLWPEMERQEIFELFLLMSVVVAGLVGVA LCTWTLLVILTAPAGTFSPGAVLGFLCFFGFYQIFIVFAFGGICRVSGTVRALYAANN TRVTVLPYRRPRRPTANEDNIELTVLVGPAGGTDEEPTDESSEGDVASGDKERDGSSG DEPDGGPNDRAGLRGTARTDLCAPTKKPVRKNHPKNNG","23.2631549521","5.235E-120"
"NC_009333","30242..30769","ORF16","ORF16","HHV8GK18_gp19","","bcl-2-like inhibitor of apoptosis; vBcl-2","1","ORF16","YP_001129368.1","https://www.ncbi.nlm.nih.gov/entrez/query.fcgi?db=gene&cmd=Retrieve&dopt=full_report&list_uids=4961447","MDEDVLPGEVLAIEGIFMACGLNEPEYLYHPLLSPIKLYITGLM RDKESLFEAMLANVRFHSTTGINQLGLSMLQVSGDGNMNWGRALAILTFGSFVAQKLS NEPHLRDFALAVLPVYAYEAIGPQWFRARGGWRGLKAYCTQVLTRRRGRRMTALLGSI ALLATILAAVAMSRR","6.5429359808","3.016E-11"
"NC_009333","complement(30920..31786)","ORF17.5","ORF17.5","HHV8GK18_gp21","","major capsid scaffold protein; herpesvirus core gene UL26.5 family","1","ORF17.5","YP_001129370.1","https://www.ncbi.nlm.nih.gov/entrez/query.fcgi?db=gene&cmd=Retrieve&dopt=full_report&list_uids=4961482","MNSSGQEDIISIPKSAFLSMLQSSIDGMKTTAAKMSHTLSGPGL MGCGGQMFPTDHHLPSYVSNPAPPYGYAYKNPYDPWYYSPQLPGYRTGKRKRGAEDDE GHLFPGEEPAYHKDILSMSKNIAEIQSELKEMKLNGWHAGPPPSSSAAAAAVDPHYRP HANSAAPCQFPTMKEHGGTYVHPPIYVQAPHGQFQQAAPILFAQPHVSHPPVSTGLAV VGAPPAEPTPASSTQSIQQQAPETTHTPCAAVEKDAPTPNPTSNRVEASSRSSPKSKI RKMFCEELLNKQ","2.4013046181","8.168E-3"
"NC_009333","32523..33296","ORF18","ORF18","HHV8GK18_gp22","","related to HHV-5 UL79","1","ORF18","YP_001129371.1","https://www.ncbi.nlm.nih.gov/entrez/query.fcgi?db=gene&cmd=Retrieve&dopt=full_report&list_uids=4961499","MLGKYVCETEPLSPGLRRLMWRFLQNKNLNTFHAQELRFIHLVL CKMYNFGLNVYLLREATANAGTYDEVVLGRKVPAEVWKLVYDGLEEMGVSSEMLLCEA YRDSLWMHLNDKVGLLRGLANYLFHRLGVTHDVRIAPENLVDGNFLFNLGSVLPCRLL LAAGYCLAFWGSDEHERWVRFFAQKLFICYLIVSGRLMPQRSLLVWASETGYPGPVEA VCRDIRSMYGIRTYAVSGYLPAPSEAQLAYLGAFNNNAV","4.8975082083","4.853E-7"
"NC_009333","complement(34710..35483)","ORF20","ORF20","HHV8GK18_gp23","","nuclear protein; herpesvirus core gene UL24 family","1","ORF20","YP_001129373.1","https://www.ncbi.nlm.nih.gov/entrez/query.fcgi?db=gene&cmd=Retrieve&dopt=full_report&list_uids=4961477","MVRPTEAEVKKSLSRLPAARKRAGNRAHLATYRRLLKYSTLPDL WRFLSSRPQNPPLGHHRLFFEVTLGHRIADCVILVSGGHQPVCYVVELKTCLSHQLIP TNTVRTSQRAQGLCQLSDSIHYIAHSAPPGTEAWTITPLLIFKNQKTLKTVYSESPGA FPTPVHTTEGKLCAFLTARENADIRKVLSKVPKKPKMDRGGKILGPTPGKRAVYSQAH HGRNKKGRPWTAQPTRAKSRTKDKGTPAFPRAGPACSGP","2.8071269767","2.499E-3"
"NC_009333","35482..37224","ORF21","ORF21","HHV8GK18_gp25","","thymidine kinase; herpesvirus core gene UL23 family","1","ORF21","YP_001129374.1","https://www.ncbi.nlm.nih.gov/entrez/query.fcgi?db=gene&cmd=Retrieve&dopt=full_report&list_uids=4961484","MAEGGFGADSVGRGGEKASVTRGGRWDLGSSDDESSTSTTSTDM DDLPEERKPLTGKSVKTSYIYDVPTVPTSKPWHLMHDNSLYATPRFPPRPLIRHPSEK GSIFASRLSATDDDSGDYAPMDRFAFQSPRVCGRPPLPPPNHPPPATRPADASMGDVG WADLQGLKRTPKGFLKTSTKGGSLKARGRDVGDRLRDGGFAFSPRGVKSAIGQNIKSW LGIGESSATAVPVTTQLMVPVHLIRTPVTVDYRNVYLLYLEGVMGVGKSTLVNAVCGI LPQERVTSFPEPMVYWTRAFTDCYKEISHLMKSGKAGDPLTSAKIYSCQNKFSLPFRT NATAILRMMQPWNVGGGSGRGTHWCVFDRHLLSPAVVFPLMHLKHGRLSFDHFFQLLS IFRATEGDVVAILTLSSAESLRRVRARGRKNDGTVEQNYIRELAWAYHAVYCSWIMLQ YITVEQMVQLCVQTTNIPEICFRSVRLAHKEETLKNLHEQSMLPMITGVLDPVRHHPV VIELCFCFFTELRKLQFIVADADKFHDDVCGLWTEIYRQILSNPAIKPRAINWPALES QSKAVNHLEETCRV","9.1666922071","2.439E-20"
"NC_009333","37212..39404","ORF22","ORF22","HHV8GK18_gp26","","envelope glycoprotein gH; herpesvirus core gene UL22 family","1","ORF22","YP_001129375.1","https://www.ncbi.nlm.nih.gov/entrez/query.fcgi?db=gene&cmd=Retrieve&dopt=full_report&list_uids=4961506","MQGLAFLAALACWRCISLTCGATGALPTTATTITRSATQLINGR TNLSIELEFNGTSFFLNWQNLLNVITEPALTELWTSAEVAEDLRVTLKKRQSLFFPNK TVVISGDGHRYTCEVPTSSQTYNITKGFNYSALPGHLGGFGINARLVLGDIFASKWSL FARDTPEYRVFYPMNVMAVKFSISIGNNESGVALYGVVSEDFVVVTLHNRSKEANETA SHLLFGLPDSLPSLKGHATYDELTFARNAKYALVAILPKDSYQTLLTENYTRIFLNMT ESTPLEFTRTIQTRIVSIEARRACAAQEAAPDIFLVLFQMLVAHFLVARGIAEHRFVE VDCVCRQYAELYFLRRISRLCMPTFTTVGYNHTTLGAVAATQIARVSATKLASLPRSS QETVLAMVQLGARDGAVPSSILEGIAMVVEHMYTAYTYVYTLGDTERKLMLDIHTVLT DSCPPKDSGVSEKLLRTYLMFTSMCTNIELGEMIARFSKPDSLNIYRAFSPCFLGLRY DLHPAKLRAEAPQSSALTRTAVARGTSGFAELLHALHLDSLNLIPAINCSKITADKII ATVPLPHVTYIISSEALSNAVVYEVSEIFLKSAMFISAIKPDCSGFNFSQIDRHIPIV YNISTPRRGCPLCDSVIMSYDESDGLQSLMYVTNERVQTNLFLDKSPFFDNNNLHIHY LWLRDNGTVVEIRGMYRRRAASALFLILSFIGFSGVIYFLYRLFSILY","10.0131086607","6.675E-24"
"NC_009333","complement(40619..42877)","ORF24","ORF24","HHV8GK18_gp27","","related to HHV-5 UL87","1","ORF24","YP_001129377.1","https://www.ncbi.nlm.nih.gov/entrez/query.fcgi?db=gene&cmd=Retrieve&dopt=full_report&list_uids=4961485","MAALEGPLLLPPSASLTTSPQTTCYQATWESQLEIFCCLATNSH LQAELTLEGLDKMMQPEPTFFACRAIRRLLLGERLHPFIHQEGTLLGKVGRRYSGEGL IIDGGGVFTRGQIDTDNYLPAVGSWELTDDCDKPCEFRELRSLYLPALLTCTICYKAM FRIVCRYLEFWEFEQCFHAFLAVLPHSLQPTIYQNYFALLESLKHLSFSIMPPASPDA QLHFLKFNISSFMATWGWHGELVSLRRAIAHNVERLPTVLKNLSKQSKHQDVKVNGRD LVGFQLALNQLVSRLHVKIQRKDPGPKPYRVVVSTPDCTYYLVYPGTPAIYRLVMCMA VADCIGHSCSGLHPCANFLGTHETPRLLAATLSRIRYAPKDRRAAMKGNLQACFQRYA ATDARTLGSSTVSDMLEPTKHVSLENFKITIFNTNMVINTKISCHVPNTLQKTILNIP RLTNNFVIRKYSVKEPSFTISVFFSDNMCQGTAININISGDMLHFLFAMGTLKCFLPI RHIFPVSIANWNSTLDLHGLENQYMVRMGRKNVFWTTNFPSVVSSKDGLNVSWFKAAT ATISKVYGQPLVEQIRHELAPILTDQHARIDGNKNRIFSLLEHRNRSQIQTLHKRFLE CLVECCSFLRLDVACIRRAAARGLFDFSKKIISHTKSKHECAVLGYKKCNLIPKIYAR NKKTRLDELGRNANFISFVATTGHRFAALKPQIVRHAIRKLGLHWRHRTAASNEQTPP ADPRVRCVRPLV","8.7511551136","1.056E-18"
"NC_009333","47973..48845","ORF27","ORF27","HHV8GK18_gp31","","","1","ORF27","YP_001129380.1","https://www.ncbi.nlm.nih.gov/entrez/query.fcgi?db=gene&cmd=Retrieve&dopt=full_report&list_uids=4961487","MASSDILSVARTDDGSVCEVSLRGGRKKTTVYLPDTEPWVVETD AIKDAFLSDGIVDMARKLHRGALPSNSHNGLRMVLFCYCYLQNCVYLALFLCPLNPYL VTPSSIEFAEPVVAPEVLFPHPAEMSRGCDDAIFCKLPYTVPIINTTFGRIYPNSTRE PDGRPTDYSMALRRAFAVMVNTSCAGVTLCRGETQTASRNHTEWENLLAMFSVIIYAL DHNCHPEALSIASGIFDERDYGLFISQPRSVPSPTPCDVSWEDIYNGTYLARPGNCDP WPNLSTPPLILNFK","10.2850925644","4.113E-25"
"NC_009333","complement(join(49462..50604,53855..54775))","ORF29","ORF29","HHV8GK18_gp33","","putative ATPase subunit of terminase; herpesvirus core gene UL15 family","1","ORF29","YP_001129382.1","https://www.ncbi.nlm.nih.gov/entrez/query.fcgi?db=gene&cmd=Retrieve&dopt=full_report&list_uids=4961443","MLLSRHRERLAANLQETAKDAGERWELSAPTFTRHCPKTARMAH PFIGVVHRINSYSSVLETYCTRHHPATPTSANPDVGTPRPSEDNVPAKPRLLESLSTY LQMRCVREDAHVSTADQLVEYQAARKTHDSLHACSVYRELQAFLVNLSSFLNGCYVPG VHWLEPFQQQLVMHTFFFLVSIKAPQKTHQLFGLFKQYFGLFETPNSVLQTFKQKASV FLIPRRHGKTWIVVAIISMLLASVENINIGYVAHQKHVANSVFAEIIKTLCRWFPPKN LNIKKENGTIIYTRPGGRSSSLMCATCFNKNSIRGQTFNLLYVDEANFIKKDALPAIL GFMLQKDAKLIFISSVNSSDRSTSFLLNLRNAQEKMLNVVSYVCADHREDFHLQDALV SCPCYRLHIPTYITIDESIKTTTNLFMEGAFDTELMGEGAASSNATLYRVVGDAALTQ FDMCRVDTTAQQVQKCLGKQLFVYIDPAYTNNTEASGTGVGAVVTSTQTPTRSLILGM EHFFLRDLTGAAAYEIASCACTMIKAIAVLHPTIERVNAAVEGNSSQDSGVAIATVLN EICPLPIHFLHYTDKSSALQWPIYMLGGEKSSAFETFIYALNSGTLSASQTVVSNTIK ISFDPVTYLVEQVRAIKCVPLRDGGQSYSAKQKHMSDDLLVAVVMAHFMATDDRHMYK PISPQ","5.007076834","2.763E-7"
"NC_009333","50723..50956","ORF30","ORF30","HHV8GK18_gp34","","related to HHV-5 UL91","1","ORF30","YP_001129383.1","https://www.ncbi.nlm.nih.gov/entrez/query.fcgi?db=gene&cmd=Retrieve&dopt=full_report&list_uids=4961433","MGEPVDPGHVVNEKDFEECEQFFSQPLREQVVAGVRALDGLGLA DSLCHKTERLCLLMDLVGTECFARVCRLDTGAK","4.1765317579","1.48E-5"
"NC_009333","50953..51537","ORF31","ORF31","HHV8GK18_gp35","","related to HHV-5 UL92","1","ORF31","YP_001129384.1","https://www.ncbi.nlm.nih.gov/entrez/query.fcgi?db=gene&cmd=Retrieve&dopt=full_report&list_uids=4961498","MKSVASPLCQFHGVFCLYQCRQCLAYHVCDGGAECVLLHTPESV ICELTGNCMLGNIQEGQFLGPVPYRTLDNQVDRDAYHGMLACLKRDIVRYLQTWPDTT VIVQEIALGDGVTDTISAIIDETFGECLPVLGEAQGGYALVCSMYLHVIVSIYSTKTV YNSMLFKCTKNKKYDCIAKRVRTKWMRMLSTKDT","7.7195103773","5.839E-15"
"NC_009333","54774..55757","ORF34","ORF34","HHV8GK18_gp38","","related to HHV-5 UL95","1","ORF34","YP_001129387.1","https://www.ncbi.nlm.nih.gov/entrez/query.fcgi?db=gene&cmd=Retrieve&dopt=full_report&list_uids=4961504","MFALSSLVSEGDPEVTSRYVKGVQLALDLSENTPGQFKLIETPL NSFLLVSNVMPEVQPICSGLPALRPDFSNLHLPRLEKLQRVLGQGFGAAGEEIALDPS HVETHEKGQVFYNHYATEEWTWALTLNKDALLREAVDGLCDPGTWKGLLPDDPLPLLW LLFNGPASFCRADCCLYKQHCGYPGPVLLPGHMYAPKRDLLSFVNHALKYTKFLYGDF SGTWAAACRPPFATSRIQRVVSQMKIIDASDTYISHTCLLCHIYQQNSIIAGQGTHVG GILLLSGKGTQYITGNVQTQRCPTTGDYLIIPSYDIPAIITMIKENGLNQL","2.3047614938","0.0105899674"
"NC_009333","55738..56190","ORF35","ORF35","HHV8GK18_gp39","","tegument protein; herpesvirus core gene UL14 family","1","ORF35","YP_001129388.1","https://www.ncbi.nlm.nih.gov/entrez/query.fcgi?db=gene&cmd=Retrieve&dopt=full_report&list_uids=4961512","MDSTNSKREFIKSALEANINRRAAVSLFDRFGGSSAVFEKQFQD AQHAVRAHGALKREAELGTLVRKAGQRFEALKRERSILRQPRDLPRVADIDALVDAVA DLKEEVAVRLDALEENGEETPTHSSSEIKDTIVRWRLDDLPPVCPETP","10.6459171309","9.109E-27"
"NC_009333","57372..58832","ORF37","ORF37","HHV8GK18_gp41","host shutoff","deoxyribonuclease; herpesvirus core gene UL12 family; SOX","1","ORF37","YP_001129390.1","https://www.ncbi.nlm.nih.gov/entrez/query.fcgi?db=gene&cmd=Retrieve&dopt=full_report&list_uids=4961483","MEATPTPADLFSEDYLVDTLDGLTVDDQQAVLASLSFSKFLKHA KVRDWCAQAKIQPSMPALRMAYNYFLFSKVGEFIGSEDVCNFFVDRVFGGVRLLDVAS VYAACSQMNAHQRHHICCLVERATSSQSLNPVWDALRDGIISSSKFHWAVKQQNTSKK IFSPWPITNNHFVAGPLAFGLRCEEVVKTLLATLLHPDEANCLDYGFMQSPQNGIFGV SLDFAANVKTDTEGRLQFDPNCKVYEIKCRFKYTFAKMECDPIYAAYQRLYEAPGKLA LKDFFYSISKPAVEYVGLGKLPSESDYLVAYDQEWEACPRKKRKLTPLHNLIRECILH NSTTESDVYVLTDPQDTRGQISIKARFKANLFVNVRHSYFYQVLLQSSIVEEYIGLDS GIPRLGSPKYYIATGFFRKRGYQDPVNCTIGGDALDPHVEIPTLLIVTPVYFPRGAKH RLLHQAANFWSRSAKDTFPYIKWDFSYLSANVPHSP","5.8065883696","3.188E-9"
"NC_009333","58787..58972","ORF38","ORF38","HHV8GK18_gp42","","myristylated tegument protein anchored in envelope; herpesvirus core gene UL11 family","1","ORF38","YP_001129391.1","https://www.ncbi.nlm.nih.gov/entrez/query.fcgi?db=gene&cmd=Retrieve&dopt=full_report&list_uids=4961435","MGFLLSICKRPSQPVDVDGEPLDVVVDYDPIRVSEKGMLLEQSQ SPYPALKKKKKNKEAIY","206.5161508376","0"
"NC_009333","complement(59072..60274)","ORF39","ORF39","HHV8GK18_gp43","","envelope glycoprotein gM; herpesvirus core gene UL10 family","1","ORF39","YP_001129392.1","https://www.ncbi.nlm.nih.gov/entrez/query.fcgi?db=gene&cmd=Retrieve&dopt=full_report&list_uids=4961437","MRASKSDRFLMSSWVKLLFVAVIMYICSAVVPMAATYEGLGFPC YFNNLVNYSALNLTVRNSAKHLTPTLFLEKPEMLVYIFWTFIVDGIAIVYYCLAAVAV YRAKHVHATTMMSMQSWIALLGSHSVLYVAILRMWSMQLFIHVLSYKHVLMAAFVYCI HFCISFAHIQSLITCNSAQWEIPLLEQHVPDNTMMESLLTRWKPVCVNLYLSTTALEM LLFSLSTMMAVGNSFYVLVSDAIFGAVNMFLALTVVWYINTEFFLVKFMRRQVGFYVG VFVGYLILLLPVIRYENAFVQANLHYIVAINISCIPILCILAIVIRVIRSDWGLCTPS AAYMPLATSAPTVDRTPTVHQKPPPLPAKTRARAKVKDISTPAPRTQYQSDHESDSEI DETQMIFI","5.9558157784","1.294E-9"
"NC_009333","join(60407..61756,61884..62543)","ORF40","ORF40","HHV8GK18_gp44","","subunit of helicase-primase complex; herpesvirus core gene UL8 family","1","ORF40","YP_001129393.1","https://www.ncbi.nlm.nih.gov/entrez/query.fcgi?db=gene&cmd=Retrieve&dopt=full_report&list_uids=4961438","MATSEETAAGYVIGVYFHSVHVHCRIIVWQVNFLPLDPNDGETE CYFVVDTLTKEAMERMPEIQECVPSITEHARDLAIWELALRLQNQTIVKAVRTASLPV VLIMTVGRIVNDVIPCPNVRTPRPLACAYLHCEATVTFEVPLTGPAASTGTWHSSIYR ECAISAIEICLKTSRGIYSCQSNEAPEAKREKRGLDISDVFVCLTYDIPIAGRVLSLL VPHAPAFHVLWINEDSKWNGAAVEFFRALHHKLFSERNGIPPLWLYVFPGAVEEGTAF APLLPAFPCIPLRYGSPTSLDRASVQWDLFEPHILTHFDGIKRTSLADTVFGYDSLAI SRECEDQYVWPTPVTDININLCTDSDTMAIVREPSGLVAVNLEALLRTDSVLSRVSSI VSLDTLLDLSTPECRRSVELRYNSLLSTVLSWSTSRGHKWAAIVKWKLFFLVQALEPE QWSPEFKDLKRACQMAGFTLKGGTSGDLVFSSHANLLFSTSMGYFLHAGSPRSTAGTG GEPNPRHITGPDTEGNGEHRNSPNLCGFVTWLQSLTTCIERALNMPPDTSWLQLIEEV IPLYFHRRRQTSFWLIPLSHCEGIPVCPPLPFDCLAPRLFIVTKSGPMCYRAGFSLPV DVNYLFYLEQTLKAVRQVSPQEHNPQDAKEMTLQLEAWTRLLSLF","6.1147276423","4.836E-10"
"NC_009333","complement(62535..63371)","ORF42","ORF42","HHV8GK18_gp46","","tegument protein; herpesvirus core gene UL7 family","1","ORF42","YP_001129394.1","https://www.ncbi.nlm.nih.gov/entrez/query.fcgi?db=gene&cmd=Retrieve&dopt=full_report&list_uids=4961440","MSLERALARLTGVPMSTHAPKTRESEEACPVYPHPVVPRLVLEV HRKNNALVGSNTPKMSVMGHLDIACLREHVKSRLSSPNFVGFTVVCLVEHEDMVTHID LHPHVFQERVCLLRPTSPGITELCCLLSMLENCRDMSPTFLRSIICRARKTHERTPGM DAAFVMHGIETLTATAAFVYELSVDDHFRATPLVMFKLHKAIGDASTPMGGLMKPIYL ESFKLESSGENEDDKQTCADPVNIFYCDTIFTKHLENNEVLKYLKMCTLFKPPIVSLF SK","32.0092028822","4.06E-225"
"NC_009333","complement(63235..65052)","ORF43","ORF43","HHV8GK18_gp45","","portal protein; herpesvirus core gene UL6 family","1","ORF43","YP_001129395.1","https://www.ncbi.nlm.nih.gov/entrez/query.fcgi?db=gene&cmd=Retrieve&dopt=full_report&list_uids=4961497","MLRMNPGLGSSISVHPSELSISLFEILQGKYSYVRGQTLHCSLR NPGVFFRQLFIHLYKNALANCSYDHVLSDWRTYESSAKTRWPEKEAQWGSYRRSTFDS WAQTMRMTLDHLLLNAINRVLYAKTQLSYERYVDWVVTVGMVPVVKHTPDHKLVNSIQ EQLMKDCQRLASGEKTIGRILTSVTQEISNLVSSLSALYIPGYSEVSIDYDCVKNTFV GLYKQKRVHVEVITMPAILAGRVIFDSPIQRMYTSIMSCHRTAEHAKLCQLLNTAPTK ALVGSACNNVYKDIMTHLEQASQRTDPKRELLNLLMKLAENKTVSGVTDVVEDFVTDV SQNIVDKNKLFGTGQETTTQGLRRQVSNSVFKCLTNQINEQFDTITQLEKERELCMKR LKCIETQLSHQQPGDAKGPGSVNLLTANTFQSLGRLQDPSLQLTSSHIPSGSAVLNSF FSSYIPPVRESMKDLTNLWESEMFQTYKLAPVVDNQGQRLSVTYSQDTISILLGPFTY VIADLLQMELISHSFVSSSLQDIAAYLYQTSRLFVYITDVGQKYCLVTPPFENVPGKG PGETDWSANEYSCPEDSRVRRGLSRIPPPCGAPPCPGSA","5.6506835443","7.991E-9"
"NC_009333","64991..67357","ORF44","ORF44","HHV8GK18_gp47","","helicase subunit of helicase-primase complex; herpesvirus core gene UL5 family","1","ORF44","YP_001129396.1","https://www.ncbi.nlm.nih.gov/entrez/query.fcgi?db=gene&cmd=Retrieve&dopt=full_report&list_uids=4961457","MDSSEGCTDMDEPSPGFILNMTSDAKVRSVVEQIDRLSNITTSP PEMGWYDLEFDPLEDEGPFLPFSAYVITGTAGAGKSTSVSALHQNLNCLITGATVVAA QNLSRALKSYCPTIYHAFGFKSRHINICQRKVPKVTQSSIEQLQRYELARYWPTVTDI IREFMRKKQKGQYSSLSQSAFRLLCRMGGANLWTSNIIVIDEAGTLSSHILTAVVFFY WFYNSWLDTPLYRNGAVPCIVCVGSPTQTDAFQSVFNHTQQRNEISACDNVLTFLLGK REVADYIRLDENWALFINNKRCTDPQFGHLLKTLEYNLDISPELMDYIDRFVVPKSKI LDPLEYAGWTRLFISHQEVKSFLATLHTCLSSNKDAVSTKLFTCPVVCEVFTEPFEEY KRAVGLTHMTPIEWVTKNLFRLSNYSQFADQDMAVVGTYITDASTQITFATKFVKNSY ATLTGKTKKCICGFHGSYQRFKSILDGELFIESHSHDNPAYVYSFLSTLLYNAMYSFY AHGVKQGHEEFLRDLRELPVSQELISEMSSEDVLGQEGDTDAFYLTASLPPSPTHAAL PTLVAYYSGAKELFCNRLALARRHFGDEFLHSDFSTFTVNIVVRDGVDFVSTSPGLHG LVAYASTIDTYIIQGYTFLPVRFGRPGGQRLSEDLRRKMPSIVVQDSSGFIACLENNV TKMTETLEGGDVFNICCAGDYGISSNLAMTIVKAQGVSLSRVAISFGNHRNIRASLVY VGVSRAIDARYLVMDSNPLKLMDRGDAQSPSSKYIIKALCNPKTTLIY","2.2734688395","0.0114989709"
"NC_009333","complement(67452..68675)","ORF45","ORF45","HHV8GK18_gp51","inhibition of IRF-7","virion phosphoprotein","1","ORF45","YP_001129397.1","https://www.ncbi.nlm.nih.gov/entrez/query.fcgi?db=gene&cmd=Retrieve&dopt=full_report&list_uids=4961474","MAMFVRTSSSTHDEERMLPIEGAPRRRPPVKFIFPPPPLSSLPG FGRPRGYAGPTVIDMSAPDDVFAEDTPSPPATPLDLQISPDQSSGESEYDEDEEDEDE EENDDVQEEDEPEGYPADFFQPLSHLRPRPLARRAHTPKPVAVVAGRVRSSTDTAESE ASMGWVSQDDGFSPAGLSPSDDEGVAILEPMAAYTGTGAYGLSPASRNSVPGTQSSPY SDPDEGPSWRPLRAAPTAIVDLTSDSDSDDSSNSPDVNNEAAFTDARHFSHQPPSSEE DGEDQGEVLSQRIGLMDVGQKRKRQSTASSGSEDVVRCQRQPNLSRKAVASVIIISSG SDTDEEPSSAVSVIVSPSSTKGHLPTQSPSTSAHSISSGSTTTAGSRCSDPTRILAST PPLCGNGAYNWPWLD","20.9965055146","3.53E-98"
"NC_009333","complement(68736..69503)","ORF46","ORF46","HHV8GK18_gp50","","uracil-DNA glycosylase; herpesvirus core gene UL2 family","1","ORF46","YP_001129398.1","https://www.ncbi.nlm.nih.gov/entrez/query.fcgi?db=gene&cmd=Retrieve&dopt=full_report&list_uids=4961472","MDAWLQQTVFRGTLSISQGVDDRDLLLAPKWISFLSLSSFLKQK LLSLLRQIRELRLTTTVYPPQDKLMWWSHCCDPEDIKVVILGQDPYHKGQATGLAFSV DPQCQVPPSLRSIFRELEASVPNFSTPSHGCLDSWARQGVLLLNTVLTVEKGRAGSHE GLGWDWFTSFIISSISSKLEHCVFLLWGRKAIDRTPLINAQKHLVLTAQHPSPLASLG GRHSRWPRFQGCNHFNLANDYLTRHRRETVDWGLLEQ","2.4302686669","7.544E-3"
"NC_009333","complement(69511..70014)","ORF47","ORF47","HHV8GK18_gp49","","envelope glycoprotein gL; herpesvirus core gene UL1 family","1","ORF47","YP_001129399.1","https://www.ncbi.nlm.nih.gov/entrez/query.fcgi?db=gene&cmd=Retrieve&dopt=full_report&list_uids=4961475","MGIFALFAVLWTTLLVTSHAYVALPCCAIQASAASTLPLFFAVH SIHFADPNHCNGVCIAKLRSKTGDITVETCVNGFNLRSFLVAVVRRLGSWASQENLRL LWYLQRSLTAYTVGFNATTADSSIHNVNIIIISVGKAMNRTGSVSGSQTRAKSSSRRA HAGQKGK","2.0581227856","0.0197891741"
"NC_009333","complement(70272..71480)","ORF48","ORF48","HHV8GK18_gp48","","","1","ORF48","YP_001129400.1","https://www.ncbi.nlm.nih.gov/entrez/query.fcgi?db=gene&cmd=Retrieve&dopt=full_report&list_uids=4961458","MEVCIPIPGIGDENCESWRAQIVAFGTTSGFVKTERILRGLFPE RGHPGFLASLVVLKHTLASPGGLNTRLNLLPVLQMLKYVGQEMYMRAKCQATASDMTL IWDDCKDRFMLILEQACGCHQCMTVVEEITHCSAISAPPSSLSHGRHILSAGLINFAR RQVLLGGSVSFSEFSIPDLIQTPEQYPFVDVEFRRELSLISSCLNVCWLYHIFIEHIT SDVRRLESCMASVLEEYGGLSPTRPWAEAVTFLSQLPRPTRKPWKELSVSRINVEARL LDTLVMQLEKPVPVEIIKHALAILGTAGHVWNPEHQLACPDTRTCRERVSKGPCVGDG DVTLVHTARMDISNPSSVSPDGDVHYSGPPRTPAYGVVLECADDSDDSLDDFLENLSQ TCDSSDDEYD","6.8796315639","3E-12"
"NC_009333","join(71695..71712,72671..74728)","ORF50","ORF50","HHV8GK18_gp52","induces switch from latent to lytic infection","transactivator; RTA","1","ORF50","YP_001129401.1","https://www.ncbi.nlm.nih.gov/entrez/query.fcgi?db=gene&cmd=Retrieve&dopt=full_report&list_uids=4961526","MAQDDKGKKLRRSCVESFVGLSDELKAQLYQCVLLINDAYETIY DPSDLNRVVEDVCIRIMKECSKLGALCGLFTDINMFNLFCFFRASRMRTKGAAGYNVP CAEASQGIIRILTERILFCTEKAFLTAACSGVSLPPAICKLLHEIYTEMKAKCLGAWR RLVCNRRPIMILTSSLLKLYNTYDTAGLLSEQSRALCLLVFQPVYLPRIMAPLEIMTK GQLAPENFYSITGSAEKRRPITTGKVTGLSYPGSGLMPESLILPILEPGLLPASMVDL SDVLAKPAVILSAPALSQFVISKPHPNMPHTVSIIPFNPSGTDPAFISTWQAASQNMV YNTSTAPLKPATGSSQTVSVKAVAQGAVITATTVPQAMPARGTGGELPVMSASTPARD QVAACFVAENTGDSPDNPSSFLTSCHPCDPNTVIVAQQFQPPQCVTLLQVTCAPSSTP PPDSTVRAPVVQLPTVVPLPASAFLPALAQPEASGEELPGGHDGDQGVPCRDSTAAAT AAEATTPKRKQRSKERSSKKRKALTVPEADTTPSTTTPGTSLGSITTPQDVHATDVAT SEGPSEAQPPLLSLPPPLDVDQSLFALLDEAGPETWDVGSPLSPTDDALLSSILQGLY QLDTPPPLRSPSPASFGPESPADIPSPSGGEYTQLQPVRATSATPANEVQESGTLYQL HQWRNYFRD","3.7131345131","1.024E-4"
"NC_009333","complement(71729..72637)","ORF49","ORF49","HHV8GK18_gp53","","","1","ORF49","YP_001129402.1","https://www.ncbi.nlm.nih.gov/entrez/query.fcgi?db=gene&cmd=Retrieve&dopt=full_report&list_uids=4961448","MTSRRPLKDHLFNHLFRYHYPSWDQILQELDTLSVATLNPDCHV PALNVEKTLYLAKTIQILVQHRQSEPYLVPAARANLAYSLQQLYKLGNDKIRGVINGM LPLVDAGCIGFERELIKGLPRVLTLQYPHTAPLESEPPTADCTEWCLSHFVGASGRLR SEVRDILTTHNGTCAPSFQWMASVVKKFFLVETVIYEDFQDTDFNVQLNLCFFWTAVV QMYQRCIYEQKLVHIISTSLTLLKSTARSFFAWYDLYRPNLGSAALVKYTEHLIRALT PDCSDVELGELCSHLHHCKHALFSIQ","7.9880545801","6.854E-16"
"NC_009333","join(74949..75662,75744..75890)","K8","K8","HHV8GK18_gp54","switch from latent to lytic infection (putative)","bZIP transcription factor","1","K8","YP_001129403.1","https://www.ncbi.nlm.nih.gov/entrez/query.fcgi?db=gene&cmd=Retrieve&dopt=full_report&list_uids=4961462","MPRMKDIPTKSSPGTDNSEKDEAVIEEDLSLNGQPFFTDNTDGG ENEVSWTSSLLSTYVGCQPPAIPVCETVIDLTAPSQSGAPGDEHLPCSLNAETKFHIP DPSWTLSHTPPRGPHISQQLPTRRSKRRLHRKFEEERLCTKAKQGAGRPVPASVVKVG NITPHYGEELTRGDAVPAAPITPPYPRVQRPAQPTHVLFSPVFVSLKAEVCDQSHSPT RKQGRYGRVSSKAYTRQLQQALEEKDAQLCFLAARLEAHKEQIIFLRDMLMRMCQQPA SPTDAPLPPC","6.9577706743","1.728E-12"
"NC_009333","join(76014..76437,76532..76794)","K8.1","K8.1","HHV8GK18_gp55","","envelope glycoprotein; ORF51","1","K8.1","YP_001129404.1","https://www.ncbi.nlm.nih.gov/entrez/query.fcgi?db=gene&cmd=Retrieve&dopt=full_report&list_uids=4961469","MSSTQIRTEIPVALLILCLCLVACHANCPTYRSHLGFWQEGWSG QVYQDWLGRMNCSYENMTALEAVSLNGTRLAAGSPSSEYPNVSVSVEDTSASGSGEDA IDESGSGEEERPVTSHVTFMTQSVQATTELTDALISAFSGSYSSGEPSRTTRIRVSPV AENGRNSGASNRVPFSATTTTTRGRDAHYNAEIRTHLYILWAVGLLLGLVLILYLCVP RCRRKKPYIV","2.5069566091","6.089E-3"
"NC_009333","complement(77432..77764)","ORF53","ORF53","HHV8GK18_gp57","","envelope glycoprotein gN; herpesvirus core gene UL49A family","1","ORF53","YP_001129406.1","https://www.ncbi.nlm.nih.gov/entrez/query.fcgi?db=gene&cmd=Retrieve&dopt=full_report&list_uids=4961468","MTASTVALALFVASILGHCWVTANSTGVASSTERSSPSTAGLSA RPSPGPTSVTTPGFYDVACSADSFSPSLSSFSSVWALINALLVVVATFFYLVYLCFFK FVDEVVHA","20.3542873944","2.127E-92"
"NC_009333","77835..78722","ORF54","ORF54","HHV8GK18_gp58","","deoxyuridine triphosphatase; herpesvirus core gene UL50 family","1","ORF54","YP_001129407.1","https://www.ncbi.nlm.nih.gov/entrez/query.fcgi?db=gene&cmd=Retrieve&dopt=full_report&list_uids=4961459","MQSDSAPLPRVEYVFETSKFRMTSRANEARLRLTNECPILVRPH EPFIMPTGIHFTRTPSCAFILTGETDKDVFCHTGLIDGGYRGEIQVILLNKRKYPVTL YRGELNICLSAFNYVLPPLRDVSFLTPPMYANDAGFDVMVMHSMVIPPTTDQPFMIYL GVETPGPPEPHVALALGRSGLASRGIVIDVSEWGPRGLQLKFYNYSGQPWLAQPGSRI CQIVFVERRHILKGFKKCLRHRKLAPGVRFREARVHFREDTNSVRKHTHEDNPVHEPN VATASADIRGTKGLGSSGF","2.297705688","0.0107892728"
"NC_009333","79535..82066","ORF56","ORF56","HHV8GK18_gp60","","primase subunit of helicase-primase complex; herpesvirus core gene UL52 family","1","ORF56","YP_001129409.1","https://www.ncbi.nlm.nih.gov/entrez/query.fcgi?db=gene&cmd=Retrieve&dopt=full_report&list_uids=4961445","METTYRREALTVRVIFCTSGDSAETIADVLTGAPTSASFFSVLH DLFYSQILAPRVTLKLCLPARRPGNGTRCSPVLVLRTDASVASGFLGGRPLEASDIKY MLLSDQTAGLFKPLLEIIGGARAPPNQDACTFQSQVAWLRTKFVTALRKLYKMTPSPY WMLSAFGAQEAQFVLTSSFYFFEHTVVCTTETVSHLSRLFSPQQGQTLVSVTSHEELG QLYGTSPFRRRVPAFVAYVKEKLARDSLETEAIDRTIDQIRGKLMLSNQDLVHFIYIS FYQCLNKRAFLRYSRQTSSSSALRELGEDPQLCGALHGEFRDHVQSYYHKKTYLSTYI DIRYVGGVLPDGYFGGSLVGERCVYWCGQSKDTASLLATISQQVPHLRLQNEFAGMLD VAALRGSDDGQFKEGLFSHSQALPLYRCEFLGKQFFTMLQEDGLERYWEQSVIFPGDQ DWDMLSDKDLTYRIFYHDLSLSLPTLKEQLLVSRHEYFNPRLPVYRWVLDFDLPVCRD IDRTFEEVHSLCCSLREAILDIIQLLGPVDPRTHPVYFFKSACPPDEWRGEDVASTSF CRCHDKLGMRIIVPFPEGVCVVGSEPMVALTGILNRTIKLDPELVHRFPSIQKKGGPF DCGIYGRGRSVRLPHCYKVGLVGELCRLLKILVCHPAPNGKAQYVRRAFTLRELLHHS PGHSAGHVGRIIYSIMDRNENFLENKTISYLPAKIPHIFQRIETLSGRSIEDWLHSAV WDKAYDTICKFFPDEKAQQFSHVAFTQQGENIIQLRPRQGRHFLCINHNHKNKSKTVR VFLTLHSIRVSEVTVTLMSQCFASKCNNNVPTAHFSFVVPVGLAS","13.4331092627","1.934E-41"
"NC_009333","join(82169..82217,82326..83644)","ORF57","ORF57","HHV8GK18_gp61","","post-transcriptional regulator; herpesvirus core gene UL54 family","1","ORF57","YP_001129410.1","https://www.ncbi.nlm.nih.gov/entrez/query.fcgi?db=gene&cmd=Retrieve&dopt=full_report&list_uids=4961525","MVQAMIDMDIMKGILEDSVSSSEFDESRDDETDAPTLEDEQLSE PAEPPADERIRGTQSAQGIPPPLGRIPKKSQGRSQLRSEIQFCSPLSRPRSPSPVNRY GKKIKFGTAGQNTRPPPEKRPRRRPRDRLQYGRTTRGGQCRAAPKRATRRPQVNCQRQ DDDVRQGVSDAVKKLRLPASMIIDGESPRFDDSIIPRHHGACFNVFIPAPPSHVPEVF TDRDITALIRAGGKDDELINKKISAKKIDHLHRQMLSFVTSRHNQAYWVSCRRETAAA GGLQTLGAFVEEQMTWAQTVVRHGGWFDEKDIDIILDTAIFVCNAFVTRFRLLHLSCV FDKQSELALIKQVAYLVAMGNRLVEACNLLGEVKLNFRGGLLLAFVLTIPGMQSRRSI SARGQELFRTLLEYYRPGDVMGLLNVIVMEHHSLCRNSECAAATRAAMGSAKFNKGLF FYPLS","3.5238128193","2.127E-4"
"NC_009333","complement(join(89700..90945,91042..91496))","vIRF-3","vIRF-3","HHV8GK18_gp64","","interferon regulatory factor","1","vIRF-3","YP_001129413.1","https://www.ncbi.nlm.nih.gov/entrez/query.fcgi?db=gene&cmd=Retrieve&dopt=full_report&list_uids=4961493","MAGRRLTWISEFIVGALDSDKYPLVKWLDRSTGTFLAPAARNDV IPLDSLQFFIDFKRECLSKGLHPRDLLGSPITAFGKICTTSRRLRRLPGEEYEVVQGI NCRRWRLLCAEVKECWWCVHARTHLHSGSSLWEILYQHSVRLEKHRRRPRPFVGENSD SSEEDHPAFCDVPVTQTGAESEDSGDEGPSTRHSASGVQPVDDANADSPGSGDEGPST RHSDSQPPPADETTVHTDNVEDDLTLLDKESACALMYHVGQEMDMLMRAMCDEDLFDL LGIPEDVIATSQPGGDTDASGVVTEGSIAASAVGAGVEDVYLAGALEAQNVAGEYVLE ISDEEVDDGAGLPPASRRRPVVGEFLWDDGPRRHERPTTRRIRHRKLRSAYYRVARPP VMITDRLGVEVFYFGRPAMSLEVERKVFILCSQNPLADISHSCLHSRKGLRVLLPKPD DNNTGPGDVNLLAAVLRSFASGLVIVSLRSGIYVKNLCKSTVLYHGNNPPKKFGVICG LSSRAVLDVFNVAQYRIQGHEHIKKTTVFIGGDPTSAEQFDMVPLVIKLRLRSVTCDD","9.2812712851","8.373E-21"
"NC_009333","complement(join(92066..93620,93742..94229))","vIRF-2","vIRF-2","HHV8GK18_gp65","","interferon regulatory factor","1","vIRF-2","YP_001129414.1","https://www.ncbi.nlm.nih.gov/entrez/query.fcgi?db=gene&cmd=Retrieve&dopt=full_report&list_uids=4961491","MPRYTESEWLTDFIIDALDSGRFWGVGWLDEQKRIFTVPGRNRR ERMPEGFDDFYEAFLEERRRHGLPEIPETETGLGCFGRLLRTANRARQERPFTIYKGK MKLNRWIMTPRPYKGCEGCLVYLTQEPAMKNMLKALFGIYPHDDKHREKALRRSLRKK AQREAARKQAAAVATPTTSSAAEVSSRSQSEDTESSDSENELWVGAQGFVGRDMHSLF FEEPEPSGFGSSGQSSSLLAPDSPRPSTSQVQGPLHVHTPTDLCLPTGGLPSPVIFPH ETQGLLAPPAGQSQTPFSPEGPVPSHVSGLDDCLPMVDHIEGCLLDLLSDVGQELPDL GDLGELLCETASPQGPMQSEGGEEGSTESVSVLPATHPLESSAPGASVMGSGQELPDL GDLSELLCETASPQGPMQSEGGEEGSTESVSVLPATHPLESSAPGASVMGSSFQASDN VDDFIDCIPPLCRDDRDVEDQEKADQTFYWYGSDMRPKVLTATQSVAAYLSKKQAIYK VGDKLVPLVVEVYYFGEKVKTHFDLTGGIVICSQVPEASPEHICQTVPPYKCLLPRTA HCSVDANRTLEQTLDRFSMGVVAIGTNMGIFLKGLLEYPAYFVGNASRRRIGKCRPLS HRHEIQQAFDVERHNREPEGSRYASLFLGRRPSPEYDWDHYPVILHIYLAPFYHRD","11.110437149","5.581E-29"
"NC_009333","complement(94577..95650)","ORF58","ORF58","HHV8GK18_gp68","","multiple transmembrane protein; herpesvirus core gene UL43 family","1","ORF58","YP_001129415.1","https://www.ncbi.nlm.nih.gov/entrez/query.fcgi?db=gene&cmd=Retrieve&dopt=full_report&list_uids=4961480","MCRLDSERALSLFSYLSGTLAATPFLWCFIFKALYSFTLFTTEI TAVFFWSLPVTHLALICMCLCPAAQKQLDRRLEWICASAVFAAVVCAAFSGFTFSRVP FIPGLCVLNCLLLLPYPLATATAVYQAPPIVHRYYELGFCGAFMVYYLLLFKKVFVSG VFWLPFIVFLVGGLLAFRHLEQHVYIRAGMQRRRAIFIMPGKYITYSVFQAWAYCRRE VVVFVTLLLATLISTASIGLLTPVLIGLDKYMTLFYVGLLSCVGVSVASRRALFVLLP LAAVLLTLVHILGSGPDMLLVRSCLCCLFLVSMLAAMGVEIQLIRRKLHRALNAPQMV LALCTVGNLCISCLLSVINKVVG","2.8341687825","2.297E-3"
"NC_009333","complement(96976..97893)","ORF60","ORF60","HHV8GK18_gp67","","ribonucleotide reductase small subunit; herpesvirus core gene UL40 family","1","ORF60","YP_001129417.1","https://www.ncbi.nlm.nih.gov/entrez/query.fcgi?db=gene&cmd=Retrieve&dopt=full_report&list_uids=4961455","MDSVDRFLYTSDHDGFLALTRETWQNRWFPSQIPLHLDVSHVHQ LSDADKDFYRFLFTFLGMAERLVNFNIEDLVTNFNSHDVAHYYAEQVAMENIHGVVYA NILKIFFNNSRGELLAYAAKIILDPALCEKLEWLHSRVRKATTKAQKILMFLIVEGIY FISSFYSISLCRVRGIMPGVCLANDYISRDELLHTKAASMLYNTMVEIQEKPSHAEVQ ALFREAVNIEIRFIQAKAAGVTLVNVVDIRRFLEATADRILRDIFVPPIFGTPPPEAC PLSYTGSFKAVNFFERDNSDYTTCVTDDL","11.0349251752","1.296E-28"
"NC_009333","complement(97922..100300)","ORF61","ORF61","HHV8GK18_gp66","","ribonucleotide reductase large subunit; herpesvirus core gene UL39 family","1","ORF61","YP_001129418.1","https://www.ncbi.nlm.nih.gov/entrez/query.fcgi?db=gene&cmd=Retrieve&dopt=full_report&list_uids=4961490","MSVRTFCQVHLGAVPPERRGSQVSAGQLSDFDMCAQSLIDFLKV RVGWDVRANAMAGRLWHQIMEARCPATLKQYLGIFRGVLGHRVESFIQKNIDALEDML CAYRRSKAYEDTLNCGYLSAVRLYDTYVLRTMGTEPVYESVAQMFMRVSVFVACQCLE HECLYWLARDLIEDAKSVSEMAIVEYVFGYLAAQHVCCATPILRSAGVEGGQLASCFI LQPSMMNEPGTLDALYHDMSPLLASKSGVGLDVTSFSHQKNIASCLKLVDAQVHYFND NNIRPVGASAYMELWHSQICDFLNAKLPENPDRCHSLFQGVCIPTLFFRMYEKDPSKL WYLFDPATAPNLIKLYGAAFDNEYERLVRAGKYVSCMPLKSMMFTLIHTIIKTGSPYV LLKEALNEHHWTDTQGMAINCSNLCAEIVQLPGRNTSVCNLANICLPKCLRTVESARV GTTDANRPFFCFEALGDAVRVAVLVINACILGGSHPTPGVERGQKERSMGIGVQGLAD VFAELGYGYLDAESAELDKNIFQSMYYTAVETSHNLVLEGQGVPFHGWEVSNFAKGRF HWQTWEGEDASFVPRHRWDALGKSIAEHGIFNSQFLAVMPTAGTSQVTGYAESVYPFF ANISSKVTNKEEVLRPNVTFFKKVLPDDLRVVRQYGGDVSTFPKHHRERYRVFLTAFD YCPFKLLDRARARAPFVDQSQSMSFFLKEDRVRNASYLRDLLLHGYRLGLKTLMYYCR VQKQSSLTALQCLADPGSPPHSGMKQDGAWLPGPKNPEEESCAADPECLVCQ","5.782881706","3.672E-9"
"NC_009333","101314..104100","ORF63","ORF63","HHV8GK18_gp71","","tegument protein; herpesvirus core gene UL37 family","1","ORF63","YP_001129420.1","https://www.ncbi.nlm.nih.gov/entrez/query.fcgi?db=gene&cmd=Retrieve&dopt=full_report&list_uids=4961466","MDGTDALEKLTKGLSGGGGSLHQTKLLMEFQLRGLPVPALLNSS TTEQFLNTVAQLPTDLSKFIRDYRVFALVRAAYFLEPPSSIDPLEAARALGRLVDILS SQPPQNTAPAQPPTSDDTLNNCTLLKLLAHYADQIAGFKTPALPPVPPGIIGLFTCVE QMYHACFQKYWAAALPPMWILTYDPPTSPLQDWLIVAYGNKEGLLLPSGIPSEEVLAK TLVTEHHELFVSRSNSTETAVTMPVSKERALAIYRVFAKGEVVAENTPILAFTDVELS TLKPHYLFIYDFIIEALCKSYTYSCTQARLESFLSRGIDFMTDLGQYLDTATSGKQQL THSQIKEIKYRLLSCGLSASACDVFRTVIMTLPYRPTPNLANLSTFMGMVHQLTMFGH YFYRCLGSYSPTGLAFTELQKILTRASAEQTERNPWRHPGISDIPLRWKISRALAFFV PPAPINTLQRVYAALPSQLMRAIFEISVKTTWGGAVPANLARDIDTGPNTQHISSTPP PTLKDVETYCQGLRVGDTEYDEDIVRSPLFADAFTKSHLLPILREVLENRLQKNRALF QIRWLIIFAAEAATGLIPARRPLARAYFHIMDILEERHSQDALYNLLDCIQELFTHIR QAVPDAQCPHAFLQSLFVFQFRPFVLKHQQGVTLFLDGLQTSLPPVISLANLGDKLCR LEFEYDSEGDFVRVPVAPPEQPPHVHLSHFKKTIQTIEQATREATVAMTTIAKPIYPA YIRLLQRLEYLNRLNHHILRIPFPQDALSELQETYLAAFARLTKLAADAANTCSYSLT KYFGVLFQHQLVPTAIVKKLLHFDEAKDTTEAFLQSLAQPVVQGQRQGAAGGSGVLTQ KELELLNKINPQFTDAQANIPPSIKRSYSNKYDVPEVSVDWETYSRSAFEAPDDELRF VPLTLAGLRKLFVE","4.4547297965","4.2E-6"
"NC_009333","complement(114669..114911)","ORF67A","ORF67A","HHV8GK18_gp73","DNA packaging","herpesvirus core gene UL33 family","1","ORF67A","YP_001129425.1","https://www.ncbi.nlm.nih.gov/entrez/query.fcgi?db=gene&cmd=Retrieve&dopt=full_report&list_uids=4961467","MEYASDQLLPRDMQILFPTIYCRLNAINYCQYLKTFLVQRAQPA ACDHTLVLESKVDTVRQVLRKIVSTDAVFSEARARP","6.0426393542","7.581E-10"
"NC_009333","115108..116511","HHV8GK18_gp77","","HHV8GK18_gp77","nuclear localization of capsids and DNA packaging","herpesvirus core gene UL32 family","1","ORF68","YP_001129426.1","https://www.ncbi.nlm.nih.gov/entrez/query.fcgi?db=gene&cmd=Retrieve&dopt=full_report&list_uids=4961470","MFVPWQLGTITRHRDELQKLLAASLLPEHPEESLGNPIMTQIHQ SLQPSSPCRVCQLLFSLVRDSSTPMGFFEDYACLCFFCLYAPHCWTSTMAAAADLCEI MHLHFPEEEATYGLFGPGRLMGIDLQLHFFVQKCFKTTAAEKILGISNLQFLKSEFIR GMLTGTITCNFCFKTSWPRTDKEEATGPTPCCQITDTTTAPASGIPELARATFCGASR PTKPSLLPALIDIWSTSSELLDEPRPRLIASDMSELKSVVASHDPFFSPPLQADTSQG PCLMHPTLGLRYKNGTASVCLLCECLAAHPEAPKALQTLQCEVMGHIENNVKLVDRIA FVLDNPFAMPYVSDPLLRELIRGCTPQEIHKHLFCDPLCALNAKVVSEDVLFRLPREQ EYKKLRASAAAGQLLDANTLFDCEVVQTLVFLFKGLQNARVGKTTSLDIIRELTAQLK RHRLDLAHPSQTSHLYA","3.789151465","7.558E-5"
"NC_009333","complement(122393..122959)","HHV8GK18_gp80","","HHV8GK18_gp80","","FLIP-like inhibitor of apoptosis; contains two death effector domains; ORF71; vFLIP","1","K13","YP_001129429.1","https://www.ncbi.nlm.nih.gov/entrez/query.fcgi?db=gene&cmd=Retrieve&dopt=full_report&list_uids=4961494","MATYEVLCEVARKLGTDDREVVLFLLNVFIPQPTLAQLIGALRA LKEEGRLTFPLLAECLFRAGRRDLLRDLLHLDPRFLERHLAGTMSYFSPYQLTVLHVD GELCARDIRSLIFLSKDTIGSRSTPQTFLHWVYCMENLDLLGPTDVDALMSMLRSLSR VDLQRQVQTLMGLHLSGPSHSQHYRHTP","10.4988001079","4.374E-26"
"NC_009333","complement(123042..123815)","HHV8GK18_gp82","","HHV8GK18_gp82","","cyclin D-like protein; contains two cyclin-like domains; vCyclin","1","ORF72","YP_001129430.1","https://www.ncbi.nlm.nih.gov/entrez/query.fcgi?db=gene&cmd=Retrieve&dopt=full_report&list_uids=4961471","MATANNPPSGLLDPTLCEDRIFYNILEIEPRFLTSDSVFGTFQQ SLTSHMRKLLGTWMFSVCQEYNLEPNVVALALNLLDRLLLIKQVSKEHFQKTGSACLL VASKLRSLTPISTSSLCYAAADSFSRQELIDQEKELLEKLAWRTEAVLATDVTSFLLL KLLGGSQHLDFWHHEVNTLITKALVDPKTGSLPASIISAAGCALLVPANVIPQDTHSG GVVPQLASILGCDVSVLQAAVEQILTSVSDFDLRILDSY","11.2703047434","9.197E-30"
"NC_009333","complement(124057..127446)","HHV8GK18_gp81","","HHV8GK18_gp81","maintenance of episomal genome","latent nuclear antigen; component of latency-associated nuclear antigen; LANA; LNA; ORF73","1","LANA","YP_001129431.1","https://www.ncbi.nlm.nih.gov/entrez/query.fcgi?db=gene&cmd=Retrieve&dopt=full_report&list_uids=4961527","MAPPGMRLRSGRSTGAPLTRGSCRKRNRSPERCDLGDDLHLQPR RKHVADSVDGRECGPHTLPIPGSPTVFTSGLPAFVSSPTLPVAPIPSPAPATPLPPPA LLPPVTTSSSPIPPSHPVSPGTTDTHSPSPALPPTQSPESSQRPPLSSPTGRPDSSTP MRPPPSQQTTPPHSPTTPPPEPPSKSSPDSLAPSTLRSLRKRRLSSPQGPSTLNPICQ SPPVSPPRCDFANRSVYPPWATESPIYVGSSSDGDTPPRQPPTSPISIGSSSPSEGSW GDDTAMLVLLAEIAEEASKNEKECSENNQAGEDNGDNEISKESQVDKDDNDNKDDEEE QETDEEDEEDDEEDDEEDDEEDDEEDDEEDDEEDDEEEDEEEDEEEDEEEDEEEEEDE EDDDDEDNEDEEDDEEEDKKEDEEDGGDGNKTLSIQSSQQQQEPQQQEPQQQEPQQQE PQQQEPQQQEPQQQEPQQQEPQQREPQQREPQQREPQQREPQQREPQQREPQQREPQQ REPQQREPQQREPQQREPQQREPQQQEPQQQEPQQQEPQQQEPQQQEPQQQEPQQQEP QQQEPQQQEPQQQEPQQQEPQQQEPQQQDEQQQDEQQQDEQQQDEQQQDEQQQDEQQQ DEQQQDEQEQQDEQQQDEQQQQDEQEQQEEQEQQEEQQQDEQQQDEQQQDEQQQDEQE QQDEQQQDEQQQQDEQEQQEEQEQQEEQEQQEEQEQQEEQEQELEEQEQELEEQEQEL EEQEQELEEQEQELEEQEQELEEQEQELEEQEQELEEQEQELEEQEQELEEQEQELEE QEQELEEQEQELEEQEQELEEQEQEQELEEVEEQEQEQEEQELEEVEEQEQEQEEQEE QELEEVEEQEEQELEEVEEQEEQELEEVEEQEQQGVEQQEQETVEEPIILHGSSSEDE MEVDYPVVSTHEQIASSPPGDNTPDDDPQPGPSREYRYVLRTSPPHRPGVRMRRVPVT HPKKPHPRYQQPPVPYRQIDDCPAKARPQHIFYRRFLGKDGRRDPKCQWKFAVIFWGN DPYGLKKLSQAFQFGGVKAGPVSCLPHPGPDQSPITYCVYVYCQNKDTSKKVQMARLA WEASHPLAGNLQSSIVKFKKPLPLTQPGENQGPGDSPQEMT","24.6489982219","1.886E-134"
"NC_009333","129520..130548","HHV8GK18_gp84","","HHV8GK18_gp84","","G protein-coupled receptor; similar to IL-8 receptor; transforming protein; vGPCR","1","ORF74","YP_001129433.1","https://www.ncbi.nlm.nih.gov/entrez/query.fcgi?db=gene&cmd=Retrieve&dopt=full_report&list_uids=4961460","MAAEDFLTIFLDDDESWNETLNMSGYDYSGNFSLEVSVCEMTTV VPYTWNVGILSLIFLINVLGNGLVTYIFCKHRSRAGAIDILLLGICLNSLCLSISLLA EVLMFLFPNIISTGLCRLEIFFYYLYVYLDIFSVVCVSLVRYLLVAYSTRSWPKKQSL GWVLTSAALLIALVLSGDACRHRSRVVDPVSKQAMCYENAGNMTADWRLHVRTVSVTA GFLLPLALLILFYALTWCVVRRTKLQARRKVRGVIVAVVLLFFVFCFPYHVLNLLDTL LRRRWIRDSCYTRGLINVGLAVTSLLQALYSAVVPLIYSCLGSLFRQRMYGLFQSLRQ SFMSGATT","30.1009751532","2.353E-199"
"NC_009333","complement(join(134824..135287,135373..135474,135557..135664,135747..135899,135977..136066,136155..136397,136481..136573,136683..136899))","K15","K15","HHV8GK18_gp85","","signal transducing membrane protein; LAMP","1","K15","YP_001129435.1","https://www.ncbi.nlm.nih.gov/entrez/query.fcgi?db=gene&cmd=Retrieve&dopt=full_report&list_uids=4961473","MKTLIFFWNLWLWALLVCFWCITLVCVTTNSIDTMASLLVMCIL FVSAINKYTQAISSNNPKWPSSWHLGIIACIVLKLWNLSTTNSVTYACLITTAILSLV TAFLTLIKHCTACKLQLEHGILFTSTFAVLMTNMLVHMSNTWQSSWIFFPISFTLSLP FLYAFATVKTGNIKLVSSVSFICAGLVMGYPVSCCKTHTCTATAAGLSLSSIYLGFTG IISTLHKSWAPPKRGILTFLLLQGGVLTTQTLTTELLAITSTTGNIKGHEILLLVCLI FLWCLYVWQSFNKASLVTGMLHLIAAWSHTGGCVQLVMLLPSGLTRGILTMIICISTL FSTLQGLLVFYLYKEKKVVAVNSYRQRRRRIYTRDQNLHHNDNHLGNNVISPPPLPPF FRQPVRLPSHVTDRGRGSQLLNEVELQEVNRDPPNVFGYASILVSGAEESREPSPQPD QSGMSILRVDGGSAFRIDTAQAATQPTDDLYEEVLFPRN","58.768264086","0"
