# Supplementary material for: Epigenetic Reprogramming of Kaposi’s Sarcoma-Associated Herpesvirus during Hypoxic Reactivation
Source: Cancers (Basel). 2022 Nov 2;14(21):5396. doi: 10.3390/cancers14215396 (PMC9654037; doi:10.3390/cancers14215396)
Supplement: Supplementary file 1 [file cancers-14-05396-s001.zip › H3K9Me3 Hypoxia.xls]

## Sheet: Tmp export tabular
Chromosome	Region	Name	gene	locus_tag	function	note	codon_start	product	protein_id	GeneID	translation	Peak shape score	P-value
NC_009333	105..944	K1	K1	HHV8GK18_gp01		ITAM-containing signal transducing membrane glycoprotein; contains an Ig domain	1	K1	YP_001129350.1	4961511	MFLYVVCSLAVCFRGLLSLSLQSSPNLCPGVISTPYTLTCPSNT SLPTSWYCNDTRLLRVTQGTLTVDTLICNFSCVGQSGHRYSLWITWYAQPVLQTFCGQ PSNTVTCGQHVTLYCSTSGNNVTVWHLPNGQNETVSQTKYYNFTLMNQTEGCYACSNG LSSRLSNRLCFSARCANITPETHTVSVSSTTGFRTFATAPTLFVMKEVKSTYLYIQEH LLVFMTLVALIGTMCGILGTIIFAHCQKQRDSNKTVPQQLQDYYSLHDLCTEDYTQPV DWY	185.055	0
NC_009333	1112..2764	ORF4	ORF4	HHV8GK18_gp02		complement control protein; membrane protein; contains four SCR domains	1	KCP	YP_001129351.1	4961488	MAFLRQTLWILWTFTMVIGQDNEKCSQKTLIGYRLKMSRDGDIA VGETVELRCRSGYTTYARNITATCLQGGTWSEPTATCNKKSCPNPGEIQNGKVIFHGG QDALKYGANISYVCNEGYFLVGREYVRYCMIGASGQMAWSSSPPFCEKEKCHRPKIEN GDFKPDKDYYEYNDAVHFECNEGYTLVGPHSIACAVNNTWTSNMPTCELAGCKFPSVT HGYPIQGFSLTYKHKQSVTFACNDGFVLRGSPTITCNVTEWDPPLPKCVLEDIDDPNN SNPGRLHPTPNEKPNGNVFQRSNYTEPPTKPEDTHTAATCDTNCEQPPKILPTSEGFN ETTTSNTITKQLEDEKTTSQPNTHITSALTSMKAKGNFTNKTNNSTDLHIASTPTSQD …	233.273	0
NC_009333	3179..6577	ORF6	ORF6	HHV8GK18_gp03		single-stranded DNA-binding protein; herpesvirus core gene UL29 family	1	ORF6	YP_001129352.1	4961521	MALKGPQTLEENIGSAAPTGPCGYLYAYVTHNFPIGEASLLGNG YPEAKVFSLPLLHGLTVESDFPLNVKAVHKKIDATTASVKLTSYHREAIVFHNTHLFQ PIFQGKGLEKLCRESRELFGFSTFVEQQHKGTLWSPEACPQLPCANEIFMAVIVTEGF KERLYGGKLVPVPSQTTPVHIGEHQAFKIPLYDEDLFGPSRAQELCRFYNPDISRYLH DSIFTGIAQALRVKDVSTVIQASERQFVHDQYKIPKLVQAKDFPQCASRGTDGSTLMV IDSLVAELGMSYGLSFIEGPQDSCEVLNYDTWPIFENCETPDARLRALEVWHAEQALH IGAQLFAANSVLYLTRVAKLPQKNQRGDANMYNSFYLQHGLGYLSEATVKENGASAFK …	63.6362	0
NC_009333	6594..8681	ORF7	ORF7	HHV8GK18_gp04		subunit of terminase; herpesvirus core gene UL28 family	1	ORF7	YP_001129353.1	4961505	MAKELAAVYADVSALAMDLCLLSYADPATLDTKSLALTTGKFQS LHGTLLPLLRRQNAHECSGLSLELEHLLENVADALTTLGVCTSRKLSPEEHFSLLHLD ITCNKHRSVRFNFYGNWALELKLSLINDVEIFFKRLSSVFYCIGSGSALEGLGEVLRF VGKLRGISPVPGPDLYVSNLPCLECLQEVCLTPNQGTSLQAMLPDTACSHICTPACGE PVRGLFENELKQLGLQTPESIPTTPCQSRVRQDDEIRQSSLMAVGDHHIFGEVTRSVL EISNLIYWSSGHSDATCDGDRDCSHLASLFTHEADMHKRRVDLAGCLGERGTPKHFFD CFRPDSLETLFCGGLFSSVEDTIESLQKDCSSAFYQQVNYTTALQKQNEFYVRLSKLL …	43.2438	0
NC_009333	8665..11202	ORF8	ORF8	HHV8GK18_gp05		envelope glycoprotein gB; herpesvirus core gene UL27 family	1	ORF8	YP_001129354.1	4961501	MTPRSRLATLGTVILLVCFCAGAAHSRGDTFQTSSSPTPPGSSS KAPTKPGEEASGPKSVDFYQFRVCSASITGELFRFNLEQTCPDTKDKYHQEGILLVYK KNIVPHIFKVRRYRKIATSVTVYRGLTESAITNKYELPRPVPLYEISHMDSTYQCFSS MKVNVNGVENTFTDRDDVNTTVFLQPVEGLTDNIQRYFSQPVIYAEPGWFPGIYRVRT TVNCEIVDMIARSAEPYNYFVTSLGDTVEVSPFCYNESSCSTTPSNKNGLSVQVVLNH TVVTYSDRGTSPTPQNRIFVETGAYTLSWASESKTTAVCPLALWKTFPRSIQTTHEDS FHFVANEITATFTAPLTPVANFTDTYSCLTSDINTTLNASKAKLASTHVPNGTVQYFH …	11.5242	4.98097e-31
NC_009333	11329..14367	ORF9	ORF9	HHV8GK18_gp06		DNA polymerase catalytic subunit; herpesvirus core gene UL30 family	1	ORF9	YP_001129355.1	4961513	MDFFNPFIDPTRGGPRNTVRQPTPSQSPTVPSETRVCRLIPACF QTPGRPGVVAVDTTFPPTYFQGPKRGEVFAGETGSIWKTRRGQARNAPMSHLIFHVYD IVETTYTADRCEDVPFSFQTDIIPSGTVLKLLGRTLDGASVCVNVFRQRCYFYTLAPQ GVNLTHVLQQALQAGFGRASCGFSTEPVRKKILRAYDTQQYAVQKITLSSSPMMRTLS DRLTTCGCEVFESNVDAIRRFVLDHGFSTFGWYECSNPAPRTQARDSWTELEFDCSWE DLKFIPERTEWPPYTILSFDIECMGEKGFPNATQDEDMIIQISCVLHTVGNDKPYTRM LLGLGTCDPLPGVEVFEFPSEYDMLAAFLSMLRDYNVEFITGYNIANFDLPYIIARAT …	14.0642	3.14957e-45
NC_009333	15756..16979	ORF11	ORF11	HHV8GK18_gp08		derived from herpesvirus dUTPase; related to HHV-5 UL82, UL83 and UL84	1	ORF11	YP_001129357.1	4961439	MAQESEQCSRAFAVCSSKRQLGRGEPVWDSVIHPSHIVISNRVP LLLREQNICLPSCPSVGQILHRAYPNFTFDNTHRKQQTETYTAFYAFGDQNNKVRILP TVVESSSSVLIFRLRASVSANIAVGGLKIIILALTLVHAQGVYLRCGKDLSTPHCAPA IVQREVLSSGFEPQFTVTGIPVTSSNLNQCYFLVRKPKSRLAKPFARLSAETTEECRV RSIRLGKTHLRISVTAPAQETPVWGLVTTSFSLTPTAPLAFDRNPYNHETFACNARHY IPVIYSGPKITLAPRGRQVVWHNNSYTSSLPCKVTAIVSNHCCNCDIFLEDSEWRPNK PAPLKLVNTSDHPVILEPDTHIGNALFIIAPKARGLRRLTRLTTKTIELPGGVKIDSR …	1.88201	0.029917
NC_009333	complement(17227..17841)	K2	K2	HHV8GK18_gp10		interleukin-6; vIL-6	1	K2	YP_001129358.1	4961449	MRWFKLWSILLVGSLLVSGTRGKLPDAPEFEKDLLIQRLNWMLW VIDECFRDLCYRTGICKGILEPAAIFHLKLPAINDTDHCGLIGFNETSCLKKLADGFF EFEVLFKFLTTEFGKSVINVDVMELLTKTLGWDIQEELNKLTKTHYSPPKFDRGLLGR LQGLKYWVRHFASFYVLSAMEKFAGQAVRVLNSIPDVTPDVHDK	39.3653	0
NC_009333	complement(18574..19542)	K3	K3	HHV8GK18_gp11	downregulation of MHC-I	E3 ubiquitin ligase; membrane protein; related to K5; MIR1; ORF12	1	K3	YP_001129360.1	4961486	MEDEDVPVCWICNEELGNERFRACGCTGELENVHRSCLSTWLTI SRNTACQICGVVYNTRVVWRPLREMTLLPRLTYQEGLELIVFIFIMTLGAAGLAAATW VWLYIVGGHDPEIDHVAAAAYYVFFVFYQLFVVFGLGAFFHMMRHVGRAYAAVNTRVE VFPYRPRPTSPECAVEEIELQEILPRGDNQDEEGPAGAAPGDQDGPADGAPVHRDSEE SVDEAAGYKEAGEPTHNDGRDDNVEPTAVGCDCNNLGAERYRATYCGGYVGAQSGDGA YSVSCHNKAGPSSLVDILPQGLLGGGYGSMGVIRKRSAVSSALMFH	47.0895	0
NC_009333	complement(20023..21036)	ORF70	ORF70	HHV8GK18_gp12		thymidylate synthase	1	ORF70	YP_001129361.1	4961481	MFPFVPLSLYVAKKLFRARGFRFCQKPGVLALAPEVDPCSIQHE VTGAETPHEELQYLRQLREILCRGSDRLDRTGIGTLSLFGMQARYSLRDHFPLLTTKR VFWRGVVQELLWFLKGSTDSRELSRTGVKIWDKNGSREFLAGRGLAHRREGDLGPVYG FQWRHFGAAYVDADADYTGQGFDQLSYIVDLIKNNPHDRRIIMCAWNPADLSLMALPP CHLLCQFYVADGELSCQLYQRSGDMGLGVPFNIASYSLLTYMLAHVTGLRPGEFIHTL GDAHIYKTHIEPLRLQLTRTPRPFPRLEILRSVSSMEEFTPDDFRLVDYCPHPTIRME MAV	36.1384	2.82883e-286
NC_009333	complement(21480..21764)	K4	K4	HHV8GK18_gp13		interleukin 8-like CC chemokine; vCCL-2; vMIP-II	1	K4	YP_001129362.1	4961514	MDTKGILLVAVLTALLCLQSGDTLGASWHRPDKCCLGYQKRPLP QVLLSSWYPTSQLCSKPGVIFLTKRGRQVCADKSKDWVKKLMQQLPVTAR	25.9973	2.65301e-149
NC_009333	complement(22530..23078)	K4.2	K4.2	HHV8GK18_gp14		contains hydrophobic domains	1	K4.2	YP_001129364.1	4961450	MQISFAEVLGKPVGRAGFLDRGKWDRCPLYDLFSHLATSATFSG TASGFGAVSGVLPGSCSGIAWSIKPGNYDPLIPFETLMTWDIGSKNPRLTKYWTLLTT SAAPGVSPVSSCFVFGGGGRGECLVSVLLLFFCVCTFGCFGKPYRCAIFWVIHKLHLA TLVFIVAFGEEKRGDPWSPGLQ	100.813	0
NC_009333	complement(25865..26635)	K5	K5	HHV8GK18_gp16	downregulation of MHC-I	E3 ubiquitin ligase; membrane protein; related to K3; MIR2	1	K5	YP_001129365.1	4961442	MASKDVEEGVEGPICWICREEVGNEGIHPCACTGELDVVHPQCL STWLTVSRNTACQMCRVIYRTRTQWRSRLNLWPEMERQEIFELFLLMSVVVAGLVGVA LCTWTLLVILTAPAGTFSPGAVLGFLCFFGFYQIFIVFAFGGICRVSGTVRALYAANN TRVTVLPYRRPRRPTANEDNIELTVLVGPAGGTDEEPTDESSEGDVASGDKERDGSSG DEPDGGPNDRAGLRGTARTDLCAPTKKPVRKNHPKNNG	77.6914	0
NC_009333	30242..30769	ORF16	ORF16	HHV8GK18_gp19		bcl-2-like inhibitor of apoptosis; vBcl-2	1	ORF16	YP_001129368.1	4961447	MDEDVLPGEVLAIEGIFMACGLNEPEYLYHPLLSPIKLYITGLM RDKESLFEAMLANVRFHSTTGINQLGLSMLQVSGDGNMNWGRALAILTFGSFVAQKLS NEPHLRDFALAVLPVYAYEAIGPQWFRARGGWRGLKAYCTQVLTRRRGRRMTALLGSI ALLATILAAVAMSRR	10.2036	9.55338e-25
NC_009333	complement(30920..31786)	ORF17.5	ORF17.5	HHV8GK18_gp21		major capsid scaffold protein; herpesvirus core gene UL26.5 family	1	ORF17.5	YP_001129370.1	4961482	MNSSGQEDIISIPKSAFLSMLQSSIDGMKTTAAKMSHTLSGPGL MGCGGQMFPTDHHLPSYVSNPAPPYGYAYKNPYDPWYYSPQLPGYRTGKRKRGAEDDE GHLFPGEEPAYHKDILSMSKNIAEIQSELKEMKLNGWHAGPPPSSSAAAAAVDPHYRP HANSAAPCQFPTMKEHGGTYVHPPIYVQAPHGQFQQAAPILFAQPHVSHPPVSTGLAV VGAPPAEPTPASSTQSIQQQAPETTHTPCAAVEKDAPTPNPTSNRVEASSRSSPKSKI RKMFCEELLNKQ	2.08153	0.0186927
NC_009333	complement(30920..32524)	ORF17	ORF17	HHV8GK18_gp20		capsid maturational protease; minor capsid scaffold protein; herpesvirus core gene UL26 family	1	ORF17	YP_001129369.1	4961478	MAQGLYVGGFVDVVSCPKLEQELYLDPDQVTDYLPVTEPLPITI EHLPETEVGWTLGLFQVSHGIFCTGAITSPAFLELASRLADTSHVARAPVKNLPKEPL LEILHTWLPGLSLSSIHPRELSQTPSGPVFQHVSLCALGRRRGTVAVYGHDAEWVVSR FSSVSKSERAHILQHVSSCRLEDLSTPNFVSPLETLMAKAIDASFIRDRLDLLKTDRG VASILSPAYLKASQFPVGIQAVTPPRPAMNSSGQEDIISIPKSAFLSMLQSSIDGMKT TAAKMSHTLSGPGLMGCGGQMFPTDHHLPSYVSNPAPPYGYAYKNPYDPWYYSPQLPG YRTGKRKRGAEDDEGHLFPGEEPAYHKDILSMSKNIAEIQSELKEMKLNGWHAGPPPS …	3.93464	4.16608e-05
NC_009333	32523..33296	ORF18	ORF18	HHV8GK18_gp22		related to HHV-5 UL79	1	ORF18	YP_001129371.1	4961499	MLGKYVCETEPLSPGLRRLMWRFLQNKNLNTFHAQELRFIHLVL CKMYNFGLNVYLLREATANAGTYDEVVLGRKVPAEVWKLVYDGLEEMGVSSEMLLCEA YRDSLWMHLNDKVGLLRGLANYLFHRLGVTHDVRIAPENLVDGNFLFNLGSVLPCRLL LAAGYCLAFWGSDEHERWVRFFAQKLFICYLIVSGRLMPQRSLLVWASETGYPGPVEA VCRDIRSMYGIRTYAVSGYLPAPSEAQLAYLGAFNNNAV	13.2623	1.91514e-40
NC_009333	complement(34710..35483)	ORF20	ORF20	HHV8GK18_gp23		nuclear protein; herpesvirus core gene UL24 family	1	ORF20	YP_001129373.1	4961477	MVRPTEAEVKKSLSRLPAARKRAGNRAHLATYRRLLKYSTLPDL WRFLSSRPQNPPLGHHRLFFEVTLGHRIADCVILVSGGHQPVCYVVELKTCLSHQLIP TNTVRTSQRAQGLCQLSDSIHYIAHSAPPGTEAWTITPLLIFKNQKTLKTVYSESPGA FPTPVHTTEGKLCAFLTARENADIRKVLSKVPKKPKMDRGGKILGPTPGKRAVYSQAH HGRNKKGRPWTAQPTRAKSRTKDKGTPAFPRAGPACSGP	3.14942	0.00081797
NC_009333	35482..37224	ORF21	ORF21	HHV8GK18_gp25		thymidine kinase; herpesvirus core gene UL23 family	1	ORF21	YP_001129374.1	4961484	MAEGGFGADSVGRGGEKASVTRGGRWDLGSSDDESSTSTTSTDM DDLPEERKPLTGKSVKTSYIYDVPTVPTSKPWHLMHDNSLYATPRFPPRPLIRHPSEK GSIFASRLSATDDDSGDYAPMDRFAFQSPRVCGRPPLPPPNHPPPATRPADASMGDVG WADLQGLKRTPKGFLKTSTKGGSLKARGRDVGDRLRDGGFAFSPRGVKSAIGQNIKSW LGIGESSATAVPVTTQLMVPVHLIRTPVTVDYRNVYLLYLEGVMGVGKSTLVNAVCGI LPQERVTSFPEPMVYWTRAFTDCYKEISHLMKSGKAGDPLTSAKIYSCQNKFSLPFRT NATAILRMMQPWNVGGGSGRGTHWCVFDRHLLSPAVVFPLMHLKHGRLSFDHFFQLLS …	20.315	4.73552e-92
NC_009333	37212..39404	ORF22	ORF22	HHV8GK18_gp26		envelope glycoprotein gH; herpesvirus core gene UL22 family	1	ORF22	YP_001129375.1	4961506	MQGLAFLAALACWRCISLTCGATGALPTTATTITRSATQLINGR TNLSIELEFNGTSFFLNWQNLLNVITEPALTELWTSAEVAEDLRVTLKKRQSLFFPNK TVVISGDGHRYTCEVPTSSQTYNITKGFNYSALPGHLGGFGINARLVLGDIFASKWSL FARDTPEYRVFYPMNVMAVKFSISIGNNESGVALYGVVSEDFVVVTLHNRSKEANETA SHLLFGLPDSLPSLKGHATYDELTFARNAKYALVAILPKDSYQTLLTENYTRIFLNMT ESTPLEFTRTIQTRIVSIEARRACAAQEAAPDIFLVLFQMLVAHFLVARGIAEHRFVE VDCVCRQYAELYFLRRISRLCMPTFTTVGYNHTTLGAVAATQIARVSATKLASLPRSS …	50.4108	0
NC_009333	complement(39401..40615)	ORF23	ORF23	HHV8GK18_gp28		tegument protein; herpesvirus core gene UL21 family	1	ORF23	YP_001129376.1	4961503	MLRVPDVKASLVEGAARLSTGERVFHVLTSPAVAAMVGVSNPEV PMPLLFEKFGTPDSSTLPLYAARHPELSLLRIMLSPHPYALRSHLCVGEETASLGVYL HSKPVVRGHEFEDTQILPECRLAITSDQSYTNFKIIDLPAGCRRVPIHAANKRVVIDE AANRIKVFDPESPLPRHPITPRAGQTRSILKHNIAQVCERDIVSLNTDNEAASMFYMI GLRRPRLGESPVCDFNTVTIMERANNSITFLPKLKLNRLQHLFLKHVLLRSMGLENIV SCFSSLYGAELAPAKTHEREFFGALLERLKRRVEDAVFCLNTIEDFPFREPIRQPPDC SKVLIEAMEKYFMMCSPKDRQSAAWLGAGVVELICDGNPLSEVLGFLAKYMPIQKECT …	3.2834	0.000512819
NC_009333	complement(40619..42877)	ORF24	ORF24	HHV8GK18_gp27		related to HHV-5 UL87	1	ORF24	YP_001129377.1	4961485	MAALEGPLLLPPSASLTTSPQTTCYQATWESQLEIFCCLATNSH LQAELTLEGLDKMMQPEPTFFACRAIRRLLLGERLHPFIHQEGTLLGKVGRRYSGEGL IIDGGGVFTRGQIDTDNYLPAVGSWELTDDCDKPCEFRELRSLYLPALLTCTICYKAM FRIVCRYLEFWEFEQCFHAFLAVLPHSLQPTIYQNYFALLESLKHLSFSIMPPASPDA QLHFLKFNISSFMATWGWHGELVSLRRAIAHNVERLPTVLKNLSKQSKHQDVKVNGRD LVGFQLALNQLVSRLHVKIQRKDPGPKPYRVVVSTPDCTYYLVYPGTPAIYRLVMCMA VADCIGHSCSGLHPCANFLGTHETPRLLAATLSRIRYAPKDRRAAMKGNLQACFQRYA …	31.5634	5.87326e-219
NC_009333	42876..47006	ORF25	ORF25	HHV8GK18_gp29		major capsid protein; herpesvirus core gene UL19 family	1	ORF25	YP_001129378.1	4961452	MEATLEQRPFPYLATEANLLTQIKESAADGLFKSFQLLLGKDAR EGSVRFEALLGVYTNVVEFVKFLETALAAACVNTEFKDLRRMIDGKIQFKISMPTIAH GDGRRPNKQRQYIVMKACNKHHIGAEIELAAADIELLFAEKETPLDFTEYAGAIKTIT SALQFGMDALERGLVDTVLAVKLRHAPPVFILKTLGDPVYSERGLKKAVKSDMVSMFK AHLIEHSFFLDKAELMTRGKQYVLTMLSDMLAAVCEDTVFKGVSTYTTASGQQVAGVL ETTDSVMRRLMNLLGQVESAMSGPAAYASYVVRGANLVTAVSYGRAMRNFEQFMARIV DHPNALPSVEGDKAALADGHDEIQRTRIAASLVKIGDKFVAIESLQRMYNETQFPCPL …	6.03163	8.1156e-10
NC_009333	47973..48845	ORF27	ORF27	HHV8GK18_gp31			1	ORF27	YP_001129380.1	4961487	MASSDILSVARTDDGSVCEVSLRGGRKKTTVYLPDTEPWVVETD AIKDAFLSDGIVDMARKLHRGALPSNSHNGLRMVLFCYCYLQNCVYLALFLCPLNPYL VTPSSIEFAEPVVAPEVLFPHPAEMSRGCDDAIFCKLPYTVPIINTTFGRIYPNSTRE PDGRPTDYSMALRRAFAVMVNTSCAGVTLCRGETQTASRNHTEWENLLAMFSVIIYAL DHNCHPEALSIASGIFDERDYGLFISQPRSVPSPTPCDVSWEDIYNGTYLARPGNCDP WPNLSTPPLILNFK	48.9077	0
NC_009333	complement(join(49462..50604,53855..54775))	ORF29	ORF29	HHV8GK18_gp33		putative ATPase subunit of terminase; herpesvirus core gene UL15 family	1	ORF29	YP_001129382.1	4961443	MLLSRHRERLAANLQETAKDAGERWELSAPTFTRHCPKTARMAH PFIGVVHRINSYSSVLETYCTRHHPATPTSANPDVGTPRPSEDNVPAKPRLLESLSTY LQMRCVREDAHVSTADQLVEYQAARKTHDSLHACSVYRELQAFLVNLSSFLNGCYVPG VHWLEPFQQQLVMHTFFFLVSIKAPQKTHQLFGLFKQYFGLFETPNSVLQTFKQKASV FLIPRRHGKTWIVVAIISMLLASVENINIGYVAHQKHVANSVFAEIIKTLCRWFPPKN LNIKKENGTIIYTRPGGRSSSLMCATCFNKNSIRGQTFNLLYVDEANFIKKDALPAIL GFMLQKDAKLIFISSVNSSDRSTSFLLNLRNAQEKMLNVVSYVCADHREDFHLQDALV …	14.4015	2.53191e-47
NC_009333	50723..50956	ORF30	ORF30	HHV8GK18_gp34		related to HHV-5 UL91	1	ORF30	YP_001129383.1	4961433	MGEPVDPGHVVNEKDFEECEQFFSQPLREQVVAGVRALDGLGLA DSLCHKTERLCLLMDLVGTECFARVCRLDTGAK	30.847	3.07481e-209
NC_009333	50953..51537	ORF31	ORF31	HHV8GK18_gp35		related to HHV-5 UL92	1	ORF31	YP_001129384.1	4961498	MKSVASPLCQFHGVFCLYQCRQCLAYHVCDGGAECVLLHTPESV ICELTGNCMLGNIQEGQFLGPVPYRTLDNQVDRDAYHGMLACLKRDIVRYLQTWPDTT VIVQEIALGDGVTDTISAIIDETFGECLPVLGEAQGGYALVCSMYLHVIVSIYSTKTV YNSMLFKCTKNKKYDCIAKRVRTKWMRMLSTKDT	27.9389	4.49038e-172
NC_009333	52861..53865	ORF33	ORF33	HHV8GK18_gp37		tegument protein; herpesvirus core gene UL16 family	1	ORF33	YP_001129386.1	4961502	MASRRRKLRNFLNKECIWTVNPMSGDHIKVFNACTSISPVYDPE LVTSYALSVPAYNVSVAILLHKVMGPCVAVGINGEMIMYVVSQCVSVRPVPGRDGMAL IYFGQFLEEASGLRFPYIAPPPSREHVPDLTRQELVHTSQVVRRGDLTNCTMGLEFRN VNPFVWLGGGSVWLLFLGVDYMAFCPGVDGMPSLARVAALLTRCDHPDCVHCHGLRGH VNVFRGYCSAQSPGLSNICPCIKSCGTGNGVTRVTGNRNFLGLLFDPIVQSRVTALKI TSHPTPTHVENVLTGVLDDGTLVPSSKAPWVLLRMSDYFSRLLIYECKKLKALGLRSY	7.00138	1.26728e-12
NC_009333	54774..55757	ORF34	ORF34	HHV8GK18_gp38		related to HHV-5 UL95	1	ORF34	YP_001129387.1	4961504	MFALSSLVSEGDPEVTSRYVKGVQLALDLSENTPGQFKLIETPL NSFLLVSNVMPEVQPICSGLPALRPDFSNLHLPRLEKLQRVLGQGFGAAGEEIALDPS HVETHEKGQVFYNHYATEEWTWALTLNKDALLREAVDGLCDPGTWKGLLPDDPLPLLW LLFNGPASFCRADCCLYKQHCGYPGPVLLPGHMYAPKRDLLSFVNHALKYTKFLYGDF SGTWAAACRPPFATSRIQRVVSQMKIIDASDTYISHTCLLCHIYQQNSIIAGQGTHVG GILLLSGKGTQYITGNVQTQRCPTTGDYLIIPSYDIPAIITMIKENGLNQL	18.482	1.44105e-76
NC_009333	55738..56190	ORF35	ORF35	HHV8GK18_gp39		tegument protein; herpesvirus core gene UL14 family	1	ORF35	YP_001129388.1	4961512	MDSTNSKREFIKSALEANINRRAAVSLFDRFGGSSAVFEKQFQD AQHAVRAHGALKREAELGTLVRKAGQRFEALKRERSILRQPRDLPRVADIDALVDAVA DLKEEVAVRLDALEENGEETPTHSSSEIKDTIVRWRLDDLPPVCPETP	39.7671	0
NC_009333	56075..57409	ORF36	ORF36	HHV8GK18_gp40		serine-threonine protein kinase; herpesvirus core gene UL13 family	1	ORF36	YP_001129389.1	4961434	MRWKRMERRPPLTPLRRSRTQSSGGGLTICPRCALKLPKATRIS ERPWASTWQLNQHIQVSKTKKATAYLKAPREWGQCTHQDPDWSKRLGRGAFGIIVPIS EDLCVKQFDSRREFFYEAIANDLMQATRERYPMHSGGSRLLGFVQPCIPCRSIVYPRM KCNLLQLDWSQVNLSVMAAEFTGLMAAVSFLNRYCGMVHCDVSPDNILATGDLTPMNP GRLVLTDFGSVALHSGSKWTNLVVTSNLGFKQHCYDFRVPPKLICKHLYKPSCVLFQC YLSSLGKMHAQVLDQPYPISPNMGLTIDMSSLGYTLLTCLELYLDLPLNNPLKFLGSA TRDGRPEPMYYLGFMIPRVVMTQILSAVWTMTLDLGLDCTGKAQAIPMRQEHQLAFQK …	15.1191	6.05753e-52
NC_009333	57372..58832	ORF37	ORF37	HHV8GK18_gp41	host shutoff	deoxyribonuclease; herpesvirus core gene UL12 family; SOX	1	ORF37	YP_001129390.1	4961483	MEATPTPADLFSEDYLVDTLDGLTVDDQQAVLASLSFSKFLKHA KVRDWCAQAKIQPSMPALRMAYNYFLFSKVGEFIGSEDVCNFFVDRVFGGVRLLDVAS VYAACSQMNAHQRHHICCLVERATSSQSLNPVWDALRDGIISSSKFHWAVKQQNTSKK IFSPWPITNNHFVAGPLAFGLRCEEVVKTLLATLLHPDEANCLDYGFMQSPQNGIFGV SLDFAANVKTDTEGRLQFDPNCKVYEIKCRFKYTFAKMECDPIYAAYQRLYEAPGKLA LKDFFYSISKPAVEYVGLGKLPSESDYLVAYDQEWEACPRKKRKLTPLHNLIRECILH NSTTESDVYVLTDPQDTRGQISIKARFKANLFVNVRHSYFYQVLLQSSIVEEYIGLDS …	15.2679	6.25628e-53
NC_009333	58787..58972	ORF38	ORF38	HHV8GK18_gp42		myristylated tegument protein anchored in envelope; herpesvirus core gene UL11 family	1	ORF38	YP_001129391.1	4961435	MGFLLSICKRPSQPVDVDGEPLDVVVDYDPIRVSEKGMLLEQSQ SPYPALKKKKKNKEAIY	758.742	0
NC_009333	complement(59072..60274)	ORF39	ORF39	HHV8GK18_gp43		envelope glycoprotein gM; herpesvirus core gene UL10 family	1	ORF39	YP_001129392.1	4961437	MRASKSDRFLMSSWVKLLFVAVIMYICSAVVPMAATYEGLGFPC YFNNLVNYSALNLTVRNSAKHLTPTLFLEKPEMLVYIFWTFIVDGIAIVYYCLAAVAV YRAKHVHATTMMSMQSWIALLGSHSVLYVAILRMWSMQLFIHVLSYKHVLMAAFVYCI HFCISFAHIQSLITCNSAQWEIPLLEQHVPDNTMMESLLTRWKPVCVNLYLSTTALEM LLFSLSTMMAVGNSFYVLVSDAIFGAVNMFLALTVVWYINTEFFLVKFMRRQVGFYVG VFVGYLILLLPVIRYENAFVQANLHYIVAINISCIPILCILAIVIRVIRSDWGLCTPS AAYMPLATSAPTVDRTPTVHQKPPPLPAKTRARAKVKDISTPAPRTQYQSDHESDSEI …	43.6538	0
NC_009333	join(60407..61756,61884..62543)	ORF40	ORF40	HHV8GK18_gp44		subunit of helicase-primase complex; herpesvirus core gene UL8 family	1	ORF40	YP_001129393.1	4961438	MATSEETAAGYVIGVYFHSVHVHCRIIVWQVNFLPLDPNDGETE CYFVVDTLTKEAMERMPEIQECVPSITEHARDLAIWELALRLQNQTIVKAVRTASLPV VLIMTVGRIVNDVIPCPNVRTPRPLACAYLHCEATVTFEVPLTGPAASTGTWHSSIYR ECAISAIEICLKTSRGIYSCQSNEAPEAKREKRGLDISDVFVCLTYDIPIAGRVLSLL VPHAPAFHVLWINEDSKWNGAAVEFFRALHHKLFSERNGIPPLWLYVFPGAVEEGTAF APLLPAFPCIPLRYGSPTSLDRASVQWDLFEPHILTHFDGIKRTSLADTVFGYDSLAI SRECEDQYVWPTPVTDININLCTDSDTMAIVREPSGLVAVNLEALLRTDSVLSRVSSI …	15.7722	2.4154e-56
NC_009333	complement(62535..63371)	ORF42	ORF42	HHV8GK18_gp46		tegument protein; herpesvirus core gene UL7 family	1	ORF42	YP_001129394.1	4961440	MSLERALARLTGVPMSTHAPKTRESEEACPVYPHPVVPRLVLEV HRKNNALVGSNTPKMSVMGHLDIACLREHVKSRLSSPNFVGFTVVCLVEHEDMVTHID LHPHVFQERVCLLRPTSPGITELCCLLSMLENCRDMSPTFLRSIICRARKTHERTPGM DAAFVMHGIETLTATAAFVYELSVDDHFRATPLVMFKLHKAIGDASTPMGGLMKPIYL ESFKLESSGENEDDKQTCADPVNIFYCDTIFTKHLENNEVLKYLKMCTLFKPPIVSLF SK	104.412	0
NC_009333	complement(63235..65052)	ORF43	ORF43	HHV8GK18_gp45		portal protein; herpesvirus core gene UL6 family	1	ORF43	YP_001129395.1	4961497	MLRMNPGLGSSISVHPSELSISLFEILQGKYSYVRGQTLHCSLR NPGVFFRQLFIHLYKNALANCSYDHVLSDWRTYESSAKTRWPEKEAQWGSYRRSTFDS WAQTMRMTLDHLLLNAINRVLYAKTQLSYERYVDWVVTVGMVPVVKHTPDHKLVNSIQ EQLMKDCQRLASGEKTIGRILTSVTQEISNLVSSLSALYIPGYSEVSIDYDCVKNTFV GLYKQKRVHVEVITMPAILAGRVIFDSPIQRMYTSIMSCHRTAEHAKLCQLLNTAPTK ALVGSACNNVYKDIMTHLEQASQRTDPKRELLNLLMKLAENKTVSGVTDVVEDFVTDV SQNIVDKNKLFGTGQETTTQGLRRQVSNSVFKCLTNQINEQFDTITQLEKERELCMKR …	27.2701	4.79608e-164
NC_009333	64991..67357	ORF44	ORF44	HHV8GK18_gp47		helicase subunit of helicase-primase complex; herpesvirus core gene UL5 family	1	ORF44	YP_001129396.1	4961457	MDSSEGCTDMDEPSPGFILNMTSDAKVRSVVEQIDRLSNITTSP PEMGWYDLEFDPLEDEGPFLPFSAYVITGTAGAGKSTSVSALHQNLNCLITGATVVAA QNLSRALKSYCPTIYHAFGFKSRHINICQRKVPKVTQSSIEQLQRYELARYWPTVTDI IREFMRKKQKGQYSSLSQSAFRLLCRMGGANLWTSNIIVIDEAGTLSSHILTAVVFFY WFYNSWLDTPLYRNGAVPCIVCVGSPTQTDAFQSVFNHTQQRNEISACDNVLTFLLGK REVADYIRLDENWALFINNKRCTDPQFGHLLKTLEYNLDISPELMDYIDRFVVPKSKI LDPLEYAGWTRLFISHQEVKSFLATLHTCLSSNKDAVSTKLFTCPVVCEVFTEPFEEY …	13.6074	1.80837e-42
NC_009333	complement(67452..68675)	ORF45	ORF45	HHV8GK18_gp51	inhibition of IRF-7	virion phosphoprotein	1	ORF45	YP_001129397.1	4961474	MAMFVRTSSSTHDEERMLPIEGAPRRRPPVKFIFPPPPLSSLPG FGRPRGYAGPTVIDMSAPDDVFAEDTPSPPATPLDLQISPDQSSGESEYDEDEEDEDE EENDDVQEEDEPEGYPADFFQPLSHLRPRPLARRAHTPKPVAVVAGRVRSSTDTAESE ASMGWVSQDDGFSPAGLSPSDDEGVAILEPMAAYTGTGAYGLSPASRNSVPGTQSSPY SDPDEGPSWRPLRAAPTAIVDLTSDSDSDDSSNSPDVNNEAAFTDARHFSHQPPSSEE DGEDQGEVLSQRIGLMDVGQKRKRQSTASSGSEDVVRCQRQPNLSRKAVASVIIISSG SDTDEEPSSAVSVIVSPSSTKGHLPTQSPSTSAHSISSGSTTTAGSRCSDPTRILAST …	85.5582	0
NC_009333	complement(68736..69503)	ORF46	ORF46	HHV8GK18_gp50		uracil-DNA glycosylase; herpesvirus core gene UL2 family	1	ORF46	YP_001129398.1	4961472	MDAWLQQTVFRGTLSISQGVDDRDLLLAPKWISFLSLSSFLKQK LLSLLRQIRELRLTTTVYPPQDKLMWWSHCCDPEDIKVVILGQDPYHKGQATGLAFSV DPQCQVPPSLRSIFRELEASVPNFSTPSHGCLDSWARQGVLLLNTVLTVEKGRAGSHE GLGWDWFTSFIISSISSKLEHCVFLLWGRKAIDRTPLINAQKHLVLTAQHPSPLASLG GRHSRWPRFQGCNHFNLANDYLTRHRRETVDWGLLEQ	33.0013	3.89219e-239
NC_009333	complement(69511..70014)	ORF47	ORF47	HHV8GK18_gp49		envelope glycoprotein gL; herpesvirus core gene UL1 family	1	ORF47	YP_001129399.1	4961475	MGIFALFAVLWTTLLVTSHAYVALPCCAIQASAASTLPLFFAVH SIHFADPNHCNGVCIAKLRSKTGDITVETCVNGFNLRSFLVAVVRRLGSWASQENLRL LWYLQRSLTAYTVGFNATTADSSIHNVNIIIISVGKAMNRTGSVSGSQTRAKSSSRRA HAGQKGK	14.1069	1.72126e-45
NC_009333	complement(70272..71480)	ORF48	ORF48	HHV8GK18_gp48			1	ORF48	YP_001129400.1	4961458	MEVCIPIPGIGDENCESWRAQIVAFGTTSGFVKTERILRGLFPE RGHPGFLASLVVLKHTLASPGGLNTRLNLLPVLQMLKYVGQEMYMRAKCQATASDMTL IWDDCKDRFMLILEQACGCHQCMTVVEEITHCSAISAPPSSLSHGRHILSAGLINFAR RQVLLGGSVSFSEFSIPDLIQTPEQYPFVDVEFRRELSLISSCLNVCWLYHIFIEHIT SDVRRLESCMASVLEEYGGLSPTRPWAEAVTFLSQLPRPTRKPWKELSVSRINVEARL LDTLVMQLEKPVPVEIIKHALAILGTAGHVWNPEHQLACPDTRTCRERVSKGPCVGDG DVTLVHTARMDISNPSSVSPDGDVHYSGPPRTPAYGVVLECADDSDDSLDDFLENLSQ …	49.946	0
NC_009333	join(71695..71712,72671..74728)	ORF50	ORF50	HHV8GK18_gp52	induces switch from latent to lytic infection	transactivator; RTA	1	ORF50	YP_001129401.1	4961526	MAQDDKGKKLRRSCVESFVGLSDELKAQLYQCVLLINDAYETIY DPSDLNRVVEDVCIRIMKECSKLGALCGLFTDINMFNLFCFFRASRMRTKGAAGYNVP CAEASQGIIRILTERILFCTEKAFLTAACSGVSLPPAICKLLHEIYTEMKAKCLGAWR RLVCNRRPIMILTSSLLKLYNTYDTAGLLSEQSRALCLLVFQPVYLPRIMAPLEIMTK GQLAPENFYSITGSAEKRRPITTGKVTGLSYPGSGLMPESLILPILEPGLLPASMVDL SDVLAKPAVILSAPALSQFVISKPHPNMPHTVSIIPFNPSGTDPAFISTWQAASQNMV YNTSTAPLKPATGSSQTVSVKAVAQGAVITATTVPQAMPARGTGGELPVMSASTPARD …	27.8185	1.29488e-170
NC_009333	complement(71729..72637)	ORF49	ORF49	HHV8GK18_gp53			1	ORF49	YP_001129402.1	4961448	MTSRRPLKDHLFNHLFRYHYPSWDQILQELDTLSVATLNPDCHV PALNVEKTLYLAKTIQILVQHRQSEPYLVPAARANLAYSLQQLYKLGNDKIRGVINGM LPLVDAGCIGFERELIKGLPRVLTLQYPHTAPLESEPPTADCTEWCLSHFVGASGRLR SEVRDILTTHNGTCAPSFQWMASVVKKFFLVETVIYEDFQDTDFNVQLNLCFFWTAVV QMYQRCIYEQKLVHIISTSLTLLKSTARSFFAWYDLYRPNLGSAALVKYTEHLIRALT PDCSDVELGELCSHLHHCKHALFSIQ	29.2963	5.78516e-189
NC_009333	join(74949..75662,75744..75890)	K8	K8	HHV8GK18_gp54	switch from latent to lytic infection (putative)	bZIP transcription factor	1	K8	YP_001129403.1	4961462	MPRMKDIPTKSSPGTDNSEKDEAVIEEDLSLNGQPFFTDNTDGG ENEVSWTSSLLSTYVGCQPPAIPVCETVIDLTAPSQSGAPGDEHLPCSLNAETKFHIP DPSWTLSHTPPRGPHISQQLPTRRSKRRLHRKFEEERLCTKAKQGAGRPVPASVVKVG NITPHYGEELTRGDAVPAAPITPPYPRVQRPAQPTHVLFSPVFVSLKAEVCDQSHSPT RKQGRYGRVSSKAYTRQLQQALEEKDAQLCFLAARLEAHKEQIIFLRDMLMRMCQQPA SPTDAPLPPC	7.82892	2.46041e-15
NC_009333	join(76014..76437,76532..76794)	K8.1	K8.1	HHV8GK18_gp55		envelope glycoprotein; ORF51	1	K8.1	YP_001129404.1	4961469	MSSTQIRTEIPVALLILCLCLVACHANCPTYRSHLGFWQEGWSG QVYQDWLGRMNCSYENMTALEAVSLNGTRLAAGSPSSEYPNVSVSVEDTSASGSGEDA IDESGSGEEERPVTSHVTFMTQSVQATTELTDALISAFSGSYSSGEPSRTTRIRVSPV AENGRNSGASNRVPFSATTTTTRGRDAHYNAEIRTHLYILWAVGLLLGLVLILYLCVP RCRRKKPYIV	27.3435	6.45087e-165
NC_009333	complement(77432..77764)	ORF53	ORF53	HHV8GK18_gp57		envelope glycoprotein gN; herpesvirus core gene UL49A family	1	ORF53	YP_001129406.1	4961468	MTASTVALALFVASILGHCWVTANSTGVASSTERSSPSTAGLSA RPSPGPTSVTTPGFYDVACSADSFSPSLSSFSSVWALINALLVVVATFFYLVYLCFFK FVDEVVHA	79.5814	0
NC_009333	77835..78722	ORF54	ORF54	HHV8GK18_gp58		deoxyuridine triphosphatase; herpesvirus core gene UL50 family	1	ORF54	YP_001129407.1	4961459	MQSDSAPLPRVEYVFETSKFRMTSRANEARLRLTNECPILVRPH EPFIMPTGIHFTRTPSCAFILTGETDKDVFCHTGLIDGGYRGEIQVILLNKRKYPVTL YRGELNICLSAFNYVLPPLRDVSFLTPPMYANDAGFDVMVMHSMVIPPTTDQPFMIYL GVETPGPPEPHVALALGRSGLASRGIVIDVSEWGPRGLQLKFYNYSGQPWLAQPGSRI CQIVFVERRHILKGFKKCLRHRKLAPGVRFREARVHFREDTNSVRKHTHEDNPVHEPN VATASADIRGTKGLGSSGF	6.76696	6.57569e-12
NC_009333	79535..82066	ORF56	ORF56	HHV8GK18_gp60		primase subunit of helicase-primase complex; herpesvirus core gene UL52 family	1	ORF56	YP_001129409.1	4961445	METTYRREALTVRVIFCTSGDSAETIADVLTGAPTSASFFSVLH DLFYSQILAPRVTLKLCLPARRPGNGTRCSPVLVLRTDASVASGFLGGRPLEASDIKY MLLSDQTAGLFKPLLEIIGGARAPPNQDACTFQSQVAWLRTKFVTALRKLYKMTPSPY WMLSAFGAQEAQFVLTSSFYFFEHTVVCTTETVSHLSRLFSPQQGQTLVSVTSHEELG QLYGTSPFRRRVPAFVAYVKEKLARDSLETEAIDRTIDQIRGKLMLSNQDLVHFIYIS FYQCLNKRAFLRYSRQTSSSSALRELGEDPQLCGALHGEFRDHVQSYYHKKTYLSTYI DIRYVGGVLPDGYFGGSLVGERCVYWCGQSKDTASLLATISQQVPHLRLQNEFAGMLD …	41.9695	0
NC_009333	join(82169..82217,82326..83644)	ORF57	ORF57	HHV8GK18_gp61		post-transcriptional regulator; herpesvirus core gene UL54 family	1	ORF57	YP_001129410.1	4961525	MVQAMIDMDIMKGILEDSVSSSEFDESRDDETDAPTLEDEQLSE PAEPPADERIRGTQSAQGIPPPLGRIPKKSQGRSQLRSEIQFCSPLSRPRSPSPVNRY GKKIKFGTAGQNTRPPPEKRPRRRPRDRLQYGRTTRGGQCRAAPKRATRRPQVNCQRQ DDDVRQGVSDAVKKLRLPASMIIDGESPRFDDSIIPRHHGACFNVFIPAPPSHVPEVF TDRDITALIRAGGKDDELINKKISAKKIDHLHRQMLSFVTSRHNQAYWVSCRRETAAA GGLQTLGAFVEEQMTWAQTVVRHGGWFDEKDIDIILDTAIFVCNAFVTRFRLLHLSCV FDKQSELALIKQVAYLVAMGNRLVEACNLLGEVKLNFRGGLLLAFVLTIPGMQSRRSI …	12.0888	6.04892e-34
NC_009333	complement(join(89700..90945,91042..91496))	vIRF-3	vIRF-3	HHV8GK18_gp64		interferon regulatory factor	1	vIRF-3	YP_001129413.1	4961493	MAGRRLTWISEFIVGALDSDKYPLVKWLDRSTGTFLAPAARNDV IPLDSLQFFIDFKRECLSKGLHPRDLLGSPITAFGKICTTSRRLRRLPGEEYEVVQGI NCRRWRLLCAEVKECWWCVHARTHLHSGSSLWEILYQHSVRLEKHRRRPRPFVGENSD SSEEDHPAFCDVPVTQTGAESEDSGDEGPSTRHSASGVQPVDDANADSPGSGDEGPST RHSDSQPPPADETTVHTDNVEDDLTLLDKESACALMYHVGQEMDMLMRAMCDEDLFDL LGIPEDVIATSQPGGDTDASGVVTEGSIAASAVGAGVEDVYLAGALEAQNVAGEYVLE ISDEEVDDGAGLPPASRRRPVVGEFLWDDGPRRHERPTTRRIRHRKLRSAYYRVARPP …	51.3434	0
NC_009333	complement(join(92066..93620,93742..94229))	vIRF-2	vIRF-2	HHV8GK18_gp65		interferon regulatory factor	1	vIRF-2	YP_001129414.1	4961491	MPRYTESEWLTDFIIDALDSGRFWGVGWLDEQKRIFTVPGRNRR ERMPEGFDDFYEAFLEERRRHGLPEIPETETGLGCFGRLLRTANRARQERPFTIYKGK MKLNRWIMTPRPYKGCEGCLVYLTQEPAMKNMLKALFGIYPHDDKHREKALRRSLRKK AQREAARKQAAAVATPTTSSAAEVSSRSQSEDTESSDSENELWVGAQGFVGRDMHSLF FEEPEPSGFGSSGQSSSLLAPDSPRPSTSQVQGPLHVHTPTDLCLPTGGLPSPVIFPH ETQGLLAPPAGQSQTPFSPEGPVPSHVSGLDDCLPMVDHIEGCLLDLLSDVGQELPDL GDLGELLCETASPQGPMQSEGGEEGSTESVSVLPATHPLESSAPGASVMGSGQELPDL …	51.2258	0
NC_009333	complement(94577..95650)	ORF58	ORF58	HHV8GK18_gp68		multiple transmembrane protein; herpesvirus core gene UL43 family	1	ORF58	YP_001129415.1	4961480	MCRLDSERALSLFSYLSGTLAATPFLWCFIFKALYSFTLFTTEI TAVFFWSLPVTHLALICMCLCPAAQKQLDRRLEWICASAVFAAVVCAAFSGFTFSRVP FIPGLCVLNCLLLLPYPLATATAVYQAPPIVHRYYELGFCGAFMVYYLLLFKKVFVSG VFWLPFIVFLVGGLLAFRHLEQHVYIRAGMQRRRAIFIMPGKYITYSVFQAWAYCRRE VVVFVTLLLATLISTASIGLLTPVLIGLDKYMTLFYVGLLSCVGVSVASRRALFVLLP LAAVLLTLVHILGSGPDMLLVRSCLCCLFLVSMLAAMGVEIQLIRRKLHRALNAPQMV LALCTVGNLCISCLLSVINKVVG	9.31132	6.31254e-21
NC_009333	complement(96976..97893)	ORF60	ORF60	HHV8GK18_gp67		ribonucleotide reductase small subunit; herpesvirus core gene UL40 family	1	ORF60	YP_001129417.1	4961455	MDSVDRFLYTSDHDGFLALTRETWQNRWFPSQIPLHLDVSHVHQ LSDADKDFYRFLFTFLGMAERLVNFNIEDLVTNFNSHDVAHYYAEQVAMENIHGVVYA NILKIFFNNSRGELLAYAAKIILDPALCEKLEWLHSRVRKATTKAQKILMFLIVEGIY FISSFYSISLCRVRGIMPGVCLANDYISRDELLHTKAASMLYNTMVEIQEKPSHAEVQ ALFREAVNIEIRFIQAKAAGVTLVNVVDIRRFLEATADRILRDIFVPPIFGTPPPEAC PLSYTGSFKAVNFFERDNSDYTTCVTDDL	52.0959	0
NC_009333	complement(97922..100300)	ORF61	ORF61	HHV8GK18_gp66		ribonucleotide reductase large subunit; herpesvirus core gene UL39 family	1	ORF61	YP_001129418.1	4961490	MSVRTFCQVHLGAVPPERRGSQVSAGQLSDFDMCAQSLIDFLKV RVGWDVRANAMAGRLWHQIMEARCPATLKQYLGIFRGVLGHRVESFIQKNIDALEDML CAYRRSKAYEDTLNCGYLSAVRLYDTYVLRTMGTEPVYESVAQMFMRVSVFVACQCLE HECLYWLARDLIEDAKSVSEMAIVEYVFGYLAAQHVCCATPILRSAGVEGGQLASCFI LQPSMMNEPGTLDALYHDMSPLLASKSGVGLDVTSFSHQKNIASCLKLVDAQVHYFND NNIRPVGASAYMELWHSQICDFLNAKLPENPDRCHSLFQGVCIPTLFFRMYEKDPSKL WYLFDPATAPNLIKLYGAAFDNEYERLVRAGKYVSCMPLKSMMFTLIHTIIKTGSPYV …	18.7773	5.79541e-79
NC_009333	101314..104100	ORF63	ORF63	HHV8GK18_gp71		tegument protein; herpesvirus core gene UL37 family	1	ORF63	YP_001129420.1	4961466	MDGTDALEKLTKGLSGGGGSLHQTKLLMEFQLRGLPVPALLNSS TTEQFLNTVAQLPTDLSKFIRDYRVFALVRAAYFLEPPSSIDPLEAARALGRLVDILS SQPPQNTAPAQPPTSDDTLNNCTLLKLLAHYADQIAGFKTPALPPVPPGIIGLFTCVE QMYHACFQKYWAAALPPMWILTYDPPTSPLQDWLIVAYGNKEGLLLPSGIPSEEVLAK TLVTEHHELFVSRSNSTETAVTMPVSKERALAIYRVFAKGEVVAENTPILAFTDVELS TLKPHYLFIYDFIIEALCKSYTYSCTQARLESFLSRGIDFMTDLGQYLDTATSGKQQL THSQIKEIKYRLLSCGLSASACDVFRTVIMTLPYRPTPNLANLSTFMGMVHQLTMFGH …	33.6215	4.06426e-248
NC_009333	complement(112576..113865)	ORF66	ORF66	HHV8GK18_gp75		related to HHV-5 UL49	1	ORF66	YP_001129423.1	4961523	MALDQRWDRFLVSWFGLDEAQLTAHRVFEGENGVPVEEYVAFVI FGERGFQGNMPSWARHLLDRPSLAQAIAVLRAGSDTVAKQAQICAAQQLLGAHVWVVV TLSRAQAADHARAIPRHVWAKYLSLPFSKACAQLCKLLALCSRFPLVTCCSKPPPSLP WLRKKWHGPLPRRPLLEVPSPTRRGVAATEDGNGLGIGAADTGLREALERVAPTVPCG NPFDAMLGSLCFLSLIKSRHVVLPACEQEGPGLVRNLGRRLLAYNVLSPCVSIPVICS RVARAALAKRARCARAVVCMECGHCLNFGRGKFHTVNFPPTNVFFSRDRKEKQFTICA TTGRIYCSYCGSEHMRVYPLCDITGRGTLARVVIRAVLANNAALAIRDLDQTVSFVVP …	14.2357	2.74882e-46
NC_009333	115108..116511	HHV8GK18_gp77		HHV8GK18_gp77	nuclear localization of capsids and DNA packaging	herpesvirus core gene UL32 family	1	ORF68	YP_001129426.1	4961470	MFVPWQLGTITRHRDELQKLLAASLLPEHPEESLGNPIMTQIHQ SLQPSSPCRVCQLLFSLVRDSSTPMGFFEDYACLCFFCLYAPHCWTSTMAAAADLCEI MHLHFPEEEATYGLFGPGRLMGIDLQLHFFVQKCFKTTAAEKILGISNLQFLKSEFIR GMLTGTITCNFCFKTSWPRTDKEEATGPTPCCQITDTTTAPASGIPELARATFCGASR PTKPSLLPALIDIWSTSSELLDEPRPRLIASDMSELKSVVASHDPFFSPPLQADTSQG PCLMHPTLGLRYKNGTASVCLLCECLAAHPEAPKALQTLQCEVMGHIENNVKLVDRIA FVLDNPFAMPYVSDPLLRELIRGCTPQEIHKHLFCDPLCALNAKVVSEDVLFRLPREQ …	25.5561	2.35057e-144
NC_009333	complement(122393..122959)	HHV8GK18_gp80		HHV8GK18_gp80		FLIP-like inhibitor of apoptosis; contains two death effector domains; ORF71; vFLIP	1	K13	YP_001129429.1	4961494	MATYEVLCEVARKLGTDDREVVLFLLNVFIPQPTLAQLIGALRA LKEEGRLTFPLLAECLFRAGRRDLLRDLLHLDPRFLERHLAGTMSYFSPYQLTVLHVD GELCARDIRSLIFLSKDTIGSRSTPQTFLHWVYCMENLDLLGPTDVDALMSMLRSLSR VDLQRQVQTLMGLHLSGPSHSQHYRHTP	45.9011	0
NC_009333	complement(123042..123815)	HHV8GK18_gp82		HHV8GK18_gp82		cyclin D-like protein; contains two cyclin-like domains; vCyclin	1	ORF72	YP_001129430.1	4961471	MATANNPPSGLLDPTLCEDRIFYNILEIEPRFLTSDSVFGTFQQ SLTSHMRKLLGTWMFSVCQEYNLEPNVVALALNLLDRLLLIKQVSKEHFQKTGSACLL VASKLRSLTPISTSSLCYAAADSFSRQELIDQEKELLEKLAWRTEAVLATDVTSFLLL KLLGGSQHLDFWHHEVNTLITKALVDPKTGSLPASIISAAGCALLVPANVIPQDTHSG GVVPQLASILGCDVSVLQAAVEQILTSVSDFDLRILDSY	56.6062	0
NC_009333	complement(124057..127446)	HHV8GK18_gp81		HHV8GK18_gp81	maintenance of episomal genome	latent nuclear antigen; component of latency-associated nuclear antigen; LANA; LNA; ORF73	1	LANA	YP_001129431.1	4961527	MAPPGMRLRSGRSTGAPLTRGSCRKRNRSPERCDLGDDLHLQPR RKHVADSVDGRECGPHTLPIPGSPTVFTSGLPAFVSSPTLPVAPIPSPAPATPLPPPA LLPPVTTSSSPIPPSHPVSPGTTDTHSPSPALPPTQSPESSQRPPLSSPTGRPDSSTP MRPPPSQQTTPPHSPTTPPPEPPSKSSPDSLAPSTLRSLRKRRLSSPQGPSTLNPICQ SPPVSPPRCDFANRSVYPPWATESPIYVGSSSDGDTPPRQPPTSPISIGSSSPSEGSW GDDTAMLVLLAEIAEEASKNEKECSENNQAGEDNGDNEISKESQVDKDDNDNKDDEEE QETDEEDEEDDEEDDEEDDEEDDEEDDEEDDEEDDEEEDEEEDEEEDEEEDEEEEEDE …	161.663	0
NC_009333	129520..130548	HHV8GK18_gp84		HHV8GK18_gp84		G protein-coupled receptor; similar to IL-8 receptor; transforming protein; vGPCR	1	ORF74	YP_001129433.1	4961460	MAAEDFLTIFLDDDESWNETLNMSGYDYSGNFSLEVSVCEMTTV VPYTWNVGILSLIFLINVLGNGLVTYIFCKHRSRAGAIDILLLGICLNSLCLSISLLA EVLMFLFPNIISTGLCRLEIFFYYLYVYLDIFSVVCVSLVRYLLVAYSTRSWPKKQSL GWVLTSAALLIALVLSGDACRHRSRVVDPVSKQAMCYENAGNMTADWRLHVRTVSVTA GFLLPLALLILFYALTWCVVRRTKLQARRKVRGVIVAVVLLFFVFCFPYHVLNLLDTL LRRRWIRDSCYTRGLINVGLAVTSLLQALYSAVVPLIYSCLGSLFRQRMYGLFQSLRQ SFMSGATT	109.989	0
NC_009333	complement(130699..134589)	HHV8GK18_gp86		HHV8GK18_gp86		tegument protein; related to formylglycinamide ribotide amidotransferase (FGARAT)	1	ORF75	YP_001129434.1	4961476	MAYDVTGLWLESDLTADEEAFVSFYTSRTGTLTLVPGGTGGYYL LWITFRRPPTSREERERRDVEIQTVLAVLSPLLGYPHVIRRSPPRGSERVVSFGYGPN INHRPTTLSTELGVLLRELGLQEWARVEVGRHLVSKITQTLLEPHPPQFIRAFTQNTD LVPYEGLEVPEGPQPVARPHIEDDVIMQAVMISLGADLLPLAVQASTGDNYNVARYFV IPGRCTMERWPWNCARQAFGIHGAYTHVHSSVQRGIRGLGNLLFHSTLFPGGQTQGAL TGLYATEPALGPRAHSRFRRIFAKGVQQAEMLQGAGVPTLGGFLKTVRTIATTPGNAL AVCSISTTTSKECISLRRMIPQQTVVCLGRFEPTDGPDTYPNLYRDSSDNAVRILETL …	1.70505	0.0440929
NC_009333	complement(join(134824..135287,135373..135474,135557..135664,135747..135899,135977..136066,136155..136397,136481..136573,136683..136899))	K15	K15	HHV8GK18_gp85		signal transducing membrane protein; LAMP	1	K15	YP_001129435.1	4961473	MKTLIFFWNLWLWALLVCFWCITLVCVTTNSIDTMASLLVMCIL FVSAINKYTQAISSNNPKWPSSWHLGIIACIVLKLWNLSTTNSVTYACLITTAILSLV TAFLTLIKHCTACKLQLEHGILFTSTFAVLMTNMLVHMSNTWQSSWIFFPISFTLSLP FLYAFATVKTGNIKLVSSVSFICAGLVMGYPVSCCKTHTCTATAAGLSLSSIYLGFTG IISTLHKSWAPPKRGILTFLLLQGGVLTTQTLTTELLAITSTTGNIKGHEILLLVCLI FLWCLYVWQSFNKASLVTGMLHLIAAWSHTGGCVQLVMLLPSGLTRGILTMIICISTL FSTLQGLLVFYLYKEKKVVAVNSYRQRRRRIYTRDQNLHHNDNHLGNNVISPPPLPPF …	282.849	0
