# Supplementary material for: Epigenetic Reprogramming of Kaposi’s Sarcoma-Associated Herpesvirus during Hypoxic Reactivation
Source: Cancers (Basel). 2022 Nov 2;14(21):5396. doi: 10.3390/cancers14215396 (PMC9654037; doi:10.3390/cancers14215396)
Supplement: Supplementary file 1 [file cancers-14-05396-s001.zip › LANA Hypoxia.csv]

Chromosome	Region	Name	Center of peak	Length	Peak shape score	P-value
NC_009333	260..282	Peak	269	23	1.0498700603	0.1468889292
NC_009333	683..706	Peak	696	24	0.5524556468	0.2903181071
NC_009333	1071..1088	Peak	1081	18	0.7347569525	0.2312437641
NC_009333	1442..1598	Peak	1491	157	1.3795491132	0.0838627573
NC_009333	1845..1970	Peak	1879	126	0.574306139	0.2828803278
NC_009333	2249..2402	Peak	2395	154	1.3807378777	0.0836797852
NC_009333	2762..2943	Peak	2864	182	0.8952399502	0.1853294165
NC_009333	3042..3195	Peak	3171	154	0.319996377	0.3744855385
NC_009333	3466..3529	Peak	3499	64	0.7722594352	0.2199803929
NC_009333	4096..4111	Peak	4110	16	0.0939959266	0.4625561963
NC_009333	4356..4369	Peak	4357	14	0.1829988931	0.4273994436
NC_009333	4618..4698	Peak	4690	81	1.5188235636	0.0644034565
NC_009333	4992..5090	Peak	5042	99	0.315042563	0.3763646687
NC_009333	5260..5324	Peak	5318	65	0.8973636018	0.1847624641
NC_009333	5619..5664	Peak	5634	46	0.3354539903	0.3686413232
NC_009333	6014..6220	Peak	6153	207	0.7989464693	0.2121607261
NC_009333	6921..6988	Peak	6953	68	0.3793728425	0.3522055072
NC_009333	7352..7399	Peak	7386	48	0.5914238266	0.2771182399
NC_009333	7916..8043	Peak	7960	128	0.5854607505	0.2791189753
NC_009333	8229..8277	Peak	8263	49	0.5592254564	0.2880039309
NC_009333	8443..8518	Peak	8482	76	0.4633498816	0.3215567983
NC_009333	9039..9116	Peak	9108	78	0.3041194404	0.3805184483
NC_009333	9333..9454	Peak	9414	122	0.2757991796	0.3913511569
NC_009333	10054..10149	Peak	10109	96	0.1400264239	0.4443195564
NC_009333	10760..10945	Peak	10904	186	0.786117751	0.2158992529
NC_009333	11074..11174	Peak	11087	101	0.6869253154	0.2460648966
NC_009333	11596..11597	Peak	11597	2	0.06457784	0.4742550645
NC_009333	11838..11855	Peak	11838	18	0.120733553	0.451951041
NC_009333	12249..12373	Peak	12292	125	0.5394029013	0.2948044398
NC_009333	12682..12748	Peak	12695	67	0.5274645908	0.2989354998
NC_009333	13195..13204	Peak	13200	10	0.2241063209	0.4113372871
NC_009333	13346..13387	Peak	13385	42	0.2612542568	0.3969482198
NC_009333	13554..13691	Peak	13598	138	0.3216183665	0.373870914
NC_009333	14421..14573	Peak	14496	153	0.610237744	0.2708521652
NC_009333	14747..14770	Peak	14747	24	0.0939959266	0.4625561963
NC_009333	14986..15075	Peak	15034	90	0.187162857	0.425766473
NC_009333	15277..15454	Peak	15341	178	0.5057771209	0.3065065608
NC_009333	15736..15875	Peak	15779	140	0.270301978	0.3934639719
NC_009333	16011..16090	Peak	16062	80	0.1331090769	0.4470535584
NC_009333	16208..16267	Peak	16246	60	0.2080575304	0.4175920237
NC_009333	16711..16875	Peak	16732	165	0.391882914	0.347572364
NC_009333	17028..17080	Peak	17049	53	0.4113765869	0.3403982096
NC_009333	17212..17361	Peak	17273	150	0.826961495	0.2041294431
NC_009333	17688..17724	Peak	17707	37	0.2735453789	0.3922170073
NC_009333	18419..18486	Peak	18447	68	0.2108982106	0.4164833502
NC_009333	19294..19323	Peak	19302	30	0.4665144775	0.3204236436
NC_009333	19764..19783	Peak	19771	20	0.2977419717	0.3829500533
NC_009333	20125..20275	Peak	20204	151	0.4112406977	0.3404480245
NC_009333	20510..20555	Peak	20537	46	0.3026378928	0.3810829168
NC_009333	20801..20879	Peak	20869	79	0.304958041	0.3801990547
NC_009333	21150..21217	Peak	21209	68	0.8973069636	0.1847775708
NC_009333	21941..22081	Peak	21972	141	0.3461306854	0.3646222517
NC_009333	22305..22369	Peak	22349	65	0.2437748419	0.4037026029
NC_009333	22557..22650	Peak	22641	94	0.7087127682	0.2392513699
NC_009333	23046..23164	Peak	23149	119	0.257196718	0.3985134587
NC_009333	23527..23671	Peak	23535	145	1.870800907	0.0306863409
NC_009333	23954..23972	Peak	23959	19	0.4747822075	0.3174711081
NC_009333	24728..24892	Peak	24821	165	0.6151293812	0.26923464
NC_009333	25253..25373	Peak	25331	121	1.0827182375	0.1394667532
NC_009333	25788..25817	Peak	25799	30	2.4044824973	8.098E-3
NC_009333	26289..26339	Peak	26299	51	0.662309792	0.2538863513
NC_009333	26585..26749	Peak	26732	165	0.4748543769	0.317445386
NC_009333	26939..27129	Peak	27079	191	1.1140025212	0.1326390525
NC_009333	27299..27388	Peak	27347	90	0.2195147699	0.4131245379
NC_009333	27728..27843	Peak	27757	116	0.1792912592	0.4288545049
NC_009333	28155..28336	Peak	28192	182	1.0238665184	0.1529491632
NC_009333	28378..28547	Peak	28449	170	0.6145981393	0.2694100718
NC_009333	28653..28753	Peak	28661	101	0.6718947683	0.2508253456
NC_009333	29336..29395	Peak	29377	60	1.0275484806	0.1520811346
NC_009333	29733..29747	Peak	29741	15	0.2755714435	0.3914386227
NC_009333	30035..30212	Peak	30068	178	0.3338334983	0.3692526021
NC_009333	30477..30575	Peak	30554	99	0.2047710635	0.418875498
NC_009333	30883..30898	Peak	30890	16	0.7622327438	0.2229605533
NC_009333	31257..31434	Peak	31324	178	0.5591616865	0.2880256892
NC_009333	31659..31728	Peak	31675	70	0.281215705	0.3892724798
NC_009333	31919..31959	Peak	31952	41	0.2101036601	0.4167933844
NC_009333	32130..32367	Peak	32288	238	0.8875027141	0.1874041528
NC_009333	32566..32726	Peak	32672	161	0.5287484852	0.298489969
NC_009333	33041..33062	Peak	33056	22	0.176046449	0.4301287256
NC_009333	33339..33478	Peak	33409	140	0.3417517614	0.3662688574
NC_009333	33720..33734	Peak	33727	15	0.0685447108	0.4726760148
NC_009333	34079..34260	Peak	34223	182	0.4119665715	0.3401819626
NC_009333	34323..34507	Peak	34463	185	0.3070340791	0.3794087164
NC_009333	34955..34987	Peak	34974	33	0.2469943921	0.4024562821
NC_009333	35407..35419	Peak	35414	13	0.0517249385	0.4793739329
NC_009333	35649..35671	Peak	35658	23	0.1479633178	0.4411858588
NC_009333	36149..36315	Peak	36246	167	0.759104022	0.2238951667
NC_009333	36940..37042	Peak	37003	103	0.526759376	0.2991803485
NC_009333	37411..37583	Peak	37490	173	0.8436437878	0.1994342439
NC_009333	38003..38054	Peak	38017	52	0.3355804529	0.3685936332
NC_009333	38373..38483	Peak	38446	111	0.4377178063	0.33079543
NC_009333	38729..38758	Peak	38739	30	0.1969101835	0.4219489122
NC_009333	38949..39097	Peak	39036	149	0.4226064492	0.3362912103
NC_009333	39325..39483	Peak	39415	159	0.7943001943	0.2135103455
NC_009333	39758..39942	Peak	39871	185	0.267389729	0.3945845534
NC_009333	40329..40381	Peak	40347	53	0.2164491852	0.4143188153
NC_009333	40752..40965	Peak	40910	214	0.2313597981	0.4085176472
NC_009333	41581..41667	Peak	41625	87	0.5289596346	0.2984167259
NC_009333	42206..42386	Peak	42231	181	0.5620188356	0.287051593
NC_009333	42964..43104	Peak	43063	141	0.5412004309	0.2941847202
NC_009333	43461..43477	Peak	43461	17	0.0692757473	0.4723850651
NC_009333	44067..44125	Peak	44101	59	0.5939907898	0.2762591366
NC_009333	44517..44537	Peak	44522	21	0.1029403874	0.4590051417
NC_009333	44763..44794	Peak	44773	32	0.1763459381	0.4300110871
NC_009333	45156..45228	Peak	45188	73	0.1400264239	0.4443195564
NC_009333	45525..45552	Peak	45535	28	0.1165597264	0.4536044769
NC_009333	45728..45742	Peak	45735	15	0.0685447108	0.4726760148
NC_009333	46164..46172	Peak	46170	9	0.0719359274	0.4713264491
NC_009333	46443..46538	Peak	46498	96	0.1400264239	0.4443195564
NC_009333	46916..46989	Peak	46963	74	0.3629611789	0.3583169422
NC_009333	47349..47477	Peak	47406	129	0.2455767181	0.4030049568
NC_009333	47762..47905	Peak	47795	144	0.2371626948	0.406265288
NC_009333	48160..48328	Peak	48235	169	1.1203292285	0.1312867455
NC_009333	48678..48790	Peak	48774	113	0.2055929485	0.4185544431
NC_009333	49016..49033	Peak	49024	18	0.3014385055	0.3815400679
NC_009333	49698..49837	Peak	49735	140	0.4629198872	0.321710896
NC_009333	50213..50317	Peak	50264	105	0.4306746621	0.3333524724
NC_009333	50626..50847	Peak	50782	222	0.5565318317	0.28892367
NC_009333	51333..51432	Peak	51412	100	0.4953090566	0.3101909895
NC_009333	52266..52369	Peak	52278	104	0.3280040347	0.371454306
NC_009333	52502..52672	Peak	52639	171	0.3986443063	0.3450776552
NC_009333	53138..53279	Peak	53189	142	0.4113421642	0.3404108281
NC_009333	53554..53627	Peak	53586	74	0.4847677426	0.3139205535
NC_009333	53962..53994	Peak	53968	33	0.412764033	0.3398897527
NC_009333	54158..54194	Peak	54186	37	0.3797179626	0.3520773925
NC_009333	54831..54847	Peak	54840	17	0.1775536785	0.4295367528
NC_009333	55046..55176	Peak	55108	131	0.3184441267	0.3750740353
NC_009333	55294..55383	Peak	55342	90	0.187162857	0.425766473
NC_009333	55585..55745	Peak	55644	161	0.7737387105	0.2195426616
NC_009333	56051..56063	Peak	56057	13	0.2999143418	0.3821212472
NC_009333	56383..56472	Peak	56431	90	0.187162857	0.425766473
NC_009333	56892..56946	Peak	56921	55	0.3882941932	0.348899167
NC_009333	57166..57331	Peak	57260	166	0.6104544523	0.2707804034
NC_009333	57647..57666	Peak	57654	20	0.1539387261	0.4388290245
NC_009333	57907..57940	Peak	57939	34	0.2491774649	0.4016117551
NC_009333	58252..58414	Peak	58291	163	0.6334491064	0.2632202029
NC_009333	58845..58923	Peak	58914	79	2.0680565013	0.0193173552
NC_009333	59267..59377	Peak	59336	111	0.4989814688	0.3088962195
NC_009333	59506..59588	Peak	59550	83	0.5031795078	0.3074190355
NC_009333	60395..60497	Peak	60453	103	0.2910555465	0.3855044188
NC_009333	60666..60761	Peak	60721	96	0.1400264239	0.4443195564
NC_009333	61121..61135	Peak	61128	15	0.0685447108	0.4726760148
NC_009333	61388..61570	Peak	61461	183	0.5498319802	0.2912173108
NC_009333	61570..61709	Peak	61676	140	0.7947536421	0.213378411
NC_009333	62489..62523	Peak	62512	35	0.7101938306	0.2387919731
NC_009333	62657..62721	Peak	62682	65	0.7978700379	0.2124729561
NC_009333	62969..63064	Peak	63024	96	0.1400264239	0.4443195564
NC_009333	63148..63243	Peak	63203	96	0.1400264239	0.4443195564
NC_009333	63390..63545	Peak	63508	156	0.5520722769	0.2904494175
NC_009333	63873..63905	Peak	63889	33	0.6520071693	0.2571982737
NC_009333	64596..64622	Peak	64612	27	0.2348969934	0.4071443416
NC_009333	64963..65061	Peak	65056	99	0.2945204301	0.3841801272
NC_009333	65442..65590	Peak	65507	149	0.6140676679	0.2695853063
NC_009333	65769..65837	Peak	65819	69	0.296160388	0.3835537991
NC_009333	65886..66074	Peak	66034	189	0.2907203579	0.3856326002
NC_009333	66396..66449	Peak	66447	54	0.1611516345	0.4359869866
NC_009333	66589..66670	Peak	66630	82	0.1400264239	0.4443195564
NC_009333	66808..67010	Peak	66966	203	0.3081390464	0.3789882655
NC_009333	67398..67553	Peak	67468	156	0.5576302128	0.2885484605
NC_009333	67756..67888	Peak	67844	133	0.2421180446	0.4043443483
NC_009333	68393..68414	Peak	68402	22	1.0356513626	0.1501824103
NC_009333	68599..68727	Peak	68626	129	0.8275671704	0.2039578335
NC_009333	68999..69020	Peak	69009	22	0.1870154168	0.4258242727
NC_009333	69528..69549	Peak	69535	22	0.5053253736	0.3066651621
NC_009333	69759..69890	Peak	69828	132	0.187162857	0.425766473
NC_009333	70507..70614	Peak	70548	108	0.1958814927	0.4223514617
NC_009333	71055..71214	Peak	71182	160	0.5920791202	0.276898804
NC_009333	71388..71485	Peak	71437	98	0.2392082195	0.4054720647
NC_009333	71646..71710	Peak	71650	65	0.3246139153	0.3727366471
NC_009333	72008..72033	Peak	72017	26	0.4754138568	0.3172460099
NC_009333	72361..72403	Peak	72371	43	0.1992726301	0.4210247439
NC_009333	72545..72742	Peak	72607	198	0.5289234886	0.2984292636
NC_009333	72920..72937	Peak	72929	18	0.321071901	0.3740779518
NC_009333	73605..73620	Peak	73616	16	0.1890575294	0.4250238639
NC_009333	73823..73976	Peak	73936	154	0.2782894402	0.3903950908
NC_009333	74262..74340	Peak	74306	79	0.6401440065	0.2610394908
NC_009333	74721..74863	Peak	74818	143	1.1580905818	0.1234135365
NC_009333	75305..75386	Peak	75351	82	0.1089068944	0.4566381691
NC_009333	75624..75646	Peak	75644	23	0.2943730346	0.3842364349
NC_009333	75796..75869	Peak	75828	74	0.2559413685	0.3989980554
NC_009333	76250..76412	Peak	76360	163	0.5496162859	0.2912912931
NC_009333	76704..76815	Peak	76802	112	0.7683813914	0.2211303162
NC_009333	77005..77094	Peak	77053	90	0.187162857	0.425766473
NC_009333	77274..77362	Peak	77309	89	0.3039872707	0.3805687945
NC_009333	77486..77636	Peak	77592	151	0.5714288881	0.2838544758
NC_009333	77783..77964	Peak	77890	182	0.4173314502	0.3382179938
NC_009333	78211..78387	Peak	78234	177	0.2865842713	0.3872153296
NC_009333	78387..78560	Peak	78456	174	0.2038857229	0.4192214011
NC_009333	78815..78926	Peak	78886	112	0.4713355369	0.318700571
NC_009333	79270..79410	Peak	79406	141	0.434828736	0.3318433725
NC_009333	80094..80187	Peak	80137	94	0.7757400245	0.2189512512
NC_009333	80487..80576	Peak	80535	90	0.187162857	0.425766473
NC_009333	80710..80859	Peak	80819	150	0.2693009574	0.3938490478
NC_009333	81149..81211	Peak	81184	63	0.390229788	0.3481833183
NC_009333	81355..81503	Peak	81455	149	0.4115037313	0.3403516029
NC_009333	81602..81743	Peak	81664	142	0.8057028364	0.2102071068
NC_009333	81809..81951	Peak	81912	143	1.4147999764	0.0785635755
NC_009333	82252..82297	Peak	82265	46	0.4445345087	0.3283280925
NC_009333	82874..82898	Peak	82874	25	0.0939959266	0.4625561963
NC_009333	83101..83116	Peak	83113	16	0.2383572981	0.4058019921
NC_009333	83233..83356	Peak	83305	124	0.3837216788	0.3505923715
NC_009333	83501..83624	Peak	83602	124	0.3916272594	0.3476668218
NC_009333	83810..83875	Peak	83833	66	0.2845113427	0.3880092714
NC_009333	84160..84211	Peak	84183	52	0.3710321213	0.3553068036
NC_009333	84729..84766	Peak	84750	38	0.1792425466	0.4288736286
NC_009333	84995..85163	Peak	85047	169	0.3052318367	0.3800947932
NC_009333	85671..85695	Peak	85682	25	0.6324964651	0.2635312588
NC_009333	85958..86036	Peak	86007	79	0.2514121712	0.4007477293
NC_009333	86253..86328	Peak	86326	76	0.2673741671	0.3945905436
NC_009333	86547..86561	Peak	86554	15	0.0685447108	0.4726760148
NC_009333	86954..87013	Peak	86977	60	0.1286843465	0.448803711
NC_009333	87563..87577	Peak	87570	15	0.0685447108	0.4726760148
NC_009333	88485..88572	Peak	88533	88	0.5033585965	0.3073560879
NC_009333	88887..89065	Peak	88928	179	0.552672037	0.2902440022
NC_009333	89537..89553	Peak	89548	17	0.322577958	0.3735074445
NC_009333	89664..89768	Peak	89720	105	0.4320024221	0.3328698264
NC_009333	90420..90538	Peak	90513	119	0.5064663573	0.3062646507
NC_009333	91003..91050	Peak	91030	48	1.2613255592	0.1035957881
NC_009333	91411..91569	Peak	91499	159	0.8160991755	0.2072217077
NC_009333	91776..91941	Peak	91906	166	0.8688582044	0.1924623463
NC_009333	92155..92276	Peak	92190	122	0.3893926053	0.3484928707
NC_009333	92690..92719	Peak	92707	30	0.3474398422	0.3641304528
NC_009333	93156..93168	Peak	93161	13	0.2618056898	0.3967356261
NC_009333	93401..93601	Peak	93547	201	0.4280632956	0.3343025193
NC_009333	93761..93850	Peak	93841	90	1.5730476885	0.0578538882
NC_009333	94031..94207	Peak	94135	177	0.6375741149	0.2618754751
NC_009333	94416..94530	Peak	94457	115	0.7352506989	0.2310934137
NC_009333	95164..95186	Peak	95171	23	0.1506133859	0.4401403507
NC_009333	95298..95434	Peak	95410	137	0.2054613731	0.418605837
NC_009333	95693..95868	Peak	95828	176	0.3136018832	0.3769117145
NC_009333	96010..96112	Peak	96072	103	0.291106023	0.3854851168
NC_009333	96198..96370	Peak	96306	173	0.5708020291	0.2840669237
NC_009333	97010..97126	Peak	97049	117	0.7103588393	0.2387408204
NC_009333	97481..97644	Peak	97571	164	0.8560798334	0.1959768113
NC_009333	97787..97829	Peak	97812	43	0.5301083116	0.2980184183
NC_009333	98098..98115	Peak	98108	18	0.265369468	0.3953624271
NC_009333	98259..98300	Peak	98295	42	0.2777907461	0.3905864976
NC_009333	98638..98687	Peak	98648	50	0.2220492447	0.4121377742
NC_009333	98974..99108	Peak	98998	135	0.6669442726	0.2524038651
NC_009333	99348..99448	Peak	99409	101	0.4391140238	0.330289459
NC_009333	99833..99895	Peak	99854	63	0.187162857	0.425766473
NC_009333	100189..100349	Peak	100308	161	0.4279424821	0.3343464985
NC_009333	100460..100640	Peak	100526	181	0.3890909766	0.3486044241
NC_009333	100697..100737	Peak	100709	41	0.2693767219	0.3938198988
NC_009333	101404..101452	Peak	101431	49	0.4026704057	0.3435953539
NC_009333	101830..101941	Peak	101878	112	0.2870862383	0.3870231445
NC_009333	102272..102288	Peak	102274	17	0.1935954949	0.423246313
NC_009333	102475..102584	Peak	102544	110	0.3730547315	0.3545538548
NC_009333	102816..102907	Peak	102856	92	0.6065875063	0.2720623468
NC_009333	102907..103042	Peak	103030	136	0.5729072826	0.2833537367
NC_009333	103386..103475	Peak	103437	90	0.5065553703	0.3062334148
NC_009333	103762..103944	Peak	103897	183	0.4647557152	0.3210532022
NC_009333	104221..104240	Peak	104225	20	0.1731478161	0.4312676203
NC_009333	104581..104699	Peak	104688	119	0.4511248085	0.3259497992
NC_009333	104960..105055	Peak	105015	96	0.1400264239	0.4443195564
NC_009333	105335..105430	Peak	105390	96	0.1400264239	0.4443195564
NC_009333	106142..106258	Peak	106251	117	0.3873744867	0.3492394944
NC_009333	106489..106521	Peak	106509	33	0.5105573953	0.3048305076
NC_009333	106974..106997	Peak	106985	24	0.1719595332	0.4317346714
NC_009333	107363..107492	Peak	107469	130	0.3519221917	0.362448308
NC_009333	107634..107648	Peak	107641	15	0.0685447108	0.4726760148
NC_009333	108140..108219	Peak	108188	80	0.1279210666	0.4491057196
NC_009333	108346..108441	Peak	108401	96	0.1400264239	0.4443195564
NC_009333	108637..108661	Peak	108647	25	0.170159929	0.4324421821
NC_009333	109039..109060	Peak	109049	22	0.4711490778	0.31876714
NC_009333	109699..109794	Peak	109754	96	0.1400264239	0.4443195564
NC_009333	110492..110494	Peak	110494	3	0.011910413	0.495248545
NC_009333	110735..110816	Peak	110790	82	0.1391479621	0.4446666143
NC_009333	111217..111358	Peak	111285	142	0.3114289566	0.3777372717
NC_009333	111764..111889	Peak	111860	126	0.507306114	0.3059700247
NC_009333	112616..112748	Peak	112700	133	0.8770614141	0.1902266407
NC_009333	112909..112926	Peak	112915	18	0.6880806522	0.2457009968
NC_009333	113226..113394	Peak	113369	169	0.4868236404	0.3131916579
NC_009333	113919..114014	Peak	113975	96	0.3354171576	0.3686552135
NC_009333	114236..114294	Peak	114269	59	0.1750250839	0.4305299619
NC_009333	114500..114589	Peak	114558	90	0.2658573636	0.3951745313
NC_009333	114853..114909	Peak	114879	57	0.1950035829	0.4226950713
NC_009333	115243..115318	Peak	115275	76	0.5261269921	0.2993999878
NC_009333	115521..115541	Peak	115536	21	0.4153876836	0.3389290607
NC_009333	115654..115738	Peak	115698	85	0.4171222021	0.3382945131
NC_009333	115895..115976	Peak	115950	82	0.1400264239	0.4443195564
NC_009333	116175..116275	Peak	116257	101	0.2906855319	0.3856459189
NC_009333	116771..116900	Peak	116808	130	0.5257907869	0.2995167883
NC_009333	117199..117235	Peak	117231	37	0.1579656124	0.4372419479
NC_009333	117389..117497	Peak	117461	109	0.7076202319	0.2395905627
NC_009333	117614..117724	Peak	117638	111	0.7158718045	0.2370352549
NC_009333	117997..118085	Peak	118012	89	0.7331781516	0.2317248896
NC_009333	118799..118888	Peak	118847	90	0.187162857	0.425766473
NC_009333	119119..119259	Peak	119199	141	0.2936504011	0.3845125291
NC_009333	119389..119426	Peak	119396	38	0.3802022357	0.3518976499
NC_009333	119584..119653	Peak	119647	70	1.1983598149	0.1153884848
NC_009333	119987..120009	Peak	119999	23	0.1926840709	0.4236031996
NC_009333	120144..120192	Peak	120192	49	0.1143809004	0.4544679269
NC_009333	120405..120544	Peak	120465	140	0.3809558178	0.3516180166
NC_009333	121045..121170	Peak	121077	126	0.6613043041	0.2542085909
NC_009333	121493..121517	Peak	121504	25	0.1926840709	0.4236031996
NC_009333	122016..122119	Peak	122047	104	0.5799397335	0.2809776299
NC_009333	122261..122302	Peak	122277	42	0.7303183042	0.2325978211
NC_009333	122511..122679	Peak	122638	169	0.6552083512	0.2561668091
NC_009333	122907..122935	Peak	122916	29	0.5478728301	0.291889613
NC_009333	123087..123152	Peak	123105	66	0.4464313307	0.3276428527
NC_009333	123397..123443	Peak	123430	47	0.5509194034	0.2908444628
NC_009333	123617..123745	Peak	123703	129	0.8084240813	0.2094232469
NC_009333	124088..124143	Peak	124128	56	0.5427055709	0.293666269
NC_009333	124250..124338	Peak	124300	89	1.092532647	0.1372995244
NC_009333	124842..124986	Peak	124874	145	2.1537554239	0.0156296786
NC_009333	125350..125536	Peak	125378	187	0.9424951302	0.1729696016
NC_009333	126300..126418	Peak	126331	119	4.5818845132	2.304E-6
NC_009333	126823..126916	Peak	126848	94	0.3424679645	0.3659993743
NC_009333	126977..127082	Peak	127074	106	0.2947346297	0.3840983035
NC_009333	127483..127577	Peak	127539	95	0.2365037117	0.4065209137
NC_009333	127677..127808	Peak	127778	132	0.2802097186	0.3896583054
NC_009333	127988..128134	Peak	128062	147	0.547684001	0.2919544498
NC_009333	128474..128593	Peak	128550	120	0.3256453256	0.3723463575
NC_009333	128731..128920	Peak	128871	190	0.4544246016	0.3247616243
NC_009333	129023..129122	Peak	129108	100	0.3010774698	0.3816777105
NC_009333	129493..129521	Peak	129518	29	0.1562878821	0.4379030538
NC_009333	129901..129947	Peak	129910	47	0.7948955621	0.213337128
NC_009333	130807..130863	Peak	130821	57	0.556985695	0.2887686015
NC_009333	131166..131170	Peak	131168	5	0.2213901981	0.4123943119
NC_009333	131511..131591	Peak	131550	81	0.187162857	0.425766473
NC_009333	131843..132005	Peak	131966	163	0.2386593711	0.4056848618
NC_009333	132854..132949	Peak	132909	96	0.1400264239	0.4443195564
NC_009333	133519..133539	Peak	133533	21	0.4693084	0.319424606
NC_009333	133989..134107	Peak	134036	119	0.3749706596	0.3538411438
NC_009333	134425..134594	Peak	134436	170	0.7031007771	0.240996474
NC_009333	135116..135230	Peak	135146	115	1.0982071545	0.1360570214
NC_009333	135565..135641	Peak	135622	77	1.2773990059	0.1007307078
NC_009333	136142..136228	Peak	136184	87	1.0330702164	0.1507855201
NC_009333	136647..136698	Peak	136665	52	1.3612708377	0.0867140576
NC_009333	136950..137034	Peak	136961	85	0.626341165	0.2655455956
NC_009333	137430..137465	Peak	137462	36	0.2437748419	0.4037026029
