# Supplementary material for: Epigenetic Reprogramming of Kaposi’s Sarcoma-Associated Herpesvirus during Hypoxic Reactivation
Source: Cancers (Basel). 2022 Nov 2;14(21):5396. doi: 10.3390/cancers14215396 (PMC9654037; doi:10.3390/cancers14215396)
Supplement: Supplementary file 1 [file cancers-14-05396-s001.zip › LANA Normoxia.csv]

Chromosome	Region	Name	Center of peak	Length	Peak shape score	P-value
NC_009333	<1..20	Peak	20	21	0.0308140059	0.4877089353
NC_009333	145..154	Peak	152	10	0.1230319162	0.4510409122
NC_009333	216..273	Peak	240	58	0.8648605912	0.193557655
NC_009333	341..359	Peak	348	19	0.0460936879	0.4816177885
NC_009333	432..458	Peak	446	27	0.096511686	0.4615570966
NC_009333	496..529	Peak	511	34	0.1463786873	0.4418112256
NC_009333	1007..1021	Peak	1014	15	0.1047710356	0.4582787469
NC_009333	1121..1134	Peak	1128	14	0.050955082	0.4796806567
NC_009333	1231..1257	Peak	1239	27	0.1117640355	0.4555052521
NC_009333	1292..1303	Peak	1299	12	0.0765052167	0.4695085819
NC_009333	1449..1459	Peak	1455	11	0.0272762031	0.4891197185
NC_009333	1514..1556	Peak	1550	43	0.1682616871	0.4331887067
NC_009333	1602..1649	Peak	1632	48	0.4060342588	0.3423587143
NC_009333	1773..1827	Peak	1797	55	0.6424235662	0.2602991012
NC_009333	1908..1958	Peak	1929	51	0.3141818935	0.3766914469
NC_009333	2114..2138	Peak	2127	25	0.096154264	0.4616990273
NC_009333	2182..2194	Peak	2189	13	0.0513518134	0.4795225907
NC_009333	2280..2340	Peak	2319	61	0.3647192397	0.3576604977
NC_009333	2455..2492	Peak	2468	38	0.6547046449	0.2563289671
NC_009333	2569..2574	Peak	2570	6	0.0526469259	0.4790066137
NC_009333	2707..2763	Peak	2740	57	0.3201583707	0.3744241395
NC_009333	2911..2965	Peak	2946	55	0.2378570994	0.4059959652
NC_009333	3073..3116	Peak	3102	44	0.0684591518	0.4727100679
NC_009333	3255..3272	Peak	3257	18	0.0201415179	0.4919652402
NC_009333	3407..3456	Peak	3415	50	0.1286126606	0.4488320739
NC_009333	3459..3488	Peak	3474	30	0.194722903	0.4228049406
NC_009333	3686..3718	Peak	3697	33	0.0115160509	0.4954058619
NC_009333	3837..3891	Peak	3854	55	0.103627351	0.4587325408
NC_009333	4237..4285	Peak	4261	49	0.1341060897	0.4466593421
NC_009333	4316..4334	Peak	4334	19	0.0188999148	0.4924604737
NC_009333	4577..4636	Peak	4623	60	0.3570547884	0.360525395
NC_009333	4700..4752	Peak	4721	53	0.9002693593	0.1839884615
NC_009333	4967..4994	Peak	4991	28	0.043768336	0.4825445335
NC_009333	5069..5081	Peak	5075	13	0.0532498935	0.4787664014
NC_009333	5119..5179	Peak	5161	61	0.1114095284	0.4556458023
NC_009333	5199..5256	Peak	5214	58	0.1059792629	0.4577994026
NC_009333	5325..5379	Peak	5346	55	1.6462731516	0.0498537673
NC_009333	5477..5528	Peak	5494	52	0.103627351	0.4587325408
NC_009333	5607..5616	Peak	5608	10	9.924E-3	0.4960411254
NC_009333	5677..5724	Peak	5691	48	0.2653619667	0.3953653162
NC_009333	5928..5974	Peak	5943	47	0.0932312015	0.4628599436
NC_009333	6038..6062	Peak	6054	25	0.130872258	0.4479381804
NC_009333	6116..6169	Peak	6146	54	0.2870551297	0.3870350541
NC_009333	6344..6351	Peak	6347	8	3.761E-3	0.4984996139
NC_009333	6502..6555	Peak	6538	54	0.1008954475	0.4598167285
NC_009333	6570..6632	Peak	6610	63	0.0143759758	0.494265013
NC_009333	6663..6707	Peak	6680	45	0.0115160509	0.4954058619
NC_009333	6689..6769	Peak	6742	81	0.0115160509	0.4954058619
NC_009333	6932..6983	Peak	6948	52	0.2043402547	0.4190438074
NC_009333	7119..7127	Peak	7122	9	0.0115160509	0.4954058619
NC_009333	7198..7210	Peak	7208	13	0.0115160509	0.4954058619
NC_009333	7272..7331	Peak	7296	60	0.2468177445	0.4025246386
NC_009333	7391..7435	Peak	7399	45	0.1207855447	0.45193045
NC_009333	7560..7583	Peak	7566	24	0.0892706471	0.4644334106
NC_009333	7699..7710	Peak	7709	12	0.0525698854	0.4790373059
NC_009333	7804..7811	Peak	7806	8	0.0117643423	0.4953068147
NC_009333	7906..7931	Peak	7921	26	0.1033588033	0.4588391036
NC_009333	8089..8138	Peak	8120	50	0.4217873853	0.3365901071
NC_009333	8189..8197	Peak	8189	9	0.0115475917	0.4953932798
NC_009333	8283..8313	Peak	8293	31	0.0478274155	0.4809268936
NC_009333	8442..8485	Peak	8457	44	0.0913146788	0.4636212774
NC_009333	8566..8573	Peak	8573	8	0.0114185122	0.4954447717
NC_009333	8700..8702	Peak	8702	3	2.049E-3	0.4991824974
NC_009333	8847..8867	Peak	8856	21	0.0473077831	0.4811339625
NC_009333	8930..8990	Peak	8967	61	0.2298492008	0.4091044757
NC_009333	9145..9197	Peak	9174	53	0.3735044562	0.3543865147
NC_009333	9267	Peak	9267	1	9.842E-6	0.4999960736
NC_009333	9327..9381	Peak	9345	55	0.1271537792	0.4494093436
NC_009333	9383..9430	Peak	9407	48	0.1484368016	0.4409990291
NC_009333	9527..9553	Peak	9532	27	0.0115160509	0.4954058619
NC_009333	9628..9688	Peak	9648	61	0.0115160509	0.4954058619
NC_009333	9724..9740	Peak	9734	17	0.0115160509	0.4954058619
NC_009333	9794..9802	Peak	9801	9	0.0115160509	0.4954058619
NC_009333	9856..9881	Peak	9857	26	0.0115160509	0.4954058619
NC_009333	9937..9973	Peak	9953	37	0.0115160509	0.4954058619
NC_009333	10077..10085	Peak	10078	9	1.12E-3	0.4995532241
NC_009333	10163..10199	Peak	10166	37	0.0115160509	0.4954058619
NC_009333	10251..10273	Peak	10256	23	0.0115160509	0.4954058619
NC_009333	10322..10348	Peak	10336	27	0.0236471188	0.4905670436
NC_009333	10406..10417	Peak	10416	12	0.0557945588	0.4777527348
NC_009333	10514..10556	Peak	10529	43	0.1458405729	0.4420236229
NC_009333	10578..10627	Peak	10592	50	0.1384833897	0.4449291981
NC_009333	10745..10762	Peak	10753	18	6.68E-3	0.4973350916
NC_009333	10801..10806	Peak	10804	6	0.0148182898	0.494088574
NC_009333	10874..10925	Peak	10898	52	0.2195704587	0.4131028503
NC_009333	10948..10975	Peak	10972	28	0.0687475821	0.4725952714
NC_009333	11032..11084	Peak	11056	53	0.3886116218	0.3487817342
NC_009333	11161	Peak	11161	1	2.642E-4	0.4998946072
NC_009333	11302..11350	Peak	11327	49	0.2212794582	0.4124374218
NC_009333	11583..11632	Peak	11600	50	0.103627351	0.4587325408
NC_009333	11786..11831	Peak	11831	46	0.0115160509	0.4954058619
NC_009333	11906..11948	Peak	11924	43	0.0866208738	0.4654864367
NC_009333	12019..12049	Peak	12019	31	0.0191735751	0.4923513189
NC_009333	12099..12120	Peak	12110	22	0.0236471188	0.4905670436
NC_009333	12188..12242	Peak	12210	55	0.1570899648	0.4375869732
NC_009333	12285..12329	Peak	12293	45	0.0824574243	0.4671414867
NC_009333	12386..12448	Peak	12432	63	0.1341060897	0.4466593421
NC_009333	12508..12564	Peak	12532	57	0.2228931059	0.4118093511
NC_009333	12639..12681	Peak	12662	43	0.1330006162	0.4470964466
NC_009333	12755..12805	Peak	12770	51	0.2001862873	0.4206674456
NC_009333	12805..12839	Peak	12824	35	0.2062942409	0.4182805384
NC_009333	12908..12970	Peak	12929	63	0.1341060897	0.4466593421
NC_009333	13085..13092	Peak	13088	8	3.761E-3	0.4984996139
NC_009333	13281..13298	Peak	13289	18	0.1802572131	0.4284753222
NC_009333	13388..13442	Peak	13396	55	0.0247295681	0.4901353352
NC_009333	13448..13501	Peak	13488	54	0.0115160509	0.4954058619
NC_009333	13713..13729	Peak	13722	17	0.0115160509	0.4954058619
NC_009333	13814..13822	Peak	13815	9	1.12E-3	0.4995532241
NC_009333	13939..13993	Peak	13956	55	0.103627351	0.4587325408
NC_009333	14104..14111	Peak	14107	8	0.0176294499	0.4929672313
NC_009333	14306..14362	Peak	14330	57	0.1341060897	0.4466593421
NC_009333	14457..14505	Peak	14481	49	0.2035116626	0.4193675655
NC_009333	14603..14657	Peak	14620	55	0.103627351	0.4587325408
NC_009333	14725..14763	Peak	14746	39	0.0115160509	0.4954058619
NC_009333	14818..14870	Peak	14842	53	0.1190685095	0.4526105395
NC_009333	14932..14961	Peak	14932	30	0.0215332987	0.4914101205
NC_009333	15021..15078	Peak	15040	58	0.0115160509	0.4954058619
NC_009333	15157..15195	Peak	15182	39	0.0115160509	0.4954058619
NC_009333	15749..15761	Peak	15754	13	0.0115160509	0.4954058619
NC_009333	15838..15846	Peak	15839	9	1.12E-3	0.4995532241
NC_009333	15944..15956	Peak	15956	13	0.0115160509	0.4954058619
NC_009333	16033..16041	Peak	16034	9	1.12E-3	0.4995532241
NC_009333	16120..16176	Peak	16144	57	0.1341060897	0.4466593421
NC_009333	16289..16345	Peak	16313	57	0.1341060897	0.4466593421
NC_009333	16527..16583	Peak	16551	57	0.1341060897	0.4466593421
NC_009333	16618..16664	Peak	16640	47	0.1550649769	0.4383850463
NC_009333	16689..16734	Peak	16707	46	0.2109231618	0.4164736151
NC_009333	16805..16807	Peak	16807	3	8.834E-3	0.4964756376
NC_009333	16917..16968	Peak	16941	52	0.5755429583	0.2824620731
NC_009333	16980..17036	Peak	17004	57	0.4624813094	0.3218681013
NC_009333	17112..17159	Peak	17128	48	0.4580964267	0.323441583
NC_009333	17340..17374	Peak	17349	35	0.1589150265	0.4368679108
NC_009333	17466..17518	Peak	17503	53	0.2148527298	0.4149410702
NC_009333	17588..17635	Peak	17615	48	0.184462108	0.4268254752
NC_009333	17707..17742	Peak	17724	36	0.1524867779	0.4394015091
NC_009333	17826..17875	Peak	17849	50	0.028171332	0.488762751
NC_009333	17948..18001	Peak	17972	54	0.3149259831	0.3764089265
NC_009333	18067..18118	Peak	18084	52	0.103627351	0.4587325408
NC_009333	18281..18301	Peak	18288	21	0.0115160509	0.4954058619
NC_009333	18361..18368	Peak	18364	8	3.761E-3	0.4984996139
NC_009333	18473..18482	Peak	18480	10	0.0115160509	0.4954058619
NC_009333	18544..18597	Peak	18574	54	0.2958543622	0.3836706526
NC_009333	18654..18703	Peak	18663	50	0.1085945139	0.4567620562
NC_009333	18797..18837	Peak	18812	41	0.0766188929	0.4694633644
NC_009333	18960..19016	Peak	18984	57	0.1341060897	0.4466593421
NC_009333	19117..19124	Peak	19120	8	3.761E-3	0.4984996139
NC_009333	19263..19312	Peak	19279	50	0.3529422832	0.3620658553
NC_009333	19383..19401	Peak	19400	19	0.0115160509	0.4954058619
NC_009333	19644..19647	Peak	19645	4	0.0115160509	0.4954058619
NC_009333	19725..19763	Peak	19737	39	0.2418776283	0.4044374928
NC_009333	19865..19889	Peak	19873	25	0.066840757	0.4733542383
NC_009333	20086..20129	Peak	20106	44	0.0849543699	0.4661488335
NC_009333	20170..20190	Peak	20182	21	0.0909648249	0.4637602704
NC_009333	20231..20286	Peak	20271	56	0.1558937747	0.4380583762
NC_009333	20349..20385	Peak	20360	37	0.1510023014	0.4399869502
NC_009333	20434..20486	Peak	20463	53	0.3905393561	0.3480688796
NC_009333	20960..20967	Peak	20963	8	3.761E-3	0.4984996139
NC_009333	21063..21064	Peak	21063	2	0.0115160509	0.4954058619
NC_009333	21141..21149	Peak	21142	9	1.12E-3	0.4995532241
NC_009333	21232..21277	Peak	21266	46	0.4554827565	0.3243809851
NC_009333	21372..21406	Peak	21373	35	0.0179937133	0.4928219343
NC_009333	21468..21515	Peak	21491	48	0.0115160509	0.4954058619
NC_009333	21580..21596	Peak	21590	17	0.0115160509	0.4954058619
NC_009333	21693..21751	Peak	21717	59	0.2806581591	0.3894863018
NC_009333	21914..21921	Peak	21917	8	3.761E-3	0.4984996139
NC_009333	22158..22177	Peak	22166	20	0.0236471188	0.4905670436
NC_009333	22234..22286	Peak	22249	53	0.0918449969	0.4634105964
NC_009333	22400..22437	Peak	22428	38	0.0509865317	0.4796681264
NC_009333	22518..22563	Peak	22526	46	0.110088217	0.4561697064
NC_009333	22652..22698	Peak	22673	47	0.8064963619	0.2099783524
NC_009333	22859..22915	Peak	22883	57	0.1341060897	0.4466593421
NC_009333	23092..23100	Peak	23093	9	1.12E-3	0.4995532241
NC_009333	23207..23245	Peak	23215	39	0.0668574476	0.4733475945
NC_009333	23318..23364	Peak	23324	47	0.0115160509	0.4954058619
NC_009333	23364..23402	Peak	23402	39	0.0236471188	0.4905670436
NC_009333	23480..23532	Peak	23504	53	2.3074447946	0.0105150182
NC_009333	23614..23655	Peak	23631	42	0.1184062402	0.4528728908
NC_009333	23680..23722	Peak	23709	43	0.0740018774	0.4705044457
NC_009333	23776..23832	Peak	23800	57	0.1341060897	0.4466593421
NC_009333	23919..23957	Peak	23931	39	0.2982209345	0.3827672724
NC_009333	24044..24086	Peak	24064	43	0.0115160509	0.4954058619
NC_009333	24137..24169	Peak	24150	33	0.0115160509	0.4954058619
NC_009333	24331..24398	Peak	24352	68	0.0115160509	0.4954058619
NC_009333	24508..24565	Peak	24519	58	0.0115160509	0.4954058619
NC_009333	24588..24645	Peak	24623	58	0.0115160509	0.4954058619
NC_009333	24685..24731	Peak	24725	47	0.0236471188	0.4905670436
NC_009333	24803..24831	Peak	24809	29	0.0593223805	0.4763476677
NC_009333	24947..24959	Peak	24953	13	0.0115160509	0.4954058619
NC_009333	25069..25124	Peak	25092	56	0.1328990278	0.4471366179
NC_009333	25223..25245	Peak	25230	23	0.0444446398	0.4822749897
NC_009333	25312..25315	Peak	25313	4	0.0115160509	0.4954058619
NC_009333	25471..25478	Peak	25477	8	0.0504216071	0.4798932092
NC_009333	25749..25801	Peak	25772	53	1.3603009771	0.0868673497
NC_009333	25883..25926	Peak	25891	44	0.0284083633	0.488668227
NC_009333	25989..26027	Peak	25989	39	0.0115160509	0.4954058619
NC_009333	26068..26124	Peak	26111	57	0.0115160509	0.4954058619
NC_009333	26207..26257	Peak	26228	51	0.477904209	0.3163591928
NC_009333	26353..26390	Peak	26369	38	0.1545000237	0.4386077463
NC_009333	26543..26554	Peak	26553	12	0.0731902922	0.4708273457
NC_009333	26636..26692	Peak	26659	57	0.2568005783	0.3986663618
NC_009333	26817..26870	Peak	26841	54	0.5624677043	0.2868987008
NC_009333	27018..27072	Peak	27050	55	0.2145283235	0.415067541
NC_009333	27152..27166	Peak	27161	15	0.0410727145	0.4836189635
NC_009333	27292..27348	Peak	27316	57	0.1341060897	0.4466593421
NC_009333	27479..27486	Peak	27483	8	0.0115160509	0.4954058619
NC_009333	27640..27653	Peak	27648	14	0.0446845812	0.4821793619
NC_009333	27816..27838	Peak	27836	23	0.0115160509	0.4954058619
NC_009333	27907..27914	Peak	27910	8	3.761E-3	0.4984996139
NC_009333	28042..28065	Peak	28058	24	5.515E-3	0.4977997721
NC_009333	28149..28185	Peak	28168	37	0.1727235557	0.4314343637
NC_009333	28226..28279	Peak	28250	54	0.3154151462	0.3762232342
NC_009333	28438..28439	Peak	28439	2	3.65E-3	0.498543843
NC_009333	28644..28699	Peak	28664	56	0.1455232122	0.4421488951
NC_009333	28842..28893	Peak	28856	52	0.0115160509	0.4954058619
NC_009333	28984..28992	Peak	28985	9	1.12E-3	0.4995532241
NC_009333	29294..29340	Peak	29322	47	0.2370055346	0.4063262483
NC_009333	29397..29437	Peak	29408	41	0.1745761306	0.4307063528
NC_009333	29580..29629	Peak	29595	50	0.508672764	0.3054908081
NC_009333	29756..29790	Peak	29771	35	0.1364374642	0.4457377292
NC_009333	29868..29907	Peak	29877	40	0.1395396944	0.4445118456
NC_009333	30100..30152	Peak	30124	53	0.1602605464	0.4363379182
NC_009333	30200..30244	Peak	30200	45	0.0279963266	0.4888325405
NC_009333	30313..30361	Peak	30332	49	0.088340432	0.4648030523
NC_009333	30502..30561	Peak	30526	60	0.201023375	0.4203401483
NC_009333	30718..30727	Peak	30720	10	0.020830324	0.491690504
NC_009333	30833..30881	Peak	30857	49	1.043100893	0.1484507836
NC_009333	30959..30979	Peak	30969	21	0.0682613156	0.472788809
NC_009333	31163..31171	Peak	31164	9	1.12E-3	0.4995532241
NC_009333	31248..31256	Peak	31249	9	1.12E-3	0.4995532241
NC_009333	31366..31415	Peak	31383	50	0.103627351	0.4587325408
NC_009333	31605..31655	Peak	31619	51	0.0915513967	0.4635272345
NC_009333	31893..31947	Peak	31924	55	0.0115160509	0.4954058619
NC_009333	32030..32037	Peak	32033	8	3.761E-3	0.4984996139
NC_009333	32080..32103	Peak	32096	24	5.515E-3	0.4977997721
NC_009333	32166..32173	Peak	32169	8	3.761E-3	0.4984996139
NC_009333	32265..32311	Peak	32284	47	0.1917300925	0.4239768164
NC_009333	32507..32510	Peak	32510	4	0.0186358006	0.4925658215
NC_009333	32587..32593	Peak	32592	7	0.0585772054	0.4766444335
NC_009333	32644..32670	Peak	32650	27	0.0540460118	0.4784492528
NC_009333	32754..32780	Peak	32757	27	0.0115160509	0.4954058619
NC_009333	32808..32848	Peak	32823	41	0.0115160509	0.4954058619
NC_009333	32940..32999	Peak	32964	60	0.087694841	0.4650596101
NC_009333	33090..33114	Peak	33109	25	0.0115160509	0.4954058619
NC_009333	33194..33255	Peak	33233	62	0.0115160509	0.4954058619
NC_009333	33303..33365	Peak	33322	63	0.0115160509	0.4954058619
NC_009333	33492..33548	Peak	33516	57	0.1341060897	0.4466593421
NC_009333	33712..33753	Peak	33738	42	0.0680962196	0.4728545198
NC_009333	33882..33936	Peak	33899	55	0.103627351	0.4587325408
NC_009333	34048..34089	Peak	34088	42	0.0115160509	0.4954058619
NC_009333	34166..34194	Peak	34175	29	0.0433752798	0.4827011915
NC_009333	34362..34376	Peak	34375	15	0.0344050893	0.4862770626
NC_009333	34459..34500	Peak	34469	42	0.0534772167	0.4786758415
NC_009333	34623..34671	Peak	34647	49	0.2891416546	0.3862364893
NC_009333	34815..34870	Peak	34839	56	0.1954277105	0.4225290625
NC_009333	35015..35068	Peak	35039	54	0.3207243336	0.3742096526
NC_009333	35154..35216	Peak	35194	63	0.0115160509	0.4954058619
NC_009333	35423..35473	Peak	35439	51	0.1026781809	0.4591091956
NC_009333	35549..35556	Peak	35552	8	3.761E-3	0.4984996139
NC_009333	35880..35904	Peak	35903	25	0.0115160509	0.4954058619
NC_009333	35977..36022	Peak	35997	46	0.2079373716	0.4176389343
NC_009333	36120..36143	Peak	36132	24	0.071577115	0.4714692265
NC_009333	36618..36671	Peak	36648	54	0.4361040041	0.3313806361
NC_009333	36732..36762	Peak	36734	31	0.0525136062	0.4790597271
NC_009333	36811..36839	Peak	36824	29	0.1142683819	0.4545125229
NC_009333	37006..37040	Peak	37020	35	0.1099049633	0.4562423731
NC_009333	37171..37225	Peak	37188	55	0.103627351	0.4587325408
NC_009333	37362..37415	Peak	37386	54	0.4139546146	0.3394536727
NC_009333	37473..37524	Peak	37493	52	0.2480175601	0.4020604101
NC_009333	37582..37610	Peak	37582	29	0.0345017515	0.4862385229
NC_009333	37732..37781	Peak	37758	50	0.2134176328	0.4155006142
NC_009333	37891..37898	Peak	37894	8	3.761E-3	0.4984996139
NC_009333	38003..38037	Peak	38011	35	0.0632036345	0.4748021753
NC_009333	38138..38145	Peak	38141	8	3.761E-3	0.4984996139
NC_009333	38252..38308	Peak	38276	57	0.1341060897	0.4466593421
NC_009333	38395..38432	Peak	38430	38	0.0115160509	0.4954058619
NC_009333	38507..38560	Peak	38537	54	0.2411862854	0.4047053699
NC_009333	38597..38650	Peak	38627	54	0.1472446794	0.4414694479
NC_009333	38713..38769	Peak	38737	57	0.1341060897	0.4466593421
NC_009333	38928..38936	Peak	38929	9	1.12E-3	0.4995532241
NC_009333	39024..39075	Peak	39046	52	0.1025447335	0.4591621539
NC_009333	39127..39149	Peak	39137	23	0.0454521624	0.4818734522
NC_009333	39202..39249	Peak	39221	48	0.1676075989	0.4334459964
NC_009333	39322..39353	Peak	39333	32	0.0902379456	0.4640490656
NC_009333	39376..39415	Peak	39397	40	0.1802389225	0.4284825015
NC_009333	39560..39608	Peak	39584	49	0.3396424212	0.3670629138
NC_009333	39995..40020	Peak	40008	26	0.0115160509	0.4954058619
NC_009333	40099..40107	Peak	40100	9	1.12E-3	0.4995532241
NC_009333	40194..40201	Peak	40197	8	3.761E-3	0.4984996139
NC_009333	40306..40349	Peak	40327	44	0.0115160509	0.4954058619
NC_009333	40386..40405	Peak	40391	20	0.0115160509	0.4954058619
NC_009333	40452..40463	Peak	40459	12	0.0115160509	0.4954058619
NC_009333	40539..40582	Peak	40560	44	0.0115160509	0.4954058619
NC_009333	40612..40668	Peak	40651	57	0.0115160509	0.4954058619
NC_009333	40752..40792	Peak	40782	41	0.0115160509	0.4954058619
NC_009333	40792..40846	Peak	40835	55	0.0236471188	0.4905670436
NC_009333	40900..40950	Peak	40918	51	0.1470353758	0.441552049
NC_009333	41047..41096	Peak	41061	50	0.2002431237	0.4206452211
NC_009333	41145..41191	Peak	41145	47	0.0239498818	0.4904462929
NC_009333	41278..41285	Peak	41279	8	1.12E-3	0.4995532241
NC_009333	41394..41417	Peak	41410	24	5.515E-3	0.4977997721
NC_009333	41605..41651	Peak	41629	47	0.2398040598	0.4052410797
NC_009333	42059..42115	Peak	42076	57	0.103627351	0.4587325408
NC_009333	42188..42217	Peak	42204	30	0.1646678256	0.4346027213
NC_009333	42281..42320	Peak	42310	40	0.1603075887	0.4363193906
NC_009333	42382..42420	Peak	42393	39	0.0963260868	0.4616307966
NC_009333	42497..42539	Peak	42516	43	0.1203062628	0.4521202716
NC_009333	42701..42704	Peak	42704	4	0.0126081948	0.4949701913
NC_009333	42757..42800	Peak	42778	44	0.0993077605	0.4604469585
NC_009333	42908..42948	Peak	42927	41	0.0115160509	0.4954058619
NC_009333	43034..43048	Peak	43048	15	0.0259585666	0.4896451932
NC_009333	43119..43171	Peak	43143	53	0.5262520353	0.2993565521
NC_009333	43251..43266	Peak	43259	16	5.515E-3	0.4977997721
NC_009333	43340..43347	Peak	43343	8	3.761E-3	0.4984996139
NC_009333	43517..43573	Peak	43541	57	0.1359047611	0.4459482858
NC_009333	43573..43622	Peak	43607	50	0.0971349916	0.4613095965
NC_009333	43720..43766	Peak	43765	47	0.0115160509	0.4954058619
NC_009333	43843..43851	Peak	43844	9	1.12E-3	0.4995532241
NC_009333	43959..43980	Peak	43976	22	0.0115160509	0.4954058619
NC_009333	44056..44106	Peak	44080	51	0.1930128585	0.4234744489
NC_009333	44174..44193	Peak	44182	20	0.1285827655	0.4488439021
NC_009333	44360..44400	Peak	44398	41	0.0115160509	0.4954058619
NC_009333	44490..44503	Peak	44497	14	0.0276750457	0.4889606634
NC_009333	44550..44556	Peak	44553	7	0.0215213022	0.4914149053
NC_009333	44637..44675	Peak	44644	39	0.075339881	0.4699721456
NC_009333	44703..44771	Peak	44748	69	0.2331690633	0.4078150639
NC_009333	44818..44877	Peak	44842	60	0.0734926934	0.4707070291
NC_009333	44941..44957	Peak	44944	17	0.0115160509	0.4954058619
NC_009333	45048..45097	Peak	45074	50	0.214715474	0.4149945787
NC_009333	45160..45225	Peak	45184	66	0.1341060897	0.4466593421
NC_009333	45277..45330	Peak	45294	54	0.103627351	0.4587325408
NC_009333	45418..45429	Peak	45425	12	0.0115160509	0.4954058619
NC_009333	45438..45493	Peak	45473	56	0.0115160509	0.4954058619
NC_009333	45539..45582	Peak	45554	44	0.0115160509	0.4954058619
NC_009333	45582..45634	Peak	45606	53	0.0115160509	0.4954058619
NC_009333	45713..45762	Peak	45753	50	0.0115160509	0.4954058619
NC_009333	45892..45948	Peak	45916	57	0.1341060897	0.4466593421
NC_009333	46030..46078	Peak	46042	49	0.1049123641	0.458222674
NC_009333	46170..46213	Peak	46208	44	0.1158582364	0.4538824476
NC_009333	46387..46422	Peak	46413	36	0.0115160509	0.4954058619
NC_009333	46593..46599	Peak	46598	7	0.0115160509	0.4954058619
NC_009333	46700..46746	Peak	46733	47	0.0824664952	0.4671378802
NC_009333	46853..46922	Peak	46899	70	0.1341060897	0.4466593421
NC_009333	46969..47026	Peak	47003	58	0.1942290861	0.4229982545
NC_009333	47131..47181	Peak	47158	51	0.3027974437	0.3810221158
NC_009333	47238..47259	Peak	47238	22	0.0327474817	0.4869379796
NC_009333	47453..47515	Peak	47474	63	0.1341060897	0.4466593421
NC_009333	47550..47602	Peak	47567	53	0.112464737	0.4552274641
NC_009333	47737..47790	Peak	47761	54	0.1233609131	0.4509106537
NC_009333	47845..47863	Peak	47859	19	0.0102385815	0.4959154683
NC_009333	47959..47996	Peak	47959	38	0.0115160509	0.4954058619
NC_009333	48014..48066	Peak	48058	53	0.0115160509	0.4954058619
NC_009333	48066..48114	Peak	48109	49	0.0115160509	0.4954058619
NC_009333	48186..48240	Peak	48217	55	0.4622118673	0.3219646969
NC_009333	48405..48412	Peak	48411	8	0.0115160509	0.4954058619
NC_009333	48681..48728	Peak	48690	48	0.0115160509	0.4954058619
NC_009333	48807..48866	Peak	48831	60	0.5508810069	0.2908576241
NC_009333	49175..49229	Peak	49192	55	0.103627351	0.4587325408
NC_009333	49336..49384	Peak	49373	49	0.0115160509	0.4954058619
NC_009333	49468..49484	Peak	49469	17	0.0115160509	0.4954058619
NC_009333	49503..49551	Peak	49549	49	0.0115160509	0.4954058619
NC_009333	49638..49661	Peak	49645	24	0.0490380895	0.4804444707
NC_009333	49757..49797	Peak	49762	41	0.0115160509	0.4954058619
NC_009333	49964..50014	Peak	49977	51	0.0813447589	0.4675838897
NC_009333	50097..50147	Peak	50112	51	0.0932312015	0.4628599436
NC_009333	50257..50311	Peak	50274	55	0.103627351	0.4587325408
NC_009333	50380..50427	Peak	50404	48	0.193348559	0.4233429996
NC_009333	50505..50548	Peak	50529	44	0.082826551	0.4669947285
NC_009333	50655..50701	Peak	50679	47	0.1237656722	0.4507504062
NC_009333	50736..50782	Peak	50753	47	0.1148551612	0.454279963
NC_009333	50962..50996	Peak	50965	35	0.0115160509	0.4954058619
NC_009333	51148..51202	Peak	51165	55	0.103627351	0.4587325408
NC_009333	51303..51357	Peak	51318	55	0.0934558858	0.4627706972
NC_009333	51420..51476	Peak	51444	57	0.1811033882	0.4281432126
NC_009333	51553..51581	Peak	51556	29	0.0115160509	0.4954058619
NC_009333	51600..51643	Peak	51622	44	0.0115160509	0.4954058619
NC_009333	51756..51764	Peak	51763	9	0.069734406	0.4722025282
NC_009333	51815..51868	Peak	51839	54	0.4115891318	0.3403202994
NC_009333	51939..51951	Peak	51939	13	0.0179937133	0.4928219343
NC_009333	52035..52083	Peak	52080	49	0.0115160509	0.4954058619
NC_009333	52170..52196	Peak	52181	27	0.0115160509	0.4954058619
NC_009333	52296..52331	Peak	52320	36	0.0115160509	0.4954058619
NC_009333	52431..52458	Peak	52436	28	0.0115160509	0.4954058619
NC_009333	52601..52617	Peak	52609	17	0.0236471188	0.4905670436
NC_009333	52695..52746	Peak	52723	52	0.2591884626	0.3977449163
NC_009333	52869..52921	Peak	52890	53	0.1295819795	0.4484485807
NC_009333	53015..53056	Peak	53026	42	0.1444704737	0.4425644852
NC_009333	53168..53203	Peak	53193	36	0.0115160509	0.4954058619
NC_009333	53333..53387	Peak	53350	55	0.103627351	0.4587325408
NC_009333	53542..53582	Peak	53560	41	0.1020088523	0.4593748243
NC_009333	53688..53711	Peak	53692	24	0.0115160509	0.4954058619
NC_009333	53770..53777	Peak	53773	8	3.761E-3	0.4984996139
NC_009333	53820..53834	Peak	53834	15	4.497E-3	0.4982060921
NC_009333	54089..54110	Peak	54102	22	0.0506082359	0.47981885
NC_009333	54224..54274	Peak	54241	51	0.4175968629	0.3381209454
NC_009333	54356..54415	Peak	54377	60	0.1135738913	0.4547877926
NC_009333	54418..54480	Peak	54442	63	0.1097265688	0.4563131144
NC_009333	54668..54721	Peak	54692	54	0.1233609131	0.4509106537
NC_009333	54773..54795	Peak	54780	23	0.023159877	0.4907613717
NC_009333	54847..54891	Peak	54860	45	0.0115160509	0.4954058619
NC_009333	54911..54972	Peak	54932	62	0.0115160509	0.4954058619
NC_009333	55030..55092	Peak	55069	63	0.0115160509	0.4954058619
NC_009333	55104..55171	Peak	55125	68	0.0115160509	0.4954058619
NC_009333	55203..55234	Peak	55218	32	0.0115160509	0.4954058619
NC_009333	55355..55382	Peak	55379	28	0.0115160509	0.4954058619
NC_009333	55541..55579	Peak	55550	39	0.1271871573	0.4493961349
NC_009333	55605..55644	Peak	55622	40	0.0719101162	0.4713367197
NC_009333	55719..55770	Peak	55740	52	0.1124366802	0.4552385866
NC_009333	55978..55995	Peak	55993	18	0.0115160509	0.4954058619
NC_009333	56077..56116	Peak	56086	40	0.1691175646	0.4328520847
NC_009333	56234..56288	Peak	56251	55	0.085588516	0.4658967639
NC_009333	56464..56510	Peak	56466	47	0.0115160509	0.4954058619
NC_009333	56615..56671	Peak	56639	57	0.2509518085	0.4009256841
NC_009333	56866..56921	Peak	56890	56	0.1019925937	0.4593812769
NC_009333	57039..57047	Peak	57040	9	1.12E-3	0.4995532241
NC_009333	57132..57180	Peak	57171	49	0.0236471188	0.4905670436
NC_009333	57230..57277	Peak	57254	48	0.1959460969	0.4223261782
NC_009333	57478..57510	Peak	57484	33	0.0899658902	0.4641571603
NC_009333	57599..57641	Peak	57607	43	0.0558411723	0.4777341677
NC_009333	57716..57734	Peak	57721	19	0.0118778808	0.4952615226
NC_009333	57813..57833	Peak	57827	21	0.043321275	0.4827227161
NC_009333	57934..57985	Peak	57970	52	0.0115160509	0.4954058619
NC_009333	58097..58117	Peak	58104	21	0.0390114061	0.4844406474
NC_009333	58193..58258	Peak	58212	66	0.136603743	0.4456720089
NC_009333	58330..58381	Peak	58347	52	0.1937803548	0.423173935
NC_009333	58461..58490	Peak	58485	30	0.0115160509	0.4954058619
NC_009333	58765..58823	Peak	58789	59	0.1755925188	0.4303070401
NC_009333	58923..58973	Peak	58945	51	2.0890728475	0.0183505831
NC_009333	59044..59060	Peak	59055	17	0.1416612322	0.4436737991
NC_009333	59407..59454	Peak	59421	48	0.168241136	0.4331967902
NC_009333	59587..59597	Peak	59596	11	0.0469301094	0.4812844653
NC_009333	59757..59797	Peak	59783	41	0.3504675103	0.3629939344
NC_009333	59879..59930	Peak	59907	52	0.1466696372	0.4416963927
NC_009333	60013..60065	Peak	60042	53	0.3226653876	0.3734743339
NC_009333	60154..60166	Peak	60162	13	0.0160011993	0.4936167175
NC_009333	60361..60369	Peak	60362	9	1.12E-3	0.4995532241
NC_009333	60469..60472	Peak	60470	4	0.0115160509	0.4954058619
NC_009333	60535..60542	Peak	60538	8	3.761E-3	0.4984996139
NC_009333	60585..60608	Peak	60601	24	5.515E-3	0.4977997721
NC_009333	60705..60713	Peak	60706	9	1.12E-3	0.4995532241
NC_009333	60901..60922	Peak	60921	22	0.0115160509	0.4954058619
NC_009333	61141..61148	Peak	61144	8	3.761E-3	0.4984996139
NC_009333	61256..61275	Peak	61273	20	0.0115160509	0.4954058619
NC_009333	61361..61368	Peak	61362	8	1.12E-3	0.4995532241
NC_009333	61446..61453	Peak	61446	8	1.12E-3	0.4995532241
NC_009333	61565..61600	Peak	61587	36	0.0115160509	0.4954058619
NC_009333	61677..61733	Peak	61700	57	0.3745778713	0.3539872165
NC_009333	61863..61876	Peak	61870	14	0.0582090009	0.4767910756
NC_009333	62047	Peak	62047	1	0.0115160509	0.4954058619
NC_009333	62106..62113	Peak	62109	8	3.761E-3	0.4984996139
NC_009333	62155..62161	Peak	62161	7	6.179E-3	0.4975349925
NC_009333	62209..62232	Peak	62224	24	0.0514071508	0.4795005434
NC_009333	62563..62611	Peak	62587	49	0.4734867149	0.3179329885
NC_009333	62689..62696	Peak	62689	8	0.0287968412	0.4885133101
NC_009333	62771..62776	Peak	62772	6	3.761E-3	0.4984996139
NC_009333	62819..62846	Peak	62835	28	0.0146699153	0.4941477605
NC_009333	62917..62938	Peak	62931	22	0.0386045201	0.4846028492
NC_009333	63051..63080	Peak	63060	30	0.0115160509	0.4954058619
NC_009333	63097..63129	Peak	63128	33	0.0115160509	0.4954058619
NC_009333	63403..63415	Peak	63414	13	0.0115160509	0.4954058619
NC_009333	63492..63500	Peak	63493	9	1.12E-3	0.4995532241
NC_009333	63577..63578	Peak	63578	2	0.0115160509	0.4954058619
NC_009333	63647..63670	Peak	63659	24	0.0669292888	0.4733189981
NC_009333	63740..63772	Peak	63759	33	0.0707144754	0.4718125
NC_009333	63841..63888	Peak	63865	48	0.698278151	0.2425016302
NC_009333	63918..63952	Peak	63946	35	0.1118261079	0.4554806431
NC_009333	64005..64048	Peak	64018	44	0.099414658	0.4604045225
NC_009333	64078..64129	Peak	64091	52	0.0881005227	0.4648983905
NC_009333	64180..64212	Peak	64186	33	0.023159877	0.4907613717
NC_009333	64295..64313	Peak	64299	19	5.399E-3	0.4978459995
NC_009333	64380..64434	Peak	64404	55	0.279810414	0.3898114807
NC_009333	64532..64588	Peak	64556	57	0.1341060897	0.4466593421
NC_009333	64735..64779	Peak	64758	45	0.0115160509	0.4954058619
NC_009333	64870..64919	Peak	64896	50	0.1786132217	0.429120706
NC_009333	64972..64982	Peak	64976	11	3.533E-3	0.4985906091
NC_009333	65058..65121	Peak	65080	64	0.1341060897	0.4466593421
NC_009333	65296..65326	Peak	65320	31	0.0442850419	0.4823385974
NC_009333	65495..65556	Peak	65534	62	0.1034257783	0.4588125268
NC_009333	65613..65668	Peak	65637	56	0.2147509016	0.4149807673
NC_009333	65727..65728	Peak	65727	2	0.0209433678	0.4916454158
NC_009333	65952..65961	Peak	65953	10	0.0172439792	0.4931209885
NC_009333	66087..66132	Peak	66101	46	0.0689598711	0.4725107808
NC_009333	66201..66259	Peak	66219	59	0.30177508	0.3814117645
NC_009333	66332..66382	Peak	66359	51	0.1899274728	0.4246829821
NC_009333	66622..66646	Peak	66645	25	0.0115160509	0.4954058619
NC_009333	66822..66867	Peak	66840	46	0.0115160509	0.4954058619
NC_009333	66941..66996	Peak	66976	56	0.0115160509	0.4954058619
NC_009333	67102..67149	Peak	67113	48	0.071545485	0.4714818127
NC_009333	67188..67245	Peak	67222	58	0.1024491458	0.4592000881
NC_009333	67408..67457	Peak	67432	50	0.3147011852	0.3764942722
NC_009333	67582..67626	Peak	67621	45	0.0115160509	0.4954058619
NC_009333	67689..67696	Peak	67692	8	3.761E-3	0.4984996139
NC_009333	67792..67826	Peak	67792	35	0.0115160509	0.4954058619
NC_009333	67898..67935	Peak	67916	38	0.0115160509	0.4954058619
NC_009333	68045..68053	Peak	68046	9	1.12E-3	0.4995532241
NC_009333	68137..68176	Peak	68145	40	0.0526553527	0.4790032565
NC_009333	68350..68395	Peak	68368	46	0.6143152151	0.2695035251
NC_009333	68539..68595	Peak	68563	57	0.2386651843	0.4056826078
NC_009333	68875..68890	Peak	68888	16	0.0346631326	0.4861741796
NC_009333	68951..69002	Peak	68970	52	0.3019045241	0.3813624234
NC_009333	69034..69084	Peak	69055	51	0.0975541971	0.4611431482
NC_009333	69157..69175	Peak	69166	19	0.0236471188	0.4905670436
NC_009333	69232..69250	Peak	69247	19	0.0512541894	0.4795614858
NC_009333	69372..69377	Peak	69375	6	0.0139893128	0.4944192537
NC_009333	69485..69538	Peak	69508	54	0.647208453	0.2587485206
NC_009333	69675..69731	Peak	69698	57	0.1175391488	0.4532164114
NC_009333	69759..69820	Peak	69782	62	0.1239138411	0.4506917469
NC_009333	69964..69986	Peak	69972	23	0.0115160509	0.4954058619
NC_009333	70091..70093	Peak	70091	3	4.621E-3	0.4981564386
NC_009333	70229..70277	Peak	70255	49	0.1879284988	0.425466351
NC_009333	70467..70521	Peak	70491	55	0.1562975104	0.4378992593
NC_009333	70537..70585	Peak	70550	49	0.1682592978	0.4331896464
NC_009333	70667..70716	Peak	70683	50	0.06048063	0.4758864213
NC_009333	70935..70986	Peak	70956	52	0.4317180045	0.3329731901
NC_009333	71074..71082	Peak	71075	9	1.12E-3	0.4995532241
NC_009333	71225..71261	Peak	71241	37	0.0644372642	0.4743110296
NC_009333	71420..71470	Peak	71438	51	0.0989388272	0.4605934203
NC_009333	71515..71560	Peak	71515	46	0.0271760813	0.4891596465
NC_009333	71726..71767	Peak	71748	42	0.1058566966	0.457848026
NC_009333	71851..71861	Peak	71859	11	0.0115160509	0.4954058619
NC_009333	71989..71997	Peak	71992	9	0.0119388213	0.4952372126
NC_009333	72146..72209	Peak	72169	64	0.0115160509	0.4954058619
NC_009333	72281..72310	Peak	72309	30	0.0115160509	0.4954058619
NC_009333	72374..72381	Peak	72377	8	3.761E-3	0.4984996139
NC_009333	72545..72571	Peak	72571	27	0.0236471188	0.4905670436
NC_009333	72628..72687	Peak	72652	60	0.085379537	0.4659798304
NC_009333	72863..72904	Peak	72885	42	0.2773283263	0.3907640055
NC_009333	73017..73020	Peak	73017	4	7.088E-3	0.4971723557
NC_009333	73086..73134	Peak	73094	49	0.103627351	0.4587325408
NC_009333	73225..73270	Peak	73247	46	0.0115160509	0.4954058619
NC_009333	73285..73336	Peak	73319	52	0.0115160509	0.4954058619
NC_009333	73402..73455	Peak	73423	54	0.119782722	0.4523276346
NC_009333	73500..73520	Peak	73500	21	0.0265308414	0.4894169672
NC_009333	73579..73586	Peak	73582	8	3.761E-3	0.4984996139
NC_009333	73689..73721	Peak	73697	33	0.0115160509	0.4954058619
NC_009333	73841..73865	Peak	73864	25	0.0115160509	0.4954058619
NC_009333	73924..73931	Peak	73927	8	3.761E-3	0.4984996139
NC_009333	74054..74073	Peak	74066	20	0.0115160509	0.4954058619
NC_009333	74184..74240	Peak	74208	57	0.5102966695	0.3049218178
NC_009333	74292..74301	Peak	74293	10	0.0504496409	0.4798820395
NC_009333	74402..74439	Peak	74426	38	0.0115160509	0.4954058619
NC_009333	74534..74586	Peak	74574	53	0.0115160509	0.4954058619
NC_009333	74796..74802	Peak	74802	7	0.0396630542	0.4841808785
NC_009333	74978..75034	Peak	75002	57	0.2349316064	0.4071309088
NC_009333	75221..75278	Peak	75242	58	0.1156786027	0.4539536325
NC_009333	75317..75363	Peak	75357	47	0.1232841695	0.450941038
NC_009333	75404..75418	Peak	75413	15	9.187E-3	0.4963350974
NC_009333	75524..75574	Peak	75548	51	0.3940722397	0.3467638528
NC_009333	75708..75759	Peak	75732	52	0.3036757871	0.3806874532
NC_009333	75913..75977	Peak	75937	65	0.1008788116	0.4598233316
NC_009333	75977..76020	Peak	75988	44	0.1090346345	0.4565875098
NC_009333	76212..76220	Peak	76213	9	1.12E-3	0.4995532241
NC_009333	76286..76350	Peak	76309	65	0.1341060897	0.4466593421
NC_009333	76402..76461	Peak	76442	60	0.1699400822	0.4325286293
NC_009333	76567..76572	Peak	76571	6	0.0115160509	0.4954058619
NC_009333	76686..76732	Peak	76707	47	0.2059581182	0.4184118134
NC_009333	76782..76833	Peak	76810	52	0.4500571056	0.3263346324
NC_009333	77029..77081	Peak	77053	53	0.1973945598	0.4217593933
NC_009333	77373..77378	Peak	77375	6	9.669E-3	0.4961428582
NC_009333	77453..77498	Peak	77474	46	0.2710249316	0.3931859285
NC_009333	77567..77579	Peak	77572	13	0.0120559632	0.4951904831
NC_009333	77719..77775	Peak	77736	57	0.103627351	0.4587325408
NC_009333	77872..77920	Peak	77886	49	0.1140382186	0.4546037485
NC_009333	78001..78009	Peak	78004	9	0.0115160509	0.4954058619
NC_009333	78103..78111	Peak	78104	9	1.12E-3	0.4995532241
NC_009333	78205..78219	Peak	78219	15	0.0121686914	0.4951455143
NC_009333	78511..78562	Peak	78535	52	0.2950589462	0.3839744252
NC_009333	78797..78843	Peak	78817	47	0.1373843553	0.4453634982
NC_009333	78991..79023	Peak	79006	33	0.0115160509	0.4954058619
NC_009333	79113..79169	Peak	79137	57	0.1341060897	0.4466593421
NC_009333	79311..79319	Peak	79312	9	1.12E-3	0.4995532241
NC_009333	79442..79450	Peak	79443	9	0.0115160509	0.4954058619
NC_009333	79548..79596	Peak	79572	49	0.1341060897	0.4466593421
NC_009333	79620..79676	Peak	79644	57	0.1421789449	0.4434693312
NC_009333	79814..79826	Peak	79825	13	0.0115160509	0.4954058619
NC_009333	79893..79909	Peak	79909	17	0.0104653257	0.4958250153
NC_009333	79969..80009	Peak	79994	41	0.0839423807	0.4665511217
NC_009333	80071..80115	Peak	80102	45	0.1921451903	0.4238142388
NC_009333	80221..80273	Peak	80250	53	0.2731028127	0.3923870923
NC_009333	80334..80384	Peak	80349	51	0.1777396701	0.4294637145
NC_009333	80449..80495	Peak	80449	47	0.0203534369	0.4918807141
NC_009333	80537..80590	Peak	80570	54	0.0115160509	0.4954058619
NC_009333	80696..80726	Peak	80726	31	0.0186358006	0.4925658215
NC_009333	80809..80815	Peak	80811	7	0.0217417539	0.4913269784
NC_009333	80938..80968	Peak	80959	31	0.0604983645	0.4758793592
NC_009333	81062..81112	Peak	81084	51	0.1450456303	0.4423374225
NC_009333	81140..81197	Peak	81164	58	0.3073898681	0.3792733196
NC_009333	81307..81358	Peak	81327	52	0.1994539591	0.4209538275
NC_009333	81487..81513	Peak	81494	27	0.0115160509	0.4954058619
NC_009333	81624..81677	Peak	81644	54	0.2992378737	0.3823792767
NC_009333	81884..81935	Peak	81903	52	0.3821097063	0.3511899963
NC_009333	82181..82204	Peak	82203	24	0.0115160509	0.4954058619
NC_009333	82436..82452	Peak	82449	17	0.0115160509	0.4954058619
NC_009333	82565..82620	Peak	82589	56	0.1019767787	0.4593875534
NC_009333	82760..82818	Peak	82796	59	0.0115160509	0.4954058619
NC_009333	82866..82903	Peak	82903	38	0.0115160509	0.4954058619
NC_009333	83122..83129	Peak	83124	8	0.0115160509	0.4954058619
NC_009333	83163..83219	Peak	83197	57	0.0833786702	0.4667752241
NC_009333	83392..83439	Peak	83413	48	0.1111206802	0.4557603249
NC_009333	83479..83506	Peak	83497	28	0.018721434	0.4925316647
NC_009333	83543..83584	Peak	83549	42	0.0576641944	0.4770080575
NC_009333	83622..83661	Peak	83647	40	0.1184445434	0.4528577168
NC_009333	83723..83775	Peak	83758	53	0.13200565	0.4474899114
NC_009333	83931..83983	Peak	83955	53	0.3718904606	0.354987204
NC_009333	84166..84221	Peak	84198	56	0.1256679591	0.4499973829
NC_009333	84263..84312	Peak	84287	50	0.228671679	0.4095620542
NC_009333	84502..84559	Peak	84519	58	0.103627351	0.4587325408
NC_009333	84638..84645	Peak	84641	8	3.761E-3	0.4984996139
NC_009333	84717..84764	Peak	84741	48	0.2302899149	0.4089332484
NC_009333	84871..84919	Peak	84888	49	0.103627351	0.4587325408
NC_009333	85115..85150	Peak	85133	36	0.0115160509	0.4954058619
NC_009333	85224..85283	Peak	85248	60	0.0758395952	0.4697733572
NC_009333	85359..85422	Peak	85405	64	0.1341060897	0.4466593421
NC_009333	85504..85517	Peak	85510	14	0.0415413954	0.4834321463
NC_009333	85635..85684	Peak	85653	50	0.4796091815	0.3157526582
NC_009333	85791..85823	Peak	85812	33	0.1061176371	0.4577445089
NC_009333	85924..85979	Peak	85933	56	0.04590571	0.4816927015
NC_009333	85993..86057	Peak	86017	65	0.1932518296	0.4233808748
NC_009333	86177..86237	Peak	86214	61	0.2304670777	0.4088644216
NC_009333	86447..86467	Peak	86454	21	0.0588653781	0.4765296672
NC_009333	86579..86627	Peak	86611	49	0.0760056738	0.4697072921
NC_009333	86671..86733	Peak	86695	63	0.0924787999	0.4631588171
NC_009333	87106..87163	Peak	87124	58	0.0115160509	0.4954058619
NC_009333	87198..87230	Peak	87220	33	0.0115160509	0.4954058619
NC_009333	87380..87400	Peak	87391	21	0.0115160509	0.4954058619
NC_009333	87538..87546	Peak	87539	9	1.12E-3	0.4995532241
NC_009333	87627..87675	Peak	87646	49	0.0115160509	0.4954058619
NC_009333	87789..87809	Peak	87807	21	0.0115160509	0.4954058619
NC_009333	87871..87878	Peak	87874	8	3.761E-3	0.4984996139
NC_009333	87977..88033	Peak	87998	57	0.0909203785	0.4637779288
NC_009333	88143..88175	Peak	88155	33	0.0115160509	0.4954058619
NC_009333	88246..88297	Peak	88257	52	0.0115160509	0.4954058619
NC_009333	88313..88363	Peak	88353	51	0.0236471188	0.4905670436
NC_009333	88453..88499	Peak	88466	47	0.1305363254	0.4480710582
NC_009333	88554..88597	Peak	88577	44	0.1095966647	0.456364628
NC_009333	88801..88849	Peak	88839	49	0.0236471188	0.4905670436
NC_009333	88927..88972	Peak	88945	46	0.2171815197	0.4140334431
NC_009333	89152..89185	Peak	89178	34	0.0489075831	0.4804964728
NC_009333	89373..89388	Peak	89373	16	0.0186576286	0.4925571149
NC_009333	89465..89517	Peak	89476	53	0.1012512538	0.4596755055
NC_009333	89604..89660	Peak	89625	57	0.2133317008	0.4155341245
NC_009333	89926..89949	Peak	89937	24	0.103802048	0.4586632206
NC_009333	90090..90128	Peak	90116	39	0.0887499883	0.4646403022
NC_009333	90262..90302	Peak	90284	41	0.0115160509	0.4954058619
NC_009333	90620..90676	Peak	90641	57	0.115102104	0.4541820961
NC_009333	90749..90781	Peak	90778	33	0.0115160509	0.4954058619
NC_009333	90814..90847	Peak	90840	34	0.0115160509	0.4954058619
NC_009333	90941..90980	Peak	90953	40	0.5500660018	0.2911370523
NC_009333	91305..91360	Peak	91351	56	0.083572419	0.4666981983
NC_009333	91440..91479	Peak	91456	40	0.0696638606	0.4722306035
NC_009333	91568..91578	Peak	91574	11	0.0510035209	0.4796613575
NC_009333	91655..91668	Peak	91658	14	0.0369320938	0.485269575
NC_009333	91749	Peak	91749	1	5.869E-4	0.4997658503
NC_009333	91925..91972	Peak	91946	48	0.1947887355	0.4227791706
NC_009333	92070..92119	Peak	92096	50	0.3365504337	0.3682279133
NC_009333	92273..92307	Peak	92282	35	0.0407394073	0.4837518226
NC_009333	92386..92430	Peak	92399	45	0.0115160509	0.4954058619
NC_009333	92442..92475	Peak	92457	34	0.0115160509	0.4954058619
NC_009333	92502..92506	Peak	92505	5	0.0115160509	0.4954058619
NC_009333	92556..92604	Peak	92581	49	0.2451143101	0.4031839615
NC_009333	92762..92802	Peak	92771	41	0.1018681554	0.4594306634
NC_009333	92881..92931	Peak	92908	51	0.2417554849	0.4044848169
NC_009333	93030..93043	Peak	93041	14	0.0115160509	0.4954058619
NC_009333	93121..93160	Peak	93135	40	0.1521250399	0.4395441575
NC_009333	93420..93475	Peak	93444	56	0.2412194202	0.4046925301
NC_009333	93527..93549	Peak	93527	23	0.0343756105	0.486288816
NC_009333	93599..93625	Peak	93603	27	0.0115160509	0.4954058619
NC_009333	93680..93696	Peak	93687	17	0.0236471188	0.4905670436
NC_009333	93747..93797	Peak	93782	51	0.548477979	0.2916818729
NC_009333	93846..93898	Peak	93870	53	1.104956269	0.1345892693
NC_009333	94035..94038	Peak	94038	4	0.0115160509	0.4954058619
NC_009333	94123..94171	Peak	94150	49	0.1006069033	0.4599312582
NC_009333	94226..94261	Peak	94247	36	0.0590612442	0.4764516637
NC_009333	94432..94459	Peak	94440	28	0.0739564986	0.4705224997
NC_009333	94567..94592	Peak	94584	26	0.0799414881	0.4681418963
NC_009333	94709..94717	Peak	94710	9	1.12E-3	0.4995532241
NC_009333	94802..94824	Peak	94806	23	0.0115160509	0.4954058619
NC_009333	94904..94933	Peak	94924	30	0.0115160509	0.4954058619
NC_009333	95014..95050	Peak	95034	37	0.0115160509	0.4954058619
NC_009333	95124..95188	Peak	95148	65	0.186267645	0.4261174395
NC_009333	95273..95289	Peak	95284	17	0.0115160509	0.4954058619
NC_009333	95562..95596	Peak	95564	35	0.0694372476	0.4723207906
NC_009333	95646..95711	Peak	95670	66	0.1341060897	0.4466593421
NC_009333	95808..95872	Peak	95832	65	0.1174256886	0.4532613642
NC_009333	95920..95933	Peak	95920	14	0.023159877	0.4907613717
NC_009333	95982..96030	Peak	96006	49	0.1341060897	0.4466593421
NC_009333	96277..96321	Peak	96309	45	0.1148597761	0.454278134
NC_009333	96387..96405	Peak	96387	19	0.0132837632	0.4947007011
NC_009333	96496..96504	Peak	96497	9	1.12E-3	0.4995532241
NC_009333	96586..96601	Peak	96599	16	0.0115160509	0.4954058619
NC_009333	96735..96798	Peak	96759	64	0.1258299233	0.4499332773
NC_009333	96863..96870	Peak	96869	8	0.0562630444	0.4775661293
NC_009333	97000..97022	Peak	97005	23	0.0424541673	0.483068324
NC_009333	97162..97179	Peak	97164	18	0.0115160509	0.4954058619
NC_009333	97262..97265	Peak	97265	4	3.761E-3	0.4984996139
NC_009333	97414..97435	Peak	97427	22	0.0847749209	0.466220166
NC_009333	97495..97499	Peak	97496	5	6.872E-3	0.497258304
NC_009333	97568..97578	Peak	97574	11	0.0604348116	0.4759046668
NC_009333	97716..97727	Peak	97720	12	0.031462688	0.487450274
NC_009333	97828..97870	Peak	97840	43	0.0115160509	0.4954058619
NC_009333	97951..97973	Peak	97964	23	0.0115160509	0.4954058619
NC_009333	98397..98436	Peak	98421	40	0.0927537072	0.4630496143
NC_009333	98575..98620	Peak	98596	46	0.0909203785	0.4637779288
NC_009333	98679..98729	Peak	98702	51	0.1324717713	0.4473055747
NC_009333	98806..98844	Peak	98807	39	0.0115160509	0.4954058619
NC_009333	98883..98900	Peak	98894	18	0.0115160509	0.4954058619
NC_009333	98969..99011	Peak	98987	43	0.1810940153	0.428146891
NC_009333	99077..99090	Peak	99080	14	0.0723678124	0.4711545998
NC_009333	99153..99171	Peak	99165	19	0.0293667564	0.488286043
NC_009333	99308..99361	Peak	99332	54	0.3977873854	0.3453934583
NC_009333	99455..99483	Peak	99467	29	0.0825620587	0.4670998855
NC_009333	99541..99548	Peak	99542	8	0.0411018862	0.4836073355
NC_009333	99633..99641	Peak	99634	9	1.12E-3	0.4995532241
NC_009333	99718..99732	Peak	99719	15	0.0115160509	0.4954058619
NC_009333	99796..99803	Peak	99799	8	3.761E-3	0.4984996139
NC_009333	99973..100029	Peak	99997	57	0.1341060897	0.4466593421
NC_009333	100380..100436	Peak	100404	57	0.1341060897	0.4466593421
NC_009333	100585..100629	Peak	100617	45	0.0988351647	0.4606345739
NC_009333	100654..100706	Peak	100685	53	0.1058309547	0.4578582382
NC_009333	100843..100905	Peak	100864	63	0.1341060897	0.4466593421
NC_009333	101145..101167	Peak	101167	23	0.0115160509	0.4954058619
NC_009333	101244..101252	Peak	101245	9	1.12E-3	0.4995532241
NC_009333	101335..101343	Peak	101340	9	0.0115160509	0.4954058619
NC_009333	101428..101478	Peak	101452	51	0.5731404102	0.283274814
NC_009333	101596..101643	Peak	101609	48	0.0680432373	0.4728756078
NC_009333	101700..101703	Peak	101702	4	0.0115160509	0.4954058619
NC_009333	101784..101845	Peak	101808	62	0.1009387543	0.4597995394
NC_009333	101981..102022	Peak	101990	42	0.0115160509	0.4954058619
NC_009333	102135..102188	Peak	102158	54	0.1599209288	0.436471681
NC_009333	102321..102365	Peak	102331	45	0.1336108402	0.4468551559
NC_009333	102521..102555	Peak	102537	35	0.1607669934	0.4361384612
NC_009333	102645..102691	Peak	102646	47	0.0115160509	0.4954058619
NC_009333	102711..102764	Peak	102728	54	0.0115160509	0.4954058619
NC_009333	102976..103024	Peak	103007	49	0.2060805767	0.4183639853
NC_009333	103078..103129	Peak	103102	52	0.1412258394	0.4438457669
NC_009333	103295..103302	Peak	103298	8	3.761E-3	0.4984996139
NC_009333	103561..103597	Peak	103578	37	0.0115160509	0.4954058619
NC_009333	103739..103788	Peak	103763	50	0.214198018	0.4151963208
NC_009333	103935..103989	Peak	103959	55	0.3217316237	0.3738280092
NC_009333	104060..104091	Peak	104060	32	0.019763506	0.4921160151
NC_009333	104133..104195	Peak	104157	63	0.1341060897	0.4466593421
NC_009333	104252..104300	Peak	104269	49	0.103627351	0.4587325408
NC_009333	104394..104417	Peak	104410	24	5.515E-3	0.4977997721
NC_009333	104571..104599	Peak	104593	29	0.0686872142	0.4726192979
NC_009333	104659..104695	Peak	104666	37	0.0983071421	0.4608442036
NC_009333	104822..104858	Peak	104823	37	0.0115160509	0.4954058619
NC_009333	104891..104928	Peak	104906	38	0.0115160509	0.4954058619
NC_009333	105027..105055	Peak	105028	29	0.0115160509	0.4954058619
NC_009333	105125..105164	Peak	105144	40	0.0115160509	0.4954058619
NC_009333	105285..105293	Peak	105286	9	1.12E-3	0.4995532241
NC_009333	105376..105414	Peak	105389	39	0.0115160509	0.4954058619
NC_009333	105438..105502	Peak	105483	65	0.0115160509	0.4954058619
NC_009333	105574..105592	Peak	105579	19	0.0115160509	0.4954058619
NC_009333	105718..105742	Peak	105730	25	0.0115160509	0.4954058619
NC_009333	105781..105814	Peak	105805	34	0.0115160509	0.4954058619
NC_009333	106020..106070	Peak	106044	51	0.1341060897	0.4466593421
NC_009333	106134..106181	Peak	106155	48	0.1103175325	0.4560787766
NC_009333	106232..106284	Peak	106249	53	0.1245294209	0.4504480536
NC_009333	106360..106367	Peak	106364	8	0.0115160509	0.4954058619
NC_009333	106517..106560	Peak	106540	44	0.2214807051	0.4123590793
NC_009333	106829..106837	Peak	106830	9	0.0115160509	0.4954058619
NC_009333	106947..107001	Peak	106964	55	0.103627351	0.4587325408
NC_009333	107196..107250	Peak	107213	55	0.103627351	0.4587325408
NC_009333	107404..107442	Peak	107419	39	0.1850624702	0.4265900188
NC_009333	107487..107532	Peak	107502	46	0.0884374625	0.4647644936
NC_009333	107609..107616	Peak	107612	8	3.761E-3	0.4984996139
NC_009333	107712..107713	Peak	107712	2	0.0115160509	0.4954058619
NC_009333	107933..107981	Peak	107962	49	0.0115160509	0.4954058619
NC_009333	108011..108075	Peak	108032	65	0.0115160509	0.4954058619
NC_009333	108281..108310	Peak	108300	30	0.0236471188	0.4905670436
NC_009333	108357..108407	Peak	108384	51	0.1975283664	0.4217070428
NC_009333	108504..108542	Peak	108525	39	0.0115160509	0.4954058619
NC_009333	108626..108669	Peak	108643	44	0.0115160509	0.4954058619
NC_009333	108773..108780	Peak	108776	8	3.761E-3	0.4984996139
NC_009333	108850..108899	Peak	108876	50	0.1108305335	0.4558753661
NC_009333	109014..109033	Peak	109022	20	0.0506286442	0.4798107187
NC_009333	109142..109170	Peak	109161	29	0.0115160509	0.4954058619
NC_009333	109187..109248	Peak	109226	62	0.0115160509	0.4954058619
NC_009333	109300..109328	Peak	109319	29	0.0115160509	0.4954058619
NC_009333	109470..109516	Peak	109505	47	0.074510965	0.4703019083
NC_009333	109590..109651	Peak	109614	62	0.2319524682	0.4082874659
NC_009333	109873..109941	Peak	109897	69	0.0115160509	0.4954058619
NC_009333	110041..110077	Peak	110063	37	0.0115160509	0.4954058619
NC_009333	110110..110141	Peak	110140	32	0.0115160509	0.4954058619
NC_009333	110346..110397	Peak	110352	52	0.0115160509	0.4954058619
NC_009333	110490..110546	Peak	110514	57	0.1199525991	0.4522603486
NC_009333	110752..110794	Peak	110783	43	0.0816736267	0.4674531256
NC_009333	110989..111043	Peak	111006	55	0.103627351	0.4587325408
NC_009333	111138..111188	Peak	111165	51	0.0115160509	0.4954058619
NC_009333	111204..111254	Peak	111225	51	0.0115160509	0.4954058619
NC_009333	111254..111319	Peak	111297	66	0.0115160509	0.4954058619
NC_009333	111371..111395	Peak	111375	25	0.0115160509	0.4954058619
NC_009333	111462..111521	Peak	111483	60	0.0115160509	0.4954058619
NC_009333	111593..111623	Peak	111611	31	0.0115160509	0.4954058619
NC_009333	111723..111769	Peak	111764	47	0.0115160509	0.4954058619
NC_009333	111880..111902	Peak	111888	23	0.0893201405	0.4644137441
NC_009333	112025..112073	Peak	112037	49	0.0717621937	0.4713955801
NC_009333	112285..112301	Peak	112290	17	0.0115160509	0.4954058619
NC_009333	112360..112367	Peak	112363	8	3.761E-3	0.4984996139
NC_009333	112466..112469	Peak	112468	4	0.0115160509	0.4954058619
NC_009333	112691..112699	Peak	112692	9	1.12E-3	0.4995532241
NC_009333	112779..112797	Peak	112790	19	0.0115160509	0.4954058619
NC_009333	112868..112912	Peak	112886	45	0.3774791	0.3529087967
NC_009333	113068..113107	Peak	113090	40	0.0115160509	0.4954058619
NC_009333	113174..113181	Peak	113177	8	3.761E-3	0.4984996139
NC_009333	113291..113304	Peak	113303	14	0.0115160509	0.4954058619
NC_009333	113364..113371	Peak	113367	8	3.761E-3	0.4984996139
NC_009333	113467..113524	Peak	113480	58	0.0115160509	0.4954058619
NC_009333	113586..113605	Peak	113597	20	0.0115160509	0.4954058619
NC_009333	113947..113967	Peak	113964	21	0.0115160509	0.4954058619
NC_009333	114042..114073	Peak	114054	32	0.0525582572	0.4790419385
NC_009333	114177..114242	Peak	114201	66	0.1341060897	0.4466593421
NC_009333	114394..114451	Peak	114418	58	0.2180096865	0.4137107821
NC_009333	114560..114603	Peak	114583	44	0.0115160509	0.4954058619
NC_009333	114700..114737	Peak	114735	38	0.0115160509	0.4954058619
NC_009333	114839..114884	Peak	114860	46	0.116167024	0.4537600854
NC_009333	115105..115112	Peak	115108	8	3.761E-3	0.4984996139
NC_009333	115195..115248	Peak	115218	54	0.2673149667	0.3946133321
NC_009333	115332..115338	Peak	115337	7	0.0285943219	0.4885940703
NC_009333	115435..115458	Peak	115446	24	0.0558115467	0.4777459682
NC_009333	115675..115723	Peak	115685	49	0.0115160509	0.4954058619
NC_009333	115849..115882	Peak	115853	34	0.0115160509	0.4954058619
NC_009333	115918..116001	Peak	115943	84	0.0115160509	0.4954058619
NC_009333	116030..116093	Peak	116047	64	0.0115160509	0.4954058619
NC_009333	116213..116259	Peak	116233	47	0.1103175325	0.4560787766
NC_009333	116345..116395	Peak	116366	51	0.2171815356	0.4140334369
NC_009333	116466..116481	Peak	116466	16	0.0179937133	0.4928219343
NC_009333	116591..116637	Peak	116606	47	0.0139799676	0.4944229815
NC_009333	116647..116703	Peak	116670	57	0.097327601	0.4612331188
NC_009333	116783..116791	Peak	116784	9	1.12E-3	0.4995532241
NC_009333	116874..116882	Peak	116875	9	0.0115160509	0.4954058619
NC_009333	117044..117103	Peak	117066	60	0.1111459598	0.4557503019
NC_009333	117151..117162	Peak	117154	12	0.0101491585	0.4959511411
NC_009333	117202..117242	Peak	117230	41	0.0546172941	0.4782216803
NC_009333	117379..117421	Peak	117420	43	0.0115160509	0.4954058619
NC_009333	117524..117567	Peak	117543	44	0.5565440058	0.2889195101
NC_009333	117744..117754	Peak	117744	11	0.013466143	0.4946279485
NC_009333	117821..117855	Peak	117827	35	0.0115160509	0.4954058619
NC_009333	117876..117897	Peak	117897	22	0.0303238748	0.487904378
NC_009333	117954..118011	Peak	117978	58	0.2579981699	0.3982041598
NC_009333	118130	Peak	118130	1	5.869E-4	0.4997658503
NC_009333	118198..118240	Peak	118223	43	0.204512599	0.4189764737
NC_009333	118484..118541	Peak	118522	58	0.0115160509	0.4954058619
NC_009333	118648..118677	Peak	118669	30	0.0115160509	0.4954058619
NC_009333	118739..118803	Peak	118780	65	0.0115160509	0.4954058619
NC_009333	118885..118936	Peak	118928	52	0.0115160509	0.4954058619
NC_009333	119013..119021	Peak	119014	9	1.12E-3	0.4995532241
NC_009333	119098..119105	Peak	119099	8	0.0115160509	0.4954058619
NC_009333	119186..119194	Peak	119187	9	1.12E-3	0.4995532241
NC_009333	119355..119414	Peak	119376	60	0.2146277987	0.4150287594
NC_009333	119492..119536	Peak	119502	45	0.0915775678	0.4635168374
NC_009333	119553..119579	Peak	119568	27	0.079141703	0.4684599567
NC_009333	119659..119712	Peak	119680	54	2.1479188956	0.0158600995
NC_009333	119820..119830	Peak	119822	11	0.0115160509	0.4954058619
NC_009333	119830..119876	Peak	119874	47	0.0115160509	0.4954058619
NC_009333	119958..119963	Peak	119959	6	1.12E-3	0.4995532241
NC_009333	120043..120048	Peak	120043	6	9.454E-4	0.4996228449
NC_009333	120140..120186	Peak	120145	47	0.0115160509	0.4954058619
NC_009333	120212..120249	Peak	120247	38	0.0115160509	0.4954058619
NC_009333	120352..120408	Peak	120376	57	0.2418499301	0.4044482242
NC_009333	120519..120573	Peak	120556	55	0.0115160509	0.4954058619
NC_009333	120678..120726	Peak	120692	49	0.0115160509	0.4954058619
NC_009333	120811..120813	Peak	120812	3	0.0115160509	0.4954058619
NC_009333	120875..120894	Peak	120882	20	0.0236471188	0.4905670436
NC_009333	120958..120972	Peak	120966	15	0.0849430946	0.4661533155
NC_009333	121032..121046	Peak	121045	15	0.0551700605	0.4780014904
NC_009333	121120..121167	Peak	121153	48	0.307221455	0.379337408
NC_009333	121314..121354	Peak	121327	41	0.0831263019	0.4668755562
NC_009333	121433..121445	Peak	121433	13	0.0179937133	0.4928219343
NC_009333	121548..121556	Peak	121549	9	1.12E-3	0.4995532241
NC_009333	121666..121707	Peak	121683	42	0.2178806381	0.4137610566
NC_009333	121783..121791	Peak	121784	9	1.12E-3	0.4995532241
NC_009333	121868..121873	Peak	121873	6	0.0190717597	0.4923919299
NC_009333	121942..121990	Peak	121959	49	0.3153792834	0.3762368471
NC_009333	122122..122158	Peak	122156	37	0.0115160509	0.4954058619
NC_009333	122466..122474	Peak	122467	9	1.12E-3	0.4995532241
NC_009333	122581..122631	Peak	122612	51	0.3454804631	0.3648665977
NC_009333	122806..122854	Peak	122831	49	0.2207504702	0.4126433656
NC_009333	122981..123040	Peak	123000	60	0.5549822707	0.2894533936
NC_009333	123141..123189	Peak	123161	49	0.0115160509	0.4954058619
NC_009333	123288..123340	Peak	123305	53	0.0920556214	0.4633269238
NC_009333	123407..123452	Peak	123447	46	0.0262604688	0.4895247927
NC_009333	123518..123524	Peak	123524	7	6.807E-3	0.4972842421
NC_009333	123712..123732	Peak	123717	21	0.0791247326	0.4684667057
NC_009333	123824..123873	Peak	123841	50	0.1136608574	0.4547533213
NC_009333	124012..124056	Peak	124030	45	0.5265309324	0.299259683
NC_009333	124111..124128	Peak	124118	18	0.0700737911	0.4720674635
NC_009333	124201..124251	Peak	124225	51	0.1830163245	0.4273926049
NC_009333	124408..124451	Peak	124424	44	0.1195109208	0.4524352943
NC_009333	124632..124688	Peak	124656	57	0.2396118788	0.4053155775
NC_009333	124799..124812	Peak	124810	14	0.1705285313	0.4322972491
NC_009333	124887..124926	Peak	124903	40	0.4154559175	0.3389040897
NC_009333	125170..125201	Peak	125199	32	0.1093362936	0.4564678805
NC_009333	125512..125564	Peak	125536	53	0.1140817706	0.4545864864
NC_009333	125804..125848	Peak	125838	45	0.0115160509	0.4954058619
NC_009333	125904..125960	Peak	125941	57	0.0115160509	0.4954058619
NC_009333	126077..126099	Peak	126092	23	0.0115160509	0.4954058619
NC_009333	126263..126314	Peak	126287	52	3.0926798092	9.918E-4
NC_009333	126417..126466	Peak	126443	50	1.2010152356	0.1148726457
NC_009333	126544..126577	Peak	126558	34	0.084931602	0.4661578839
NC_009333	126626..126628	Peak	126626	3	0.0110740455	0.4955821853
NC_009333	126757..126818	Peak	126781	62	0.1446439244	0.4424960076
NC_009333	126997..127002	Peak	126998	6	1.12E-3	0.4995532241
NC_009333	127072..127127	Peak	127090	56	0.2058629856	0.4184489697
NC_009333	127238..127283	Peak	127275	46	0.1008954475	0.4598167285
NC_009333	127345..127348	Peak	127347	4	1.788E-3	0.4992866209
NC_009333	127479..127526	Peak	127510	48	0.0827555164	0.4670229703
NC_009333	127614..127624	Peak	127618	11	0.0337782622	0.4865269852
NC_009333	127819..127878	Peak	127843	60	0.2359431296	0.4067384002
NC_009333	127951..127996	Peak	127959	46	0.1061125593	0.4577465233
NC_009333	128284..128319	Peak	128304	36	0.0115160509	0.4954058619
NC_009333	128468..128494	Peak	128486	27	0.0881692388	0.464871083
NC_009333	128579..128627	Peak	128613	49	0.1215931424	0.4516106224
NC_009333	128835..128898	Peak	128853	64	0.1177275109	0.4531417839
NC_009333	129044..129100	Peak	129068	57	0.1341060897	0.4466593421
NC_009333	129177..129212	Peak	129207	36	0.0236471188	0.4905670436
NC_009333	129306..129349	Peak	129321	44	0.1233260862	0.4509244424
NC_009333	129458..129499	Peak	129484	42	0.0634892925	0.4746884427
NC_009333	129586..129615	Peak	129614	30	0.0997973173	0.4602526189
NC_009333	129679..129733	Peak	129701	55	0.2270188022	0.4102045609
NC_009333	129865..129912	Peak	129889	48	0.851753631	0.1971754236
NC_009333	129992..130001	Peak	129994	10	5.515E-3	0.4977997721
NC_009333	130092..130100	Peak	130093	9	1.12E-3	0.4995532241
NC_009333	130177..130187	Peak	130178	11	0.0115160509	0.4954058619
NC_009333	130278..130330	Peak	130301	53	0.4442195102	0.3284419439
NC_009333	130400..130415	Peak	130401	16	0.0115160509	0.4954058619
NC_009333	130561..130576	Peak	130565	16	0.0236471188	0.4905670436
NC_009333	130628..130686	Peak	130648	59	0.3144880139	0.3765752093
NC_009333	130797..130851	Peak	130820	55	0.1019499444	0.4593982033
NC_009333	130973..130981	Peak	130974	9	1.12E-3	0.4995532241
NC_009333	131074..131094	Peak	131081	21	0.0122211529	0.4951245867
NC_009333	131145..131171	Peak	131165	27	0.0931573643	0.4628892727
NC_009333	131366..131411	Peak	131402	46	0.0115160509	0.4954058619
NC_009333	131478..131543	Peak	131513	66	0.0115160509	0.4954058619
NC_009333	131626..131634	Peak	131627	9	1.12E-3	0.4995532241
NC_009333	131731..131756	Peak	131733	26	0.0115160509	0.4954058619
NC_009333	131867..131900	Peak	131879	34	0.0115160509	0.4954058619
NC_009333	132025..132040	Peak	132027	16	0.0132509693	0.4947137828
NC_009333	132097..132150	Peak	132111	54	0.1018823532	0.4594250286
NC_009333	132244..132252	Peak	132245	9	1.12E-3	0.4995532241
NC_009333	132364..132372	Peak	132365	9	1.12E-3	0.4995532241
NC_009333	132470..132493	Peak	132491	24	0.0909203785	0.4637779288
NC_009333	132568..132576	Peak	132569	9	1.12E-3	0.4995532241
NC_009333	132655..132657	Peak	132656	3	0.0115160509	0.4954058619
NC_009333	132735..132743	Peak	132736	9	1.12E-3	0.4995532241
NC_009333	132828..132859	Peak	132846	32	0.0115160509	0.4954058619
NC_009333	132980..133028	Peak	133001	49	0.0115160509	0.4954058619
NC_009333	133050..133092	Peak	133081	43	0.0115160509	0.4954058619
NC_009333	133188..133196	Peak	133193	9	0.0115160509	0.4954058619
NC_009333	133246..133262	Peak	133257	17	0.0115160509	0.4954058619
NC_009333	133306..133334	Peak	133321	29	0.0115160509	0.4954058619
NC_009333	133452..133468	Peak	133464	17	0.0115160509	0.4954058619
NC_009333	133541..133586	Peak	133559	46	0.0967624451	0.4614575242
NC_009333	133676..133708	Peak	133697	33	0.0115160509	0.4954058619
NC_009333	133791..133798	Peak	133794	8	3.761E-3	0.4984996139
NC_009333	134006..134056	Peak	134030	51	0.0972034764	0.4612824037
NC_009333	134093..134140	Peak	134115	48	0.0980573903	0.460943361
NC_009333	134389..134453	Peak	134407	65	0.095510005	0.4619548719
NC_009333	134516..134554	Peak	134516	39	0.0279525752	0.4888499879
NC_009333	134645..134686	Peak	134669	42	0.2065000682	0.4182001557
NC_009333	134750..134816	Peak	134770	67	0.1809578412	0.4282003337
NC_009333	134891..134907	Peak	134905	17	0.0669067363	0.4733279751
NC_009333	134978..135016	Peak	134991	39	0.069344523	0.4723576934
NC_009333	135114..135154	Peak	135147	41	0.1089498691	0.4566211261
NC_009333	135278..135346	Peak	135302	69	1.1635416457	0.1223049058
NC_009333	135488..135537	Peak	135514	50	1.055535135	0.1455903246
NC_009333	135748..135759	Peak	135753	12	0.0669244186	0.4733209367
NC_009333	135937..135984	Peak	135948	48	0.1561415261	0.4379607333
NC_009333	136154..136182	Peak	136166	29	0.2012959998	0.4202335651
NC_009333	136238..136249	Peak	136244	12	0.1395697373	0.4444999764
NC_009333	136390..136436	Peak	136406	47	0.5415758992	0.2940553492
NC_009333	136606..136650	Peak	136628	45	0.3706646678	0.3554436548
NC_009333	136714..136761	Peak	136740	48	0.362700629	0.3584142649
NC_009333	136843..136893	Peak	136860	51	0.2508684747	0.4009578993
NC_009333	136941..136965	Peak	136953	25	0.2569097597	0.3986242181
NC_009333	137094..137149	Peak	137126	56	0.5419039818	0.2939423268
NC_009333	137248..137252	Peak	137248	5	3.761E-3	0.4984996139
NC_009333	137473..137525	Peak	137484	53	0.0115160509	0.4954058619
NC_009333	137644..137671	Peak	137647	28	0.0115160509	0.4954058619
NC_009333	137786..137828	Peak	137811	43	0.0115160509	0.4954058619
NC_009333	137862..137913	Peak	137876	52	0.0115160509	0.4954058619
NC_009333	137913..137939	Peak	137932	27	0.0115160509	0.4954058619
