# Supplementary material for: Epigenetic Reprogramming of Kaposi’s Sarcoma-Associated Herpesvirus during Hypoxic Reactivation
Source: Cancers (Basel). 2022 Nov 2;14(21):5396. doi: 10.3390/cancers14215396 (PMC9654037; doi:10.3390/cancers14215396)
Supplement: Supplementary file 1 [file cancers-14-05396-s001.zip › RTA Hypoxia.csv]

Chromosome	Region	Name	Center of peak	Length	Peak shape score	P-value
NC_009333	226..279	Peak	262	54	1.2698412899	0.1020705848
NC_009333	671..759	Peak	739	89	0.7172905219	0.2365974272
NC_009333	961..1049	Peak	1021	89	0.7604452945	0.2234942287
NC_009333	1337..1492	Peak	1411	156	1.368921235	0.0855119486
NC_009333	1764..1859	Peak	1784	96	0.814147011	0.2077803686
NC_009333	2418..2497	Peak	2444	80	1.4656666774	0.0713695583
NC_009333	2838..2985	Peak	2864	148	0.7451779053	0.2280820889
NC_009333	3458..3512	Peak	3488	55	0.6242259287	0.2662396105
NC_009333	4018..4062	Peak	4026	45	0.3399372801	0.3669518806
NC_009333	4378..4456	Peak	4419	79	0.255276979	0.3992545896
NC_009333	4685..4763	Peak	4739	79	2.341422823	9.605E-3
NC_009333	4932..4973	Peak	4962	42	0.5175840213	0.3023742663
NC_009333	5308..5387	Peak	5367	80	1.9289348466	0.0268694756
NC_009333	5576..5605	Peak	5583	30	0.3000161843	0.3820824054
NC_009333	6026..6118	Peak	6098	93	0.6274358465	0.2651867882
NC_009333	6829..6903	Peak	6883	75	0.2743875462	0.3918934063
NC_009333	7283..7325	Peak	7316	43	0.4438556872	0.328573462
NC_009333	7905..7950	Peak	7924	46	0.4981381717	0.3091933287
NC_009333	8215..8277	Peak	8250	63	0.6407098386	0.2608556104
NC_009333	8584..8655	Peak	8592	72	0.294929487	0.384023873
NC_009333	9076..9118	Peak	9100	43	0.2425000148	0.4041963727
NC_009333	9382..9427	Peak	9401	46	0.1200755139	0.4522116646
NC_009333	10077..10106	Peak	10100	30	0.1888784971	0.4250940235
NC_009333	10518..10544	Peak	10525	27	0.2494309966	0.4015137054
NC_009333	10779..10928	Peak	10815	150	0.6255349789	0.2658099992
NC_009333	11036..11091	Peak	11063	56	0.6700240153	0.2514212406
NC_009333	11205..11262	Peak	11240	58	0.4969235542	0.3096214804
NC_009333	11664..11678	Peak	11674	15	0.0984488997	0.4607879235
NC_009333	11915..11954	Peak	11949	40	0.2206707005	0.4126744233
NC_009333	12114..12256	Peak	12202	143	0.421716974	0.3366158067
NC_009333	12514..12576	Peak	12552	63	0.5552544081	0.2893603293
NC_009333	12929..12982	Peak	12954	54	0.5536303687	0.289915919
NC_009333	13241..13267	Peak	13249	27	0.4013038325	0.3440982211
NC_009333	13561..13586	Peak	13575	26	0.2371780486	0.4062593326
NC_009333	13795..13870	Peak	13837	76	0.438990818	0.3303340947
NC_009333	14436..14542	Peak	14496	107	0.5601499931	0.2876885665
NC_009333	14800..14870	Peak	14832	71	0.1294128447	0.4485154923
NC_009333	15042..15069	Peak	15051	28	0.2307285573	0.4087628433
NC_009333	15285..15430	Peak	15337	146	0.307379298	0.3792773419
NC_009333	15736..15885	Peak	15857	150	0.1954185624	0.422532643
NC_009333	16164..16189	Peak	16169	26	0.1616073546	0.4358075327
NC_009333	16766..16842	Peak	16801	77	0.31052734	0.378079986
NC_009333	17111..17171	Peak	17150	61	1.2270632865	0.1098994027
NC_009333	17621..17648	Peak	17633	28	0.3722986908	0.3548352366
NC_009333	18000..18016	Peak	18003	17	0.0917480605	0.4634491058
NC_009333	18386..18408	Peak	18393	23	0.2285059662	0.4096264592
NC_009333	18631..18738	Peak	18687	108	0.1997543564	0.4208363501
NC_009333	19248..19306	Peak	19267	59	0.4675885051	0.3200394434
NC_009333	19728..19769	Peak	19737	42	0.2948618869	0.384049694
NC_009333	20095..20149	Peak	20129	55	0.5623414537	0.2869417
NC_009333	20444..20497	Peak	20476	54	0.4829292685	0.3145729796
NC_009333	20712..20903	Peak	20864	192	0.3411279525	0.3665036295
NC_009333	21207..21311	Peak	21255	105	1.4424360643	0.074589698
NC_009333	21700..21747	Peak	21737	48	0.2892373005	0.3861998947
NC_009333	22212..22306	Peak	22268	95	0.1710811715	0.4320799703
NC_009333	22635..22711	Peak	22688	77	1.3609441875	0.086765664
NC_009333	23192..23234	Peak	23202	43	0.2354669833	0.406923151
NC_009333	23469..23542	Peak	23504	74	2.2447606935	0.0123917497
NC_009333	23948..23971	Peak	23956	24	1.1369393192	0.1277818268
NC_009333	24790..24838	Peak	24806	49	0.6060322177	0.2722466798
NC_009333	25377..25446	Peak	25411	70	0.7506711624	0.2264252911
NC_009333	25729..25811	Peak	25791	83	2.6644261761	3.856E-3
NC_009333	26222..26267	Peak	26242	46	1.206539077	0.1138048506
NC_009333	26630..26697	Peak	26660	68	0.3946787612	0.3465399895
NC_009333	26987..27126	Peak	27067	140	0.8361175887	0.2015443772
NC_009333	27298..27394	Peak	27355	97	0.20004158	0.4207240311
NC_009333	27637..27673	Peak	27648	37	0.4579335412	0.3235000943
NC_009333	28153..28198	Peak	28190	46	0.6221844776	0.2669102858
NC_009333	28411..28486	Peak	28469	76	0.5274969382	0.298924271
NC_009333	28620..28667	Peak	28629	48	0.542089447	0.2938784441
NC_009333	29079..29214	Peak	29201	136	0.5152762515	0.3031799959
NC_009333	29569..29636	Peak	29610	68	0.7899882505	0.2147673151
NC_009333	30039..30094	Peak	30073	56	0.4579510754	0.3234937955
NC_009333	30873..30893	Peak	30882	21	1.1180493401	0.1317729606
NC_009333	31353..31420	Peak	31395	68	0.6279232375	0.2650271138
NC_009333	31842..31937	Peak	31880	96	0.3095676061	0.3784448968
NC_009333	32256..32362	Peak	32275	107	0.5757573052	0.2823896178
NC_009333	32632..32665	Peak	32641	34	0.2056953464	0.4185144469
NC_009333	33095..33121	Peak	33103	27	0.215406535	0.4147251877
NC_009333	33387..33435	Peak	33400	49	0.4039503242	0.3431246245
NC_009333	33776..33793	Peak	33779	18	0.1085543025	0.4567780039
NC_009333	34126..34256	Peak	34229	131	0.4625304572	0.321850483
NC_009333	34432..34512	Peak	34460	81	0.2303083676	0.4089260795
NC_009333	35047..35065	Peak	35058	19	0.2482833328	0.4019575969
NC_009333	35455..35462	Peak	35459	8	0.0739368509	0.4705303167
NC_009333	35637..35661	Peak	35650	25	0.2941575866	0.3843187443
NC_009333	35950..36040	Peak	36020	91	0.3237429872	0.3730663115
NC_009333	36202..36290	Peak	36238	89	0.718355257	0.2362691337
NC_009333	36418..36483	Peak	36451	66	0.2539222734	0.3997778035
NC_009333	36999..37062	Peak	37032	64	1.0332639085	0.1507402062
NC_009333	37371..37427	Peak	37404	57	0.6138085037	0.2696709386
NC_009333	37915..37940	Peak	37923	26	0.1996046647	0.4208948896
NC_009333	38391..38469	Peak	38438	79	0.345330028	0.3649231373
NC_009333	38697..38760	Peak	38722	64	0.1294128447	0.4485154923
NC_009333	38947..39088	Peak	38965	142	0.3632584414	0.3582059175
NC_009333	39317..39367	Peak	39348	51	0.9516874371	0.1706277613
NC_009333	39771..39816	Peak	39787	46	0.4324589587	0.3327039374
NC_009333	40269..40363	Peak	40325	95	0.1710811715	0.4320799703
NC_009333	40880..40917	Peak	40909	38	0.2345376153	0.4072838173
NC_009333	41351..41406	Peak	41375	56	0.502319344	0.3077214522
NC_009333	41482..41662	Peak	41590	181	0.587775487	0.2783414998
NC_009333	42254..42325	Peak	42308	72	0.6381212042	0.2616973923
NC_009333	43110..43172	Peak	43135	63	0.500082475	0.3085085027
NC_009333	43532..43548	Peak	43542	17	0.1223521517	0.4513100656
NC_009333	44032..44117	Peak	44100	86	0.5594152987	0.2879391614
NC_009333	44304..44390	Peak	44339	87	0.2118764193	0.4161017238
NC_009333	44714..44765	Peak	44731	52	0.2231841541	0.411696092
NC_009333	45173..45207	Peak	45186	35	0.1843076326	0.4268860633
NC_009333	45450..45544	Peak	45506	95	0.1710811715	0.4320799703
NC_009333	45906..45915	Peak	45913	10	0.0369869174	0.4852477185
NC_009333	46152..46220	Peak	46192	69	0.1658950399	0.4341197755
NC_009333	46459..46529	Peak	46491	71	0.1294128447	0.4485154923
NC_009333	46879..47005	Peak	46892	127	0.3251585249	0.3725305484
NC_009333	47374..47437	Peak	47393	64	0.1789306126	0.4289960927
NC_009333	47452..47592	Peak	47565	141	0.1733663315	0.4311817439
NC_009333	47873..47887	Peak	47880	15	0.2203207616	0.412810676
NC_009333	48187..48314	Peak	48228	128	0.9770002071	0.1642845249
NC_009333	48515..48531	Peak	48518	17	0.0917480605	0.4634491058
NC_009333	48658..48728	Peak	48690	71	0.1294128447	0.4485154923
NC_009333	49016..49038	Peak	49025	23	0.2072308965	0.4179147696
NC_009333	49212..49225	Peak	49217	14	0.1106617117	0.4559423045
NC_009333	49622..49664	Peak	49632	43	0.353140576	0.3619915274
NC_009333	50293..50319	Peak	50300	27	0.348136858	0.3638687025
NC_009333	50743..50825	Peak	50779	83	0.3730220625	0.3545660118
NC_009333	51455..51495	Peak	51476	41	0.8414657543	0.2000435311
NC_009333	51671..51749	Peak	51711	79	0.1710811715	0.4320799703
NC_009333	52228..52364	Peak	52292	137	0.2385785	0.4057162191
NC_009333	52561..52580	Peak	52567	20	0.1696951203	0.4326249559
NC_009333	52729..52750	Peak	52742	22	0.3942698895	0.3466908956
NC_009333	53146..53238	Peak	53189	93	0.343830757	0.3654867841
NC_009333	53531..53686	Peak	53662	156	0.4416936301	0.3293554599
NC_009333	53954..53978	Peak	53968	25	0.2877950958	0.3867517958
NC_009333	54199..54210	Peak	54204	12	0.361300486	0.3589374152
NC_009333	54410..54480	Peak	54442	71	0.1294128447	0.4485154923
NC_009333	54734..54804	Peak	54766	71	0.1294128447	0.4485154923
NC_009333	55080..55139	Peak	55107	60	0.3032792029	0.380838547
NC_009333	55313..55388	Peak	55350	76	0.1710811715	0.4320799703
NC_009333	55686..55740	Peak	55712	55	0.6869838996	0.2460464372
NC_009333	56049..56117	Peak	56078	69	0.7245875476	0.2343525502
NC_009333	56546..56640	Peak	56602	95	0.1710811715	0.4320799703
NC_009333	56876..56927	Peak	56891	52	0.3669606891	0.3568241705
NC_009333	57082..57105	Peak	57088	24	0.1924235016	0.4237052424
NC_009333	57235..57287	Peak	57254	53	0.2337428778	0.407592299
NC_009333	57553..57599	Peak	57578	47	0.4072003551	0.3419304204
NC_009333	57800..57885	Peak	57831	86	0.4311692302	0.3331726626
NC_009333	58197..58402	Peak	58339	206	0.6656914212	0.252804179
NC_009333	58906..58985	Peak	58932	80	3.4962653068	2.359E-4
NC_009333	59460..59565	Peak	59515	106	0.3444172883	0.3652662446
NC_009333	59745..59809	Peak	59776	65	0.9854249251	0.1622076957
NC_009333	60238..60248	Peak	60242	11	0.1194403556	0.4524632455
NC_009333	60403..60493	Peak	60473	91	0.306192092	0.3797291966
NC_009333	60682..60752	Peak	60714	71	0.1294128447	0.4485154923
NC_009333	60974..60988	Peak	60981	15	0.1310898078	0.4478521319
NC_009333	61427..61497	Peak	61467	71	0.3745688563	0.3539905693
NC_009333	61595..61748	Peak	61726	154	0.744616046	0.2282519324
NC_009333	61835..62033	Peak	61912	199	0.358187909	0.3601013475
NC_009333	62110..62164	Peak	62126	55	0.374221042	0.3541199351
NC_009333	62299..62353	Peak	62322	55	0.2678992793	0.3943884242
NC_009333	62653..62809	Peak	62663	157	0.7103558679	0.2387417415
NC_009333	63033..63055	Peak	63034	23	0.1089419311	0.4566242742
NC_009333	63184..63230	Peak	63219	47	0.1143247234	0.4544901923
NC_009333	63383..63535	Peak	63516	153	0.4327012582	0.3326159078
NC_009333	63850..63907	Peak	63878	58	0.5583496231	0.2883028329
NC_009333	64350..64476	Peak	64395	127	0.3878448391	0.3490654305
NC_009333	64762..64832	Peak	64799	71	0.3506488809	0.3629258902
NC_009333	65203..65232	Peak	65210	30	0.2296833593	0.4091689133
NC_009333	65463..65542	Peak	65505	80	0.6602874763	0.2545346827
NC_009333	65778..65833	Peak	65810	56	0.316994893	0.3756237387
NC_009333	66337..66432	Peak	66373	96	0.2008705177	0.4203999106
NC_009333	66627..66653	Peak	66634	27	0.2245726803	0.41115586
NC_009333	66879..66944	Peak	66909	66	0.2835279448	0.3883860816
NC_009333	67378..67495	Peak	67468	118	0.4014603341	0.3440406182
NC_009333	67845..67867	Peak	67857	23	0.1096849265	0.4563296276
NC_009333	68153..68166	Peak	68158	14	0.165605092	0.4342338699
NC_009333	68328..68410	Peak	68392	83	1.6064702783	0.0540853101
NC_009333	68924..68959	Peak	68952	36	0.1892262023	0.4249577661
NC_009333	69474..69551	Peak	69515	78	1.1241454573	0.1304756618
NC_009333	69791..69852	Peak	69795	62	0.1321363049	0.4474382403
NC_009333	70122..70137	Peak	70127	16	0.1113644224	0.4556636857
NC_009333	70272..70359	Peak	70317	88	0.6142502869	0.269524974
NC_009333	70654..70732	Peak	70689	79	0.2115002692	0.4162484611
NC_009333	70947..70987	Peak	70975	41	0.3594621481	0.3596246948
NC_009333	71156..71214	Peak	71187	59	0.5279029956	0.2987833327
NC_009333	71446..71502	Peak	71453	57	0.1824064351	0.427631888
NC_009333	71691..71791	Peak	71721	101	0.4811803706	0.3151941553
NC_009333	71951..72091	Peak	72011	141	0.5310723167	0.2976843335
NC_009333	72362..72390	Peak	72368	29	0.227022163	0.4102032543
NC_009333	72556..72673	Peak	72607	118	0.3506304139	0.3629328182
NC_009333	72871..72938	Peak	72907	68	0.4496735869	0.3264729097
NC_009333	73204..73273	Peak	73232	70	0.1294128447	0.4485154923
NC_009333	73370..73439	Peak	73401	70	0.1710811715	0.4320799703
NC_009333	73839..73981	Peak	73943	143	0.2150346583	0.4148701486
NC_009333	74158..74263	Peak	74223	106	0.7253110682	0.2341306086
NC_009333	74789..74843	Peak	74811	55	1.0909507917	0.1376472679
NC_009333	75311..75382	Peak	75344	72	0.1571357602	0.4375689275
NC_009333	75533..75592	Peak	75565	60	0.724374232	0.2344180076
NC_009333	75801..75852	Peak	75821	52	0.2442169419	0.4035314033
NC_009333	76414..76470	Peak	76445	57	0.5033548956	0.3073573886
NC_009333	76772..76847	Peak	76808	76	0.8853796888	0.1879759417
NC_009333	77005..77099	Peak	77061	95	0.1710811715	0.4320799703
NC_009333	77319..77360	Peak	77345	42	0.3476751179	0.3640420926
NC_009333	77497..77639	Peak	77536	143	0.4624221404	0.3218893125
NC_009333	77858..77900	Peak	77892	43	0.3522549156	0.362323548
NC_009333	78063..78197	Peak	78162	135	0.21566653	0.4146238462
NC_009333	78443..78455	Peak	78449	13	0.1632630192	0.4351556748
NC_009333	78797..78841	Peak	78810	45	0.3908697154	0.3479467702
NC_009333	79294..79365	Peak	79324	72	0.7076659685	0.2395763579
NC_009333	80024..80165	Peak	80095	142	0.7876363461	0.2154547242
NC_009333	80487..80581	Peak	80543	95	0.1710811715	0.4320799703
NC_009333	80822..80851	Peak	80833	30	0.3069374828	0.379445479
NC_009333	81140..81196	Peak	81163	57	0.3191074289	0.3748225252
NC_009333	81430..81505	Peak	81455	76	0.2655808564	0.3952810153
NC_009333	81612..81673	Peak	81637	62	0.5445857028	0.293019245
NC_009333	81865..81957	Peak	81906	93	1.664940977	0.047962266
NC_009333	82230..82309	Peak	82293	80	0.3033740926	0.3808023935
NC_009333	82544..82557	Peak	82551	14	0.0777992407	0.4689938752
NC_009333	82944..83053	Peak	83013	110	0.4899215017	0.3120947236
NC_009333	83189..83241	Peak	83211	53	0.3181876459	0.3751713017
NC_009333	83576..83618	Peak	83595	43	0.3393914741	0.3671574203
NC_009333	84140..84193	Peak	84175	54	0.3665959281	0.356960223
NC_009333	84718..84767	Peak	84733	50	0.1830469261	0.4273805994
NC_009333	85076..85157	Peak	85123	82	0.2242796538	0.4112698534
NC_009333	85625..85694	Peak	85666	70	1.2885422987	0.0987786273
NC_009333	86213..86277	Peak	86248	65	0.4229767898	0.3361560977
NC_009333	86601..86613	Peak	86611	13	0.0463723338	0.4815067436
NC_009333	86992..87012	Peak	86997	21	0.1244211532	0.4504909128
NC_009333	87780..87791	Peak	87783	12	0.1037052392	0.4587016344
NC_009333	87979..87991	Peak	87989	13	0.0463723338	0.4815067436
NC_009333	88214..88285	Peak	88246	72	0.1294128447	0.4485154923
NC_009333	88578..88685	Peak	88612	108	0.4408346431	0.3296663558
NC_009333	88916..89006	Peak	88949	91	0.5049469177	0.3067980598
NC_009333	89495..89516	Peak	89503	22	0.7275034461	0.2334588025
NC_009333	89917..89968	Peak	89937	52	0.5721204497	0.2836201879
NC_009333	90479..90582	Peak	90573	104	0.3652190195	0.357473961
NC_009333	90914..90998	Peak	90968	85	2.212340571	0.0134715709
NC_009333	91412..91504	Peak	91441	93	0.5587790479	0.2881562617
NC_009333	91811..92003	Peak	91869	193	0.4452970601	0.3280525461
NC_009333	92265..92288	Peak	92275	24	0.2835447158	0.3883796546
NC_009333	92669..92775	Peak	92742	107	0.550166964	0.2911024301
NC_009333	92867..92961	Peak	92923	95	0.1710811715	0.4320799703
NC_009333	93109..93155	Peak	93124	47	0.3273691994	0.3716943297
NC_009333	93415..93501	Peak	93465	87	0.5275178537	0.2989170108
NC_009333	93733..93912	Peak	93891	180	1.1556469525	0.1239127973
NC_009333	94091..94167	Peak	94150	77	0.5332680106	0.2969240342
NC_009333	94518..94579	Peak	94542	62	0.5919606382	0.2769384734
NC_009333	95123..95172	Peak	95139	50	0.2050513067	0.4187660198
NC_009333	95359..95400	Peak	95367	42	0.2403423589	0.4050324297
NC_009333	95544..95613	Peak	95575	70	0.1710811715	0.4320799703
NC_009333	95693..95873	Peak	95833	181	0.2316367203	0.4084100922
NC_009333	96043..96128	Peak	96072	86	0.3026508073	0.3810779953
NC_009333	96246..96313	Peak	96278	68	0.6879178596	0.2457522546
NC_009333	96778..96789	Peak	96784	12	0.1600143113	0.4364349003
NC_009333	96981..97126	Peak	97046	146	0.4670743977	0.3202233254
NC_009333	97492..97639	Peak	97588	148	0.5594555843	0.2879254178
NC_009333	97854..97969	Peak	97937	116	0.1710811715	0.4320799703
NC_009333	98340..98348	Peak	98344	9	0.0969526484	0.4613819991
NC_009333	98611..98705	Peak	98667	95	0.1710811715	0.4320799703
NC_009333	98987..99034	Peak	98998	48	0.7008498317	0.2416983679
NC_009333	99433..99501	Peak	99488	69	0.5376163993	0.2954209531
NC_009333	99831..99870	Peak	99835	40	0.1380146458	0.4451144213
NC_009333	100031..100046	Peak	100037	16	0.1242642797	0.4505530144
NC_009333	100256..100331	Peak	100297	76	0.3282831471	0.3713487927
NC_009333	100502..100521	Peak	100516	20	0.139350274	0.4445866822
NC_009333	100686..100755	Peak	100717	70	0.1710811715	0.4320799703
NC_009333	101423..101475	Peak	101445	53	0.5843136415	0.279504658
NC_009333	101830..101995	Peak	101872	166	0.2122925499	0.4159394036
NC_009333	102303..102371	Peak	102322	69	0.3659845077	0.357188318
NC_009333	102513..102560	Peak	102529	48	0.3909602823	0.347913297
NC_009333	102767..102907	Peak	102846	141	0.4351677118	0.3317203486
NC_009333	103074..103131	Peak	103094	58	0.4772553838	0.3165901387
NC_009333	103413..103599	Peak	103459	187	0.6897180394	0.2451857596
NC_009333	103905..103937	Peak	103927	33	0.4659853518	0.3206129928
NC_009333	104553..104702	Peak	104677	150	0.4853192437	0.3137249535
NC_009333	104985..105027	Peak	104999	43	0.1646887693	0.4345944785
NC_009333	105380..105408	Peak	105393	29	0.1204246024	0.4520734017
NC_009333	105732..105743	Peak	105743	12	0.0480648735	0.4808322704
NC_009333	106228..106336	Peak	106256	109	0.2573749945	0.3984446522
NC_009333	106514..106570	Peak	106550	57	0.6897779823	0.2451669084
NC_009333	106910..107004	Peak	106966	95	0.1710811715	0.4320799703
NC_009333	107356..107447	Peak	107391	92	0.6440515455	0.2597710048
NC_009333	108153..108178	Peak	108173	26	0.1290623337	0.448654163
NC_009333	108362..108432	Peak	108394	71	0.1294128447	0.4485154923
NC_009333	108587..108657	Peak	108619	71	0.1294128447	0.4485154923
NC_009333	108797..108814	Peak	108800	18	0.1085543025	0.4567780039
NC_009333	108963..109118	Peak	109034	156	0.4106127535	0.3406782553
NC_009333	109452..109455	Peak	109455	4	0.0265775944	0.489398322
NC_009333	109731..109771	Peak	109743	41	0.0724831276	0.4711087162
NC_009333	110315..110331	Peak	110318	17	0.0917480605	0.4634491058
NC_009333	110771..110797	Peak	110792	27	0.1276658761	0.449206698
NC_009333	111242..111312	Peak	111281	71	0.362874415	0.3583493499
NC_009333	111480..111551	Peak	111513	72	0.1571357602	0.4375689275
NC_009333	111840..111932	Peak	111911	93	0.648761848	0.2582461605
NC_009333	112109..112148	Peak	112130	40	0.2918569781	0.3851979892
NC_009333	112302..112321	Peak	112320	20	0.052471567	0.4790764752
NC_009333	112582..112749	Peak	112697	168	0.7489481743	0.2269442214
NC_009333	112896..112920	Peak	112910	25	0.4698130244	0.3192443041
NC_009333	113314..113426	Peak	113369	113	0.4036069175	0.343250899
NC_009333	113709..113726	Peak	113717	18	0.2833554365	0.3884521928
NC_009333	114039..114053	Peak	114047	15	0.2044290154	0.419009129
NC_009333	114351..114360	Peak	114355	10	0.148020688	0.4411632207
NC_009333	114500..114591	Peak	114558	92	0.2079533506	0.4176326959
NC_009333	114708..114765	Peak	114740	58	0.2220102994	0.4121529328
NC_009333	114952..115000	Peak	114967	49	0.1895021594	0.4248496314
NC_009333	115206..115309	Peak	115242	104	0.556512944	0.2889301241
NC_009333	115516..115539	Peak	115528	24	0.5051903543	0.3067125722
NC_009333	115665..115719	Peak	115703	55	0.23399347	0.4074950241
NC_009333	115911..115981	Peak	115943	71	0.1294128447	0.4485154923
NC_009333	116252..116264	Peak	116260	13	0.1555682984	0.4381866574
NC_009333	116653..116731	Peak	116706	79	0.2134777856	0.4154771572
NC_009333	117219..117258	Peak	117250	40	0.1749129783	0.4305740061
NC_009333	117528..117583	Peak	117565	56	0.869867268	0.1921864725
NC_009333	117771..117785	Peak	117772	15	0.1520355977	0.4395794295
NC_009333	117944..118018	Peak	118000	75	1.0385262988	0.149512549
NC_009333	118188..118252	Peak	118213	65	0.9436636668	0.1726707732
NC_009333	118859..118884	Peak	118866	26	0.2480072443	0.4020644009
NC_009333	119142..119361	Peak	119214	220	0.276085967	0.3912410193
NC_009333	119641..119721	Peak	119696	81	2.190805246	0.0142329444
NC_009333	120068..120146	Peak	120108	79	0.1710811715	0.4320799703
NC_009333	120416..120549	Peak	120435	134	0.2771533401	0.3908311829
NC_009333	121031..121077	Peak	121053	47	0.3713923453	0.3551726631
NC_009333	121488..121513	Peak	121497	26	0.2109765187	0.4164527971
NC_009333	121669..121676	Peak	121671	8	0.0323114623	0.4871118342
NC_009333	121977..122049	Peak	121982	73	0.4566463916	0.3239626143
NC_009333	122310..122487	Peak	122339	178	0.9269643441	0.1769725237
NC_009333	122545..122614	Peak	122596	70	0.3779231562	0.3527438399
NC_009333	122984..123058	Peak	123022	75	0.9055577608	0.1825849872
NC_009333	123356..123550	Peak	123430	195	0.4578487786	0.3235305443
NC_009333	123686..123755	Peak	123723	70	0.7355420331	0.2310047254
NC_009333	124018..124066	Peak	124054	49	0.8163093691	0.2071616086
NC_009333	124183..124264	Peak	124225	82	0.7554204975	0.2249983591
NC_009333	124837..124935	Peak	124874	99	1.6391799552	0.0505878936
NC_009333	125232..125404	Peak	125296	173	0.6837590599	0.2470636613
NC_009333	125481..125535	Peak	125495	55	0.5778037617	0.2816983077
NC_009333	126241..126333	Peak	126301	93	4.2628226702	1.009E-5
NC_009333	126764..126813	Peak	126787	50	0.157729208	0.437335092
NC_009333	127113..127123	Peak	127119	11	0.2431910361	0.4039287053
NC_009333	127596..127650	Peak	127616	55	0.3604148425	0.3592684644
NC_009333	127954..128121	Peak	128094	168	0.4710432114	0.3188049387
NC_009333	128500..128603	Peak	128532	104	0.2815166249	0.3891570893
NC_009333	128767..128812	Peak	128790	46	0.4435465971	0.3286852114
NC_009333	129039..129146	Peak	129122	108	0.2373061003	0.4062096649
NC_009333	129653..129713	Peak	129677	61	0.5630881369	0.2866874346
NC_009333	129849..129916	Peak	129879	68	1.1571359223	0.1236084161
NC_009333	130295..130324	Peak	130301	30	0.2044013617	0.4190199331
NC_009333	130619..130667	Peak	130639	49	0.5370335188	0.2956222306
NC_009333	131054..131142	Peak	131094	89	0.308068332	0.3790151688
NC_009333	131502..131571	Peak	131558	70	0.1710811715	0.4320799703
NC_009333	131896..131921	Peak	131903	26	0.2215362249	0.4123374669
NC_009333	132566..132582	Peak	132569	17	0.0917480605	0.4634491058
NC_009333	132870..132927	Peak	132902	58	0.1294128447	0.4485154923
NC_009333	133537..133588	Peak	133553	52	0.7142728407	0.2375292415
NC_009333	134391..134454	Peak	134426	64	0.501978374	0.3078413667
NC_009333	134626..134659	Peak	134650	34	0.316364785	0.3758628214
NC_009333	135261..135340	Peak	135315	80	1.3696074105	0.0854047425
NC_009333	135473..135563	Peak	135509	91	1.7702322439	0.03834423
NC_009333	135931..135998	Peak	135969	68	0.8440374077	0.1993242512
NC_009333	136290..136331	Peak	136321	42	0.7414948064	0.2291967398
NC_009333	136712..136808	Peak	136743	97	0.8110762175	0.2086609512
NC_009333	136923..136972	Peak	136945	50	0.6187746352	0.2680324171
NC_009333	137342..137410	Peak	137379	69	0.3506488809	0.3629258902
