# Supplementary material for: Epigenetic Reprogramming of Kaposi’s Sarcoma-Associated Herpesvirus during Hypoxic Reactivation
Source: Cancers (Basel). 2022 Nov 2;14(21):5396. doi: 10.3390/cancers14215396 (PMC9654037; doi:10.3390/cancers14215396)
Supplement: Supplementary file 1 [file cancers-14-05396-s001.zip › RTA Normoxia.csv]

Chromosome	Region	Name	Center of peak	Length	Peak shape score	P-value
NC_009333	33..89	Peak	68	57	0.1589646109	0.4368483778
NC_009333	217..261	Peak	231	45	0.2328614869	0.4079344827
NC_009333	393..419	Peak	395	27	0.1106555924	0.4559447309
NC_009333	451..509	Peak	470	59	0.1461539422	0.4418999319
NC_009333	620..638	Peak	635	19	0.0835412866	0.4667105751
NC_009333	679..732	Peak	714	54	0.1443076635	0.4426287635
NC_009333	847..890	Peak	864	44	0.170398114	0.4323485276
NC_009333	956..1015	Peak	976	60	0.734523194	0.2313149647
NC_009333	1231..1280	Peak	1254	50	0.244722246	0.4033357509
NC_009333	1419..1473	Peak	1447	55	0.5773144514	0.2818635265
NC_009333	1587..1610	Peak	1601	24	0.099484895	0.4603766402
NC_009333	1661..1714	Peak	1691	54	0.380266294	0.3518738765
NC_009333	1810..1857	Peak	1842	48	0.2801502899	0.3896811015
NC_009333	2085..2148	Peak	2127	64	0.3696790626	0.355810817
NC_009333	2148..2219	Peak	2194	72	0.347396823	0.3641466099
NC_009333	2222..2285	Peak	2259	64	0.3797129367	0.3520792581
NC_009333	2297..2355	Peak	2334	59	0.2089200838	0.4172553128
NC_009333	2448..2489	Peak	2461	42	0.4313323058	0.3331133818
NC_009333	2569..2575	Peak	2570	7	0.0591052185	0.4764341511
NC_009333	2719..2758	Peak	2732	40	0.0596084254	0.4762337539
NC_009333	2862..2893	Peak	2874	32	0.1263112146	0.4497427897
NC_009333	2918..2956	Peak	2946	39	0.1579187902	0.4372603957
NC_009333	3407..3409	Peak	3407	3	0.025640445	0.4897720631
NC_009333	3653..3677	Peak	3662	25	2.25E-3	0.4991024524
NC_009333	3817..3877	Peak	3841	61	0.1135015236	0.4548164776
NC_009333	4006..4058	Peak	4024	53	0.1055167594	0.4579828861
NC_009333	4286..4335	Peak	4310	50	0.0846357989	0.4662754689
NC_009333	4601..4638	Peak	4615	38	0.1345297621	0.4464918391
NC_009333	4695..4741	Peak	4729	47	0.4337992103	0.3322171276
NC_009333	4861..4908	Peak	4886	48	0.2211439667	0.4124901686
NC_009333	4908..4969	Peak	4943	62	0.2229583066	0.4117839781
NC_009333	5108..5155	Peak	5140	48	0.1617451789	0.4357532627
NC_009333	5317..5374	Peak	5357	58	0.7660067718	0.2218361364
NC_009333	5448..5490	Peak	5454	43	0.0787532894	0.4686144291
NC_009333	5581..5641	Peak	5615	61	0.2041543156	0.4191164551
NC_009333	5678..5740	Peak	5705	63	0.1525734409	0.4393673354
NC_009333	5910..5974	Peak	5934	65	0.1202339635	0.452148907
NC_009333	5974..6014	Peak	6002	41	0.0995748538	0.4603409292
NC_009333	6179..6211	Peak	6187	33	0.0469700182	0.4812685616
NC_009333	6502..6549	Peak	6518	48	0.1047767242	0.4582764899
NC_009333	6703..6776	Peak	6725	74	0.0169050631	0.4932561768
NC_009333	6797..6857	Peak	6818	61	0.0582443474	0.4767769983
NC_009333	6946..6997	Peak	6971	52	0.1799622908	0.4285910862
NC_009333	7125..7186	Peak	7152	62	0.0783797707	0.4687629823
NC_009333	7248..7299	Peak	7282	52	0.2013527633	0.4202113741
NC_009333	7391..7458	Peak	7434	68	0.0819815134	0.4673307071
NC_009333	7842..7888	Peak	7876	47	0.1744500443	0.4307558938
NC_009333	8098..8138	Peak	8116	41	0.1336060556	0.4468570477
NC_009333	8408..8428	Peak	8415	21	0.0575843329	0.4770398647
NC_009333	8456..8505	Peak	8495	50	0.0806922478	0.467843351
NC_009333	8700..8701	Peak	8700	2	7.675E-3	0.4969382707
NC_009333	8822..8832	Peak	8826	11	0.0138536996	0.4944733503
NC_009333	8906..8959	Peak	8933	54	0.398829546	0.3450094025
NC_009333	9156..9211	Peak	9185	56	0.2506925597	0.4010259068
NC_009333	9226..9273	Peak	9255	48	0.1513416076	0.4398531246
NC_009333	9352..9398	Peak	9374	47	0.0872493244	0.4652366668
NC_009333	9507..9562	Peak	9522	56	0.1135015236	0.4548164776
NC_009333	9803..9873	Peak	9830	71	2.25E-3	0.4991024524
NC_009333	10082..10138	Peak	10107	57	0.0857673963	0.4658256625
NC_009333	10232..10278	Peak	10259	47	2.25E-3	0.4991024524
NC_009333	10393..10440	Peak	10413	48	0.1011492247	0.4597160014
NC_009333	10517..10546	Peak	10529	30	0.0750296387	0.4700955651
NC_009333	10745..10775	Peak	10759	31	0.0868527173	0.4653942918
NC_009333	10988..11058	Peak	11008	71	0.1332003196	0.447017479
NC_009333	11058..11088	Peak	11070	31	0.1870663087	0.4258043218
NC_009333	11156..11194	Peak	11161	39	0.0687965643	0.4725757764
NC_009333	11259..11314	Peak	11286	56	0.1437797693	0.4428371893
NC_009333	11446..11484	Peak	11471	39	0.0169050631	0.4932561768
NC_009333	11537..11607	Peak	11564	71	0.0783797707	0.4687629823
NC_009333	11657..11715	Peak	11696	59	0.1215842901	0.4516141279
NC_009333	11913..11952	Peak	11931	40	0.0853664585	0.465985029
NC_009333	12019..12078	Peak	12028	60	0.0218579234	0.4912806445
NC_009333	12078..12118	Peak	12116	41	2.25E-3	0.4991024524
NC_009333	12408..12469	Peak	12452	62	0.1851939425	0.42653846
NC_009333	12517..12571	Peak	12545	55	0.2879073221	0.386708841
NC_009333	12630..12652	Peak	12640	23	0.0125856641	0.494979179
NC_009333	12748..12795	Peak	12759	48	0.1952175786	0.422611309
NC_009333	12962..13023	Peak	12989	62	0.0783797707	0.4687629823
NC_009333	13233..13247	Peak	13240	15	0.0428989417	0.4828910462
NC_009333	13335..13346	Peak	13339	12	0.0426828292	0.4829771837
NC_009333	13564..13620	Peak	13604	57	0.1772580802	0.4296528383
NC_009333	13875..13931	Peak	13914	57	0.1091141576	0.4565559729
NC_009333	14241..14293	Peak	14278	53	2.25E-3	0.4991024524
NC_009333	14372..14426	Peak	14399	55	0.1321500696	0.4474327967
NC_009333	14454..14517	Peak	14491	64	0.1009149718	0.459808979
NC_009333	14574..14598	Peak	14585	25	0.0169050631	0.4932561768
NC_009333	14652..14731	Peak	14679	80	0.0919080354	0.4633855536
NC_009333	14746..14810	Peak	14770	65	0.0850879797	0.4660957232
NC_009333	14812..14855	Peak	14839	44	0.0672163954	0.4732047165
NC_009333	14895..14958	Peak	14941	64	0.1091141576	0.4565559729
NC_009333	15301..15322	Peak	15310	22	0.057460415	0.4770892191
NC_009333	15821..15868	Peak	15838	48	0.0769152152	0.4693454967
NC_009333	15923..15952	Peak	15945	30	0.0125856641	0.494979179
NC_009333	16128..16186	Peak	16160	59	0.3183238684	0.3751196404
NC_009333	16300..16361	Peak	16327	62	0.0927864411	0.4630366115
NC_009333	16541..16557	Peak	16544	17	2.25E-3	0.4991024524
NC_009333	16738..16785	Peak	16760	48	0.1000861894	0.4601379498
NC_009333	16909..16968	Peak	16946	60	0.8273019109	0.2040329805
NC_009333	17103..17156	Peak	17140	54	0.5675114	0.2851833918
NC_009333	17281..17313	Peak	17293	33	0.0691328569	0.4724419338
NC_009333	17491..17503	Peak	17503	13	0.0289512634	0.4884517302
NC_009333	17825..17829	Peak	17825	5	0.0125856641	0.494979179
NC_009333	17976..18026	Peak	17994	51	0.0833410179	0.4667901931
NC_009333	18062..18120	Peak	18087	59	0.0877849781	0.4650237887
NC_009333	18196..18237	Peak	18219	42	2.25E-3	0.4991024524
NC_009333	18529..18608	Peak	18582	80	0.2682757929	0.394243519
NC_009333	18617..18679	Peak	18659	63	0.1482046699	0.4410906232
NC_009333	18789..18811	Peak	18804	23	0.0437823628	0.482538943
NC_009333	18956..19016	Peak	18980	61	0.1135015236	0.4548164776
NC_009333	19115..19171	Peak	19142	57	0.4233401148	0.3360235652
NC_009333	19252..19300	Peak	19266	49	0.3141345228	0.3767094351
NC_009333	19404..19456	Peak	19417	53	0.1340129294	0.4466961753
NC_009333	19622..19658	Peak	19652	37	0.1091141576	0.4565559729
NC_009333	20053..20071	Peak	20056	19	0.0569096419	0.4773085868
NC_009333	20113..20125	Peak	20121	13	0.0236507866	0.4905655808
NC_009333	20303..20323	Peak	20315	21	0.0421526931	0.4831884872
NC_009333	20439..20475	Peak	20467	37	0.0656266944	0.4738375179
NC_009333	20669..20714	Peak	20690	46	0.0999415184	0.4601953772
NC_009333	21204..21236	Peak	21226	33	0.1819039058	0.4278290696
NC_009333	21408..21456	Peak	21429	49	2.25E-3	0.4991024524
NC_009333	21588..21646	Peak	21612	59	0.2566797798	0.398712991
NC_009333	21685..21737	Peak	21708	53	0.2157723102	0.4145826166
NC_009333	21863..21915	Peak	21887	53	0.0901477383	0.464084907
NC_009333	22017..22052	Peak	22025	36	0.0601076161	0.4760349621
NC_009333	22159..22182	Peak	22182	24	2.25E-3	0.4991024524
NC_009333	22605..22635	Peak	22618	31	0.2217302946	0.4122619227
NC_009333	22702..22731	Peak	22718	30	0.1957427434	0.4224057636
NC_009333	22808..22874	Peak	22848	67	0.0924122515	0.4631852529
NC_009333	22980..23015	Peak	23008	36	0.0169050631	0.4932561768
NC_009333	23061..23116	Peak	23085	56	0.0232843276	0.4907117366
NC_009333	23181..23220	Peak	23197	40	0.0846553709	0.4662676887
NC_009333	23328..23364	Peak	23343	37	2.25E-3	0.4991024524
NC_009333	23473..23529	Peak	23498	57	1.1560663607	0.1238270072
NC_009333	23634..23705	Peak	23679	72	0.1844646864	0.4268244639
NC_009333	23750..23807	Peak	23773	58	0.1181030434	0.452993006
NC_009333	24098..24136	Peak	24115	39	2.25E-3	0.4991024524
NC_009333	24268..24331	Peak	24289	64	2.25E-3	0.4991024524
NC_009333	24402..24471	Peak	24445	70	2.25E-3	0.4991024524
NC_009333	24498..24558	Peak	24515	61	2.25E-3	0.4991024524
NC_009333	24628..24648	Peak	24645	21	2.25E-3	0.4991024524
NC_009333	24677..24728	Peak	24713	52	2.25E-3	0.4991024524
NC_009333	24917..24976	Peak	24934	60	2.25E-3	0.4991024524
NC_009333	24988..25036	Peak	25023	49	0.0169050631	0.4932561768
NC_009333	25075..25144	Peak	25122	70	0.0819854856	0.4673291277
NC_009333	25221..25289	Peak	25237	69	0.1244416816	0.4504827863
NC_009333	25570..25574	Peak	25574	5	3.604E-3	0.4985622875
NC_009333	25751..25773	Peak	25760	23	0.2623985029	0.3965071134
NC_009333	26014..26082	Peak	26044	69	2.25E-3	0.4991024524
NC_009333	26205..26242	Peak	26234	38	0.0770632422	0.4692866172
NC_009333	26548..26593	Peak	26586	46	0.0439745217	0.4824623565
NC_009333	26805..26871	Peak	26853	67	0.2643175757	0.3957676091
NC_009333	27297..27358	Peak	27324	62	0.0783797707	0.4687629823
NC_009333	27477..27520	Peak	27497	44	2.25E-3	0.4991024524
NC_009333	27724..27762	Peak	27745	39	0.0656313975	0.4738356457
NC_009333	27804..27841	Peak	27837	38	0.0478286214	0.4809264131
NC_009333	27895..27955	Peak	27929	61	0.164090716	0.4348298652
NC_009333	28144..28189	Peak	28156	46	0.1954869268	0.4225058856
NC_009333	28212..28275	Peak	28250	64	0.2467049382	0.4025682923
NC_009333	28417..28474	Peak	28439	58	0.3507183008	0.3628998473
NC_009333	28584..28628	Peak	28615	45	0.0678028305	0.4729712953
NC_009333	28950..29004	Peak	28974	55	0.1082897434	0.4568829292
NC_009333	29138..29153	Peak	29144	16	0.0268031669	0.4893083637
NC_009333	29264..29314	Peak	29295	51	0.1965016075	0.4221087873
NC_009333	29382..29429	Peak	29396	48	0.2582994297	0.3980879132
NC_009333	29429..29481	Peak	29459	53	0.2834541736	0.3884143529
NC_009333	29576..29588	Peak	29583	13	0.0755647202	0.4698827027
NC_009333	29773..29831	Peak	29805	59	0.7425647289	0.2288726247
NC_009333	30039..30070	Peak	30054	32	0.1184996927	0.4528358693
NC_009333	30273..30341	Peak	30315	69	0.1743863165	0.4307809337
NC_009333	30500..30545	Peak	30513	46	0.104753054	0.4582858813
NC_009333	30830..30857	Peak	30843	28	0.2053364574	0.418654631
NC_009333	31045..31072	Peak	31046	28	2.25E-3	0.4991024524
NC_009333	31360..31439	Peak	31413	80	0.1201880423	0.452167095
NC_009333	31727..31778	Peak	31743	52	0.1079530856	0.4570164534
NC_009333	31893..31934	Peak	31917	42	2.25E-3	0.4991024524
NC_009333	32462..32510	Peak	32471	49	0.0956601355	0.4618952514
NC_009333	32580..32598	Peak	32589	19	0.0601918625	0.4760014134
NC_009333	32780..32840	Peak	32804	61	0.1135015236	0.4548164776
NC_009333	32940..32987	Peak	32956	48	0.0680617271	0.4728682485
NC_009333	33038..33091	Peak	33061	54	0.0125856641	0.494979179
NC_009333	33173..33229	Peak	33200	57	2.25E-3	0.4991024524
NC_009333	33308..33358	Peak	33329	51	2.25E-3	0.4991024524
NC_009333	33516..33571	Peak	33545	56	0.1825993773	0.4275561865
NC_009333	33637..33680	Peak	33658	44	0.059049972	0.4764561528
NC_009333	33886..33914	Peak	33901	29	0.0169050631	0.4932561768
NC_009333	33967..34034	Peak	33994	68	0.0783797707	0.4687629823
NC_009333	34114..34169	Peak	34133	56	0.1884750797	0.4252521245
NC_009333	34445..34504	Peak	34478	60	0.0925985816	0.4631112353
NC_009333	34615..34680	Peak	34654	66	0.2880873617	0.3866399333
NC_009333	35016..35069	Peak	35053	54	0.1709201619	0.4321432715
NC_009333	35115..35187	Peak	35137	73	0.0926684426	0.4630834841
NC_009333	35265..35281	Peak	35278	17	2.25E-3	0.4991024524
NC_009333	35408..35465	Peak	35431	58	0.2284397843	0.4096521818
NC_009333	35604..35649	Peak	35620	46	0.1565738399	0.4377903605
NC_009333	35974..36024	Peak	36010	51	0.2139236706	0.4153032905
NC_009333	36101..36107	Peak	36101	7	0.0244610458	0.4902424277
NC_009333	36216..36229	Peak	36226	14	0.0271148951	0.4891840473
NC_009333	36606..36654	Peak	36623	49	0.2446988825	0.4033447967
NC_009333	36893..36944	Peak	36915	52	0.1615991557	0.4358107611
NC_009333	37000..37045	Peak	37014	46	0.1525981996	0.4393575724
NC_009333	37144..37161	Peak	37145	18	2.25E-3	0.4991024524
NC_009333	37205..37220	Peak	37209	16	2.25E-3	0.4991024524
NC_009333	37357..37419	Peak	37397	63	0.4102392838	0.3408152132
NC_009333	37468..37522	Peak	37496	55	0.2039364794	0.4192015688
NC_009333	37564..37642	Peak	37589	79	0.1921375328	0.4238172378
NC_009333	37716..37773	Peak	37740	58	0.2189595133	0.4133407931
NC_009333	38153..38212	Peak	38175	60	0.0326001961	0.4869967067
NC_009333	38263..38324	Peak	38290	62	0.0783797707	0.4687629823
NC_009333	38459..38465	Peak	38465	7	0.0143000606	0.4942952957
NC_009333	38571..38616	Peak	38604	46	0.0678153565	0.4729663096
NC_009333	38680..38734	Peak	38700	55	0.1222986231	0.4513312612
NC_009333	38985..39026	Peak	38994	42	0.0636511649	0.4746239953
NC_009333	39308..39363	Peak	39340	56	0.7334273134	0.2316489227
NC_009333	39416..39494	Peak	39442	79	0.3132337783	0.3770515287
NC_009333	39549..39607	Peak	39573	59	0.1331693769	0.4470297144
NC_009333	40005..40020	Peak	40006	16	2.25E-3	0.4991024524
NC_009333	40179..40220	Peak	40189	42	0.0612543159	0.4755783365
NC_009333	40305..40357	Peak	40322	53	2.25E-3	0.4991024524
NC_009333	40434..40479	Peak	40451	46	2.25E-3	0.4991024524
NC_009333	40526..40563	Peak	40561	38	2.25E-3	0.4991024524
NC_009333	40642..40694	Peak	40645	53	2.25E-3	0.4991024524
NC_009333	40821..40839	Peak	40826	19	0.0169050631	0.4932561768
NC_009333	40952..40957	Peak	40952	6	7.101E-3	0.4971672182
NC_009333	41040..41077	Peak	41059	38	0.0673881828	0.4731363383
NC_009333	41145..41201	Peak	41158	57	0.0125856641	0.494979179
NC_009333	41254..41256	Peak	41254	3	5.193E-3	0.4979283384
NC_009333	41447..41495	Peak	41468	49	0.1356581698	0.4460457588
NC_009333	41776..41834	Peak	41817	59	0.1081260524	0.4569478513
NC_009333	41962..42002	Peak	41977	41	2.25E-3	0.4991024524
NC_009333	42034..42052	Peak	42049	19	2.25E-3	0.4991024524
NC_009333	42186..42232	Peak	42204	47	0.1559836007	0.4380229739
NC_009333	42869..42895	Peak	42870	27	2.25E-3	0.4991024524
NC_009333	42911..42938	Peak	42934	28	2.25E-3	0.4991024524
NC_009333	43006..43024	Peak	43021	19	4.201E-3	0.498324047
NC_009333	43119..43144	Peak	43130	26	0.1441703929	0.4426829599
NC_009333	43513..43565	Peak	43530	53	0.1199343358	0.4522675824
NC_009333	43727..43744	Peak	43740	18	2.25E-3	0.4991024524
NC_009333	43960..43994	Peak	43993	35	0.0594800976	0.4762848586
NC_009333	44153..44215	Peak	44180	63	0.3079564969	0.3790577175
NC_009333	44318..44369	Peak	44361	52	2.25E-3	0.4991024524
NC_009333	44683..44731	Peak	44696	49	0.1241281487	0.4506069055
NC_009333	44982..44989	Peak	44983	8	0.0176099126	0.4929750244
NC_009333	45051..45097	Peak	45066	47	0.1294989234	0.4484814384
NC_009333	45255..45315	Peak	45279	61	0.1135015236	0.4548164776
NC_009333	45432..45493	Peak	45459	62	0.0783797707	0.4687629823
NC_009333	45599..45619	Peak	45606	21	0.0169050631	0.4932561768
NC_009333	45672..45733	Peak	45699	62	0.0783797707	0.4687629823
NC_009333	45807..45861	Peak	45841	55	0.1763577608	0.4300064432
NC_009333	45910..45974	Peak	45948	65	0.1688477665	0.4329581927
NC_009333	46194..46250	Peak	46209	57	0.1634122547	0.4350969274
NC_009333	46379..46422	Peak	46384	44	2.25E-3	0.4991024524
NC_009333	46451..46512	Peak	46476	62	2.25E-3	0.4991024524
NC_009333	46513..46573	Peak	46538	61	2.25E-3	0.4991024524
NC_009333	46718..46730	Peak	46723	13	9.551E-3	0.4961897595
NC_009333	46945..47003	Peak	46977	59	0.2416739668	0.4045164016
NC_009333	47122..47185	Peak	47149	64	0.1501765778	0.4403126523
NC_009333	47192..47246	Peak	47219	55	0.1281876106	0.4490002522
NC_009333	47453..47502	Peak	47453	50	2.25E-3	0.4991024524
NC_009333	47533..47549	Peak	47534	17	2.25E-3	0.4991024524
NC_009333	47638..47660	Peak	47646	23	2.25E-3	0.4991024524
NC_009333	47844..47896	Peak	47871	53	0.0689027371	0.4725335199
NC_009333	48003..48063	Peak	48027	61	0.1135015236	0.4548164776
NC_009333	48189..48207	Peak	48194	19	0.0490531366	0.480438475
NC_009333	48380..48424	Peak	48393	45	0.1135015236	0.4548164776
NC_009333	48693..48732	Peak	48726	40	2.25E-3	0.4991024524
NC_009333	48940..48947	Peak	48940	8	0.0113240294	0.4954824624
NC_009333	49179..49258	Peak	49232	80	0.0963627846	0.4616162241
NC_009333	49462..49492	Peak	49473	31	2.25E-3	0.4991024524
NC_009333	49613..49667	Peak	49651	55	0.1617312412	0.4357587507
NC_009333	49762..49818	Peak	49794	57	0.1832330927	0.4273075649
NC_009333	50247..50305	Peak	50271	59	0.2208907512	0.4125887495
NC_009333	50458..50514	Peak	50492	57	0.096907754	0.4613998255
NC_009333	50692..50727	Peak	50710	36	0.0629088817	0.4749195312
NC_009333	51014..51046	Peak	51031	33	2.25E-3	0.4991024524
NC_009333	51102..51158	Peak	51133	57	2.25E-3	0.4991024524
NC_009333	51184..51246	Peak	51233	63	0.0169050631	0.4932561768
NC_009333	51415..51486	Peak	51460	72	0.4495921164	0.3265022868
NC_009333	51949..51987	Peak	51956	39	2.25E-3	0.4991024524
NC_009333	52035..52052	Peak	52042	18	2.25E-3	0.4991024524
NC_009333	52150..52180	Peak	52176	31	2.25E-3	0.4991024524
NC_009333	52292..52358	Peak	52312	67	2.25E-3	0.4991024524
NC_009333	52434..52482	Peak	52462	49	2.25E-3	0.4991024524
NC_009333	52567..52606	Peak	52591	40	2.25E-3	0.4991024524
NC_009333	52661..52679	Peak	52670	19	0.0192106624	0.4923365259
NC_009333	52729..52737	Peak	52734	9	0.0197147526	0.4921354611
NC_009333	52870..52909	Peak	52890	40	0.0304037835	0.4878725137
NC_009333	53064..53085	Peak	53071	22	0.0344430016	0.4862619467
NC_009333	53159..53224	Peak	53176	66	0.0125856641	0.494979179
NC_009333	53314..53374	Peak	53338	61	0.1135015236	0.4548164776
NC_009333	53446..53498	Peak	53468	53	0.1135015236	0.4548164776
NC_009333	53656..53704	Peak	53664	49	0.1135015236	0.4548164776
NC_009333	53802..53855	Peak	53834	54	0.1347873845	0.4463899903
NC_009333	54206..54266	Peak	54248	61	0.2992205791	0.3823858742
NC_009333	54456..54486	Peak	54458	31	2.25E-3	0.4991024524
NC_009333	54533..54603	Peak	54578	71	2.25E-3	0.4991024524
NC_009333	54876..54954	Peak	54901	79	0.1896314742	0.4247989609
NC_009333	54963..55020	Peak	55003	58	0.1191841054	0.4525647495
NC_009333	55138..55189	Peak	55153	52	2.25E-3	0.4991024524
NC_009333	55214..55232	Peak	55219	19	2.25E-3	0.4991024524
NC_009333	55478..55524	Peak	55507	47	0.0980941305	0.4609287741
NC_009333	55716..55771	Peak	55736	56	0.319775523	0.374569252
NC_009333	55926..55986	Peak	55943	61	2.25E-3	0.4991024524
NC_009333	56061..56102	Peak	56075	42	0.1330222811	0.4470878796
NC_009333	56207..56254	Peak	56222	48	0.0789207229	0.4685478401
NC_009333	56345..56386	Peak	56366	42	2.25E-3	0.4991024524
NC_009333	56416..56472	Peak	56459	57	2.25E-3	0.4991024524
NC_009333	56604..56664	Peak	56628	61	0.1135015236	0.4548164776
NC_009333	56938..56991	Peak	56955	54	0.1211725523	0.451777182
NC_009333	57223..57284	Peak	57263	62	0.1620303932	0.4356409599
NC_009333	57555..57609	Peak	57581	55	0.2130361285	0.4156493915
NC_009333	57805..57871	Peak	57845	67	0.4618650815	0.322089038
NC_009333	58044..58054	Peak	58045	11	0.0183848485	0.4926659198
NC_009333	58133..58147	Peak	58140	15	0.0438885609	0.4824966168
NC_009333	58295..58333	Peak	58309	39	0.1447962031	0.4424358901
NC_009333	58390..58428	Peak	58418	39	0.0592217047	0.4763877611
NC_009333	58751..58805	Peak	58776	55	0.124992553	0.450264723
NC_009333	58910..58967	Peak	58948	58	1.1326561495	0.1286793396
NC_009333	59052..59112	Peak	59074	61	0.3369527867	0.3680762458
NC_009333	59245..59271	Peak	59258	27	0.0169050631	0.4932561768
NC_009333	59375..59415	Peak	59392	41	0.1253243396	0.4501333919
NC_009333	59597..59647	Peak	59618	51	0.0610322484	0.4756667632
NC_009333	59742..59797	Peak	59767	56	0.385533555	0.3499210754
NC_009333	59879..59930	Peak	59913	52	0.1091141576	0.4565559729
NC_009333	60021..60067	Peak	60037	47	0.0680617271	0.4728682485
NC_009333	60104..60163	Peak	60144	60	0.2320322579	0.4082564796
NC_009333	60446..60476	Peak	60456	31	2.25E-3	0.4991024524
NC_009333	60970..61011	Peak	60983	42	0.1024985175	0.4591804948
NC_009333	61244..61275	Peak	61251	32	2.25E-3	0.4991024524
NC_009333	61428..61486	Peak	61460	59	0.2976109839	0.3830000452
NC_009333	61668..61731	Peak	61695	64	0.279101596	0.3900834292
NC_009333	62087..62143	Peak	62112	57	0.1181383861	0.4529790043
NC_009333	62502..62553	Peak	62525	52	0.5599214921	0.2877664942
NC_009333	62576..62654	Peak	62629	79	0.3656801232	0.3573018899
NC_009333	62661..62710	Peak	62689	50	0.4146923596	0.3391835631
NC_009333	62873	Peak	62873	1	0.0113102346	0.4954879654
NC_009333	63041..63095	Peak	63045	55	2.25E-3	0.4991024524
NC_009333	63313..63341	Peak	63328	29	0.0169050631	0.4932561768
NC_009333	63388..63444	Peak	63415	57	0.0644867604	0.4742913244
NC_009333	63636..63692	Peak	63672	57	0.3026791434	0.3810671969
NC_009333	63835..63872	Peak	63853	38	0.1865018419	0.4260256173
NC_009333	64191..64209	Peak	64205	19	2.25E-3	0.4991024524
NC_009333	64403..64467	Peak	64430	65	0.1173347225	0.4532974052
NC_009333	64603..64657	Peak	64631	55	0.2195039973	0.4131287332
NC_009333	64746..64810	Peak	64773	65	0.0930350137	0.4629378725
NC_009333	64825..64885	Peak	64866	61	0.0557277216	0.4777793576
NC_009333	65079..65115	Peak	65093	37	2.25E-3	0.4991024524
NC_009333	65331..65349	Peak	65332	19	0.0297596331	0.4881293763
NC_009333	65399..65407	Peak	65404	9	0.0237917759	0.49050935
NC_009333	65533..65574	Peak	65565	42	0.088675739	0.464669807
NC_009333	65605..65662	Peak	65645	58	0.0466437994	0.4813985616
NC_009333	65764..65784	Peak	65783	21	0.033186003	0.48676313
NC_009333	65904..65951	Peak	65917	48	0.1159616928	0.4538414508
NC_009333	66001..66049	Peak	66022	49	0.0861303859	0.4656813845
NC_009333	66224..66268	Peak	66230	45	0.0140877743	0.4943799771
NC_009333	66329..66382	Peak	66349	54	0.1739053286	0.4309699324
NC_009333	66463..66517	Peak	66493	55	0.291746569	0.3852402002
NC_009333	66571..66578	Peak	66577	8	0.0125051538	0.4950112954
NC_009333	66648..66685	Peak	66678	38	2.25E-3	0.4991024524
NC_009333	66888..66947	Peak	66923	60	0.1843822444	0.426856799
NC_009333	67002..67056	Peak	67039	55	0.1022990379	0.4592596595
NC_009333	67103..67174	Peak	67123	72	0.0464554599	0.4814736168
NC_009333	67183..67235	Peak	67222	53	0.097045755	0.4613450293
NC_009333	67354..67410	Peak	67379	57	0.2139387494	0.415297411
NC_009333	67639..67652	Peak	67639	14	8.064E-3	0.4967830734
NC_009333	67716..67769	Peak	67732	54	0.0686255762	0.47264383
NC_009333	67800..67859	Peak	67825	60	0.0783797707	0.4687629823
NC_009333	67914..67949	Peak	67936	36	0.0169050631	0.4932561768
NC_009333	67995..68049	Peak	68029	55	0.0609230237	0.4757102566
NC_009333	68341..68400	Peak	68379	60	1.010126374	0.1562173739
NC_009333	68605..68611	Peak	68608	7	9.443E-3	0.4962327976
NC_009333	68849..68894	Peak	68875	46	0.0687169951	0.472607445
NC_009333	68932..68985	Peak	68959	54	0.1952785544	0.4225874425
NC_009333	69033..69077	Peak	69055	45	0.0615621724	0.4754557509
NC_009333	69163..69182	Peak	69181	20	2.25E-3	0.4991024524
NC_009333	69345..69397	Peak	69379	53	0.2213325054	0.4124167709
NC_009333	69481..69530	Peak	69498	50	0.4337167627	0.3322470662
NC_009333	69672..69715	Peak	69702	44	0.0906309654	0.4638929132
NC_009333	69781..69786	Peak	69786	6	8.735E-4	0.49965152
NC_009333	70059..70118	Peak	70092	60	0.4660994989	0.320572141
NC_009333	70286..70321	Peak	70298	36	0.116574664	0.453598558
NC_009333	70469..70533	Peak	70516	65	0.1237694006	0.4507489301
NC_009333	70720..70723	Peak	70722	4	2.25E-3	0.4991024524
NC_009333	70930..70975	Peak	70945	46	0.18390299	0.4270447796
NC_009333	71150..71167	Peak	71159	18	0.0283881899	0.4886762717
NC_009333	71243..71253	Peak	71250	11	0.014719053	0.4941281595
NC_009333	71401..71455	Peak	71423	55	0.1398886804	0.4443739725
NC_009333	71483..71536	Peak	71518	54	0.1282449896	0.4489775487
NC_009333	71708..71761	Peak	71743	54	0.146025156	0.4419507648
NC_009333	71839..71868	Peak	71857	30	2.25E-3	0.4991024524
NC_009333	71997..72063	Peak	72037	67	0.2457419509	0.4029409978
NC_009333	72151..72212	Peak	72174	62	0.1279491792	0.4490945958
NC_009333	72248..72302	Peak	72275	55	0.2285791333	0.4095980222
NC_009333	72601..72647	Peak	72617	47	0.0737926721	0.470587679
NC_009333	72733..72746	Peak	72744	14	0.0474435095	0.4810798763
NC_009333	72857..72913	Peak	72883	57	0.3584995029	0.3599847699
NC_009333	73002..73014	Peak	73005	13	0.0354347688	0.4858665303
NC_009333	73138..73195	Peak	73165	58	0.1206627664	0.4519790758
NC_009333	73231..73291	Peak	73258	61	0.0884497185	0.4647596232
NC_009333	73437..73479	Peak	73458	43	0.0270535025	0.4892085304
NC_009333	73630..73690	Peak	73650	61	0.0914032662	0.4635860833
NC_009333	73777..73833	Peak	73801	57	2.25E-3	0.4991024524
NC_009333	74039..74098	Peak	74057	60	2.25E-3	0.4991024524
NC_009333	74181..74213	Peak	74198	33	0.0896980664	0.4642635763
NC_009333	74417..74455	Peak	74434	39	2.25E-3	0.4991024524
NC_009333	74557..74608	Peak	74568	52	2.25E-3	0.4991024524
NC_009333	74759..74802	Peak	74776	44	0.1238779886	0.4507059406
NC_009333	74852..74892	Peak	74873	41	0.1615240498	0.4358403355
NC_009333	74971..75028	Peak	74998	58	0.217836606	0.4137782109
NC_009333	75063..75108	Peak	75091	46	0.0215538695	0.4914019159
NC_009333	75207..75272	Peak	75246	66	0.357228555	0.3604603552
NC_009333	75309..75376	Peak	75352	68	0.1838076685	0.42708217
NC_009333	75514..75575	Peak	75540	62	0.3969602451	0.3456983885
NC_009333	75751..75778	Peak	75758	28	0.0126174048	0.4949665173
NC_009333	75830..75859	Peak	75846	30	0.0169050631	0.4932561768
NC_009333	75927..75979	Peak	75954	53	0.0387005036	0.4845645859
NC_009333	76007..76078	Peak	76025	72	0.0687169951	0.472607445
NC_009333	76085..76135	Peak	76102	51	0.1135015236	0.4548164776
NC_009333	76344..76401	Peak	76377	58	0.1932694698	0.4233739675
NC_009333	76417..76482	Peak	76456	66	0.0880508743	0.4649181207
NC_009333	76772..76835	Peak	76809	64	0.48172534	0.3150005362
NC_009333	77022..77077	Peak	77045	56	0.1353231578	0.4461781881
NC_009333	77614..77657	Peak	77628	44	0.0778105502	0.468989377
NC_009333	77830..77831	Peak	77830	2	8.095E-3	0.4967707725
NC_009333	78033..78092	Peak	78058	60	0.0604438308	0.4759010752
NC_009333	78467..78518	Peak	78478	52	0.0786100991	0.4686713773
NC_009333	78690..78691	Peak	78690	2	8.164E-3	0.4967428785
NC_009333	78761..78806	Peak	78798	46	0.1265836222	0.4496349801
NC_009333	78855..78865	Peak	78862	11	0.0276025381	0.4889895787
NC_009333	79154..79170	Peak	79157	17	0.0169050631	0.4932561768
NC_009333	79283..79326	Peak	79300	44	0.1033335783	0.4588491133
NC_009333	79396..79456	Peak	79404	61	0.0125856641	0.494979179
NC_009333	79472..79503	Peak	79490	32	0.0169050631	0.4932561768
NC_009333	79550..79609	Peak	79583	60	0.0783797707	0.4687629823
NC_009333	79792..79825	Peak	79812	34	2.25E-3	0.4991024524
NC_009333	80044..80092	Peak	80071	49	0.2187649791	0.4134165643
NC_009333	80205..80249	Peak	80210	45	0.0125856641	0.494979179
NC_009333	80328..80376	Peak	80363	49	0.1826893172	0.4275208992
NC_009333	80500..80558	Peak	80532	59	0.1429060978	0.4431821713
NC_009333	80724..80726	Peak	80726	3	2.25E-3	0.4991024524
NC_009333	81145..81187	Peak	81179	43	0.051089231	0.4796272086
NC_009333	81287..81337	Peak	81311	51	0.0610194644	0.4756718538
NC_009333	81473..81491	Peak	81476	19	2.25E-3	0.4991024524
NC_009333	81528..81557	Peak	81556	30	0.0169050631	0.4932561768
NC_009333	81629..81669	Peak	81638	41	0.0569379685	0.4772973044
NC_009333	81760..81822	Peak	81781	63	0.3412256504	0.3664668573
NC_009333	81952..81958	Peak	81954	7	0.0376405907	0.4849871221
NC_009333	82014..82033	Peak	82029	20	0.0405297485	0.4838353953
NC_009333	82262..82302	Peak	82278	41	0.0724590575	0.4711182936
NC_009333	82477..82530	Peak	82504	54	0.1571654073	0.4375572452
NC_009333	82636..82678	Peak	82653	43	0.0125856641	0.494979179
NC_009333	82760..82785	Peak	82769	26	2.25E-3	0.4991024524
NC_009333	82818..82837	Peak	82830	20	2.25E-3	0.4991024524
NC_009333	82892..82903	Peak	82900	12	0.0169050631	0.4932561768
NC_009333	82967..82986	Peak	82977	20	0.0530756592	0.4788358126
NC_009333	83159..83215	Peak	83189	57	0.1647905402	0.434554425
NC_009333	83453..83490	Peak	83463	38	0.0520400652	0.4792483846
NC_009333	83563..83570	Peak	83564	8	8.207E-3	0.4967258599
NC_009333	83625..83646	Peak	83638	22	0.057048283	0.4772533667
NC_009333	83938..83973	Peak	83947	36	0.0910579728	0.4637232634
NC_009333	84099..84157	Peak	84123	59	0.1135015236	0.4548164776
NC_009333	84299..84308	Peak	84305	10	2.25E-3	0.4991024524
NC_009333	84497..84550	Peak	84498	54	0.060803487	0.4757578566
NC_009333	84605..84651	Peak	84622	47	0.0779685529	0.468926534
NC_009333	84737..84800	Peak	84764	64	0.1827610154	0.4274927693
NC_009333	84838..84882	Peak	84871	45	0.0125856641	0.494979179
NC_009333	85008..85011	Peak	85009	4	2.82E-3	0.4988748824
NC_009333	85222..85268	Peak	85260	47	0.0544056148	0.4783060028
NC_009333	85313..85356	Peak	85342	44	0.0125856641	0.494979179
NC_009333	85623..85681	Peak	85661	59	0.6228969142	0.266676133
NC_009333	85751..85767	Peak	85754	17	0.0547086993	0.4781852693
NC_009333	85857..85865	Peak	85859	9	0.0319052863	0.4872737915
NC_009333	86066..86120	Peak	86092	55	0.2814075266	0.389198923
NC_009333	86174..86253	Peak	86227	80	0.4139397335	0.3394591219
NC_009333	86491..86550	Peak	86515	60	0.2228219892	0.4118370267
NC_009333	86666..86724	Peak	86703	59	0.2354500449	0.4069297237
NC_009333	87082..87147	Peak	87121	66	2.25E-3	0.4991024524
NC_009333	87199..87231	Peak	87226	33	2.25E-3	0.4991024524
NC_009333	87340..87370	Peak	87363	31	2.25E-3	0.4991024524
NC_009333	87623..87668	Peak	87624	46	2.25E-3	0.4991024524
NC_009333	87705..87753	Peak	87734	49	2.25E-3	0.4991024524
NC_009333	87792..87812	Peak	87811	21	2.25E-3	0.4991024524
NC_009333	87974..88027	Peak	87989	54	0.1190016659	0.452637018
NC_009333	88294..88350	Peak	88315	57	2.25E-3	0.4991024524
NC_009333	88532..88562	Peak	88545	31	0.1495570956	0.4405570301
NC_009333	88580..88623	Peak	88609	44	0.0951054212	0.462115546
NC_009333	88687..88693	Peak	88693	7	6.512E-3	0.4974022985
NC_009333	88747..88763	Peak	88751	17	2.25E-3	0.4991024524
NC_009333	89240..89304	Peak	89278	65	0.3414159967	0.3663952171
NC_009333	89306..89363	Peak	89359	58	0.0677548395	0.472990397
NC_009333	89442..89505	Peak	89487	64	0.2612817942	0.3969376026
NC_009333	89582..89647	Peak	89627	66	0.1734845351	0.4311352914
NC_009333	89897..89945	Peak	89925	49	0.0774897257	0.4691169822
NC_009333	90122..90170	Peak	90141	49	0.1581253688	0.4371790053
NC_009333	90537..90589	Peak	90553	53	0.0550460972	0.4780508696
NC_009333	90928..90973	Peak	90943	46	0.5043316283	0.3070141776
NC_009333	91108..91137	Peak	91124	30	0.0361717847	0.4855726919
NC_009333	91311..91357	Peak	91340	47	0.1583218718	0.4371015871
NC_009333	91432..91490	Peak	91471	59	0.4521006768	0.3255982281
NC_009333	91587..91637	Peak	91623	51	0.1939518345	0.4231067981
NC_009333	91731..91778	Peak	91747	48	0.1625400759	0.4354402859
NC_009333	91873..91930	Peak	91900	58	0.1929674921	0.4234922135
NC_009333	92075..92123	Peak	92107	49	0.1342427345	0.4466053172
NC_009333	92288..92352	Peak	92326	65	0.2856798656	0.3875616636
NC_009333	92482..92548	Peak	92522	67	0.1812141169	0.4280997572
NC_009333	92839..92846	Peak	92846	8	0.0118040765	0.4952909642
NC_009333	92936..92982	Peak	92950	47	0.0902219014	0.4640554402
NC_009333	93103..93158	Peak	93125	56	0.2845196153	0.388006102
NC_009333	93454..93481	Peak	93460	28	0.013107528	0.4947710026
NC_009333	93609..93666	Peak	93636	58	0.2572559221	0.3984906083
NC_009333	93847..93893	Peak	93860	47	0.5275506591	0.2989056233
NC_009333	94101..94115	Peak	94112	15	0.0327011873	0.4869564386
NC_009333	94209..94261	Peak	94237	53	0.1127221596	0.4551254162
NC_009333	94316..94332	Peak	94324	17	0.0234738926	0.4906361317
NC_009333	94492..94494	Peak	94494	3	0.0120368428	0.4951981104
NC_009333	94553..94578	Peak	94563	26	0.1435626183	0.4429229305
NC_009333	94843..94903	Peak	94869	61	0.2172592269	0.4140031652
NC_009333	95120..95161	Peak	95134	42	0.0649521874	0.4741060344
NC_009333	95210..95253	Peak	95238	44	0.1007332647	0.4598811021
NC_009333	95334..95391	Peak	95371	58	0.1329350692	0.4471223659
NC_009333	95455..95491	Peak	95478	37	0.0944801528	0.4623638738
NC_009333	95536..95590	Peak	95570	55	0.1634304707	0.4350897566
NC_009333	95652..95707	Peak	95679	56	0.1823684257	0.4276468015
NC_009333	95975..96034	Peak	95999	60	0.1135015236	0.4548164776
NC_009333	96215..96255	Peak	96224	41	0.0728665461	0.4709561577
NC_009333	96320..96353	Peak	96328	34	0.0437320621	0.4825589909
NC_009333	96594..96647	Peak	96604	54	2.25E-3	0.4991024524
NC_009333	96870..96916	Peak	96890	47	0.2390540335	0.4055318422
NC_009333	97046..97057	Peak	97053	12	9.193E-3	0.4963324924
NC_009333	97147..97203	Peak	97194	57	0.0169050631	0.4932561768
NC_009333	97282..97303	Peak	97287	22	0.0183361768	0.4926853337
NC_009333	97546..97601	Peak	97575	56	0.2364099649	0.4065572822
NC_009333	97760..97805	Peak	97773	46	0.0992867021	0.4604553182
NC_009333	97849..97908	Peak	97876	60	0.0902028531	0.4640630086
NC_009333	98016..98051	Peak	98027	36	0.0641707009	0.4744171533
NC_009333	98278..98280	Peak	98280	3	0.0134073687	0.494651394
NC_009333	98419..98440	Peak	98434	22	0.0626409274	0.475026219
NC_009333	98551	Peak	98551	1	2.392E-3	0.4990458835
NC_009333	98633..98668	Peak	98644	36	0.0619686045	0.475293917
NC_009333	98875..98935	Peak	98899	61	0.1355571178	0.4460857038
NC_009333	99038..99082	Peak	99068	45	0.1336868757	0.4468250918
NC_009333	99304..99366	Peak	99331	63	0.2977930172	0.3829305722
NC_009333	99503..99545	Peak	99513	43	0.1206105001	0.4519997758
NC_009333	99728..99736	Peak	99735	9	0.0169050631	0.4932561768
NC_009333	99817..99864	Peak	99843	48	0.0431653385	0.4827848676
NC_009333	99974..100034	Peak	99998	61	0.1135015236	0.4548164776
NC_009333	100281..100338	Peak	100312	58	0.0751263418	0.4700570946
NC_009333	100646..100700	Peak	100669	55	0.2008566882	0.4204053177
NC_009333	100830..100895	Peak	100857	66	0.1828696044	0.4274501664
NC_009333	100998..101046	Peak	101034	49	0.1419348976	0.4435657145
NC_009333	101144..101159	Peak	101145	16	2.25E-3	0.4991024524
NC_009333	101429..101488	Peak	101462	60	0.2595957314	0.3975878146
NC_009333	101710..101715	Peak	101713	6	2.25E-3	0.4991024524
NC_009333	101937..101979	Peak	101978	43	2.25E-3	0.4991024524
NC_009333	102140..102200	Peak	102174	61	0.2588995138	0.3978563867
NC_009333	102301..102352	Peak	102318	52	0.1563543074	0.4378768758
NC_009333	102437..102449	Peak	102439	13	2.25E-3	0.4991024524
NC_009333	102728..102747	Peak	102730	20	2.25E-3	0.4991024524
NC_009333	102804..102835	Peak	102809	32	2.25E-3	0.4991024524
NC_009333	102980..103039	Peak	103007	60	0.1567932197	0.4377039083
NC_009333	103127..103187	Peak	103151	61	0.1135015236	0.4548164776
NC_009333	103541..103601	Peak	103563	61	0.1343396893	0.4465669851
NC_009333	103774..103835	Peak	103816	62	0.1334368576	0.4469239489
NC_009333	103872..103929	Peak	103903	58	0.2303241109	0.4089199632
NC_009333	104106..104167	Peak	104133	62	0.0783797707	0.4687629823
NC_009333	104270..104276	Peak	104271	7	2.25E-3	0.4991024524
NC_009333	104562..104592	Peak	104576	31	0.0629406315	0.4749068898
NC_009333	104817..104863	Peak	104829	47	0.0125856641	0.494979179
NC_009333	104987..105047	Peak	105011	61	0.1135015236	0.4548164776
NC_009333	105449..105501	Peak	105464	53	2.25E-3	0.4991024524
NC_009333	105535..105612	Peak	105562	78	2.25E-3	0.4991024524
NC_009333	105628..105673	Peak	105658	46	2.25E-3	0.4991024524
NC_009333	105765..105789	Peak	105776	25	0.0169050631	0.4932561768
NC_009333	105842..105903	Peak	105869	62	0.0783797707	0.4687629823
NC_009333	106025..106087	Peak	106066	63	0.0783797707	0.4687629823
NC_009333	106213..106258	Peak	106246	46	0.0974020034	0.4612035769
NC_009333	106355..106363	Peak	106361	9	2.25E-3	0.4991024524
NC_009333	106509..106564	Peak	106533	56	0.5817075744	0.2803818344
NC_009333	106804..106865	Peak	106820	62	0.1211746736	0.4517763419
NC_009333	106990..107018	Peak	107006	29	2.25E-3	0.4991024524
NC_009333	107064..107078	Peak	107069	15	2.25E-3	0.4991024524
NC_009333	107256..107319	Peak	107293	64	0.1758699339	0.4301980632
NC_009333	107502..107527	Peak	107508	26	0.0143263164	0.4942848222
NC_009333	107714..107725	Peak	107723	12	2.25E-3	0.4991024524
NC_009333	107888..107923	Peak	107920	36	2.25E-3	0.4991024524
NC_009333	108061..108113	Peak	108108	53	2.25E-3	0.4991024524
NC_009333	108279..108308	Peak	108283	30	2.25E-3	0.4991024524
NC_009333	108488..108529	Peak	108508	42	2.25E-3	0.4991024524
NC_009333	108660..108714	Peak	108699	55	2.25E-3	0.4991024524
NC_009333	108876..108903	Peak	108883	28	0.0126174048	0.4949665173
NC_009333	109086..109115	Peak	109098	30	0.0398083314	0.484122967
NC_009333	109267..109327	Peak	109319	61	2.25E-3	0.4991024524
NC_009333	109527..109575	Peak	109562	49	2.25E-3	0.4991024524
NC_009333	109619..109663	Peak	109649	45	2.25E-3	0.4991024524
NC_009333	109890..109919	Peak	109905	30	2.25E-3	0.4991024524
NC_009333	110019..110065	Peak	110042	47	2.25E-3	0.4991024524
NC_009333	110109..110160	Peak	110156	52	2.25E-3	0.4991024524
NC_009333	110229..110253	Peak	110242	25	0.0500499873	0.4800412771
NC_009333	110336..110359	Peak	110347	24	0.0125856641	0.494979179
NC_009333	110636..110679	Peak	110672	44	2.25E-3	0.4991024524
NC_009333	110901..110926	Peak	110902	26	2.25E-3	0.4991024524
NC_009333	111011..111071	Peak	111035	61	0.1135015236	0.4548164776
NC_009333	111163..111247	Peak	111219	85	2.25E-3	0.4991024524
NC_009333	111261..111306	Peak	111280	46	2.25E-3	0.4991024524
NC_009333	111339..111374	Peak	111368	36	2.25E-3	0.4991024524
NC_009333	111421..111441	Peak	111428	21	0.0169050631	0.4932561768
NC_009333	111494..111555	Peak	111521	62	0.0783797707	0.4687629823
NC_009333	111654..111691	Peak	111678	38	0.0169050631	0.4932561768
NC_009333	111730..111797	Peak	111771	68	0.0783797707	0.4687629823
NC_009333	111891..111937	Peak	111907	47	0.2147625075	0.4149762427
NC_009333	112027..112069	Peak	112048	43	0.0270535025	0.4892085304
NC_009333	112332..112369	Peak	112356	38	0.0233654666	0.4906793756
NC_009333	112463..112467	Peak	112466	5	2.25E-3	0.4991024524
NC_009333	112667..112724	Peak	112694	58	0.1720503821	0.4316989602
NC_009333	112776..112791	Peak	112790	16	0.0218579234	0.4912806445
NC_009333	113130..113182	Peak	113154	53	0.0816784583	0.4674512044
NC_009333	113280..113298	Peak	113295	19	2.25E-3	0.4991024524
NC_009333	113528..113574	Peak	113547	47	2.25E-3	0.4991024524
NC_009333	113752..113756	Peak	113754	5	9.093E-3	0.496372356
NC_009333	113840..113851	Peak	113843	12	0.0245372012	0.4902120552
NC_009333	113919..113968	Peak	113922	50	2.25E-3	0.4991024524
NC_009333	114214..114269	Peak	114243	56	0.1315745319	0.4476604155
NC_009333	114398..114457	Peak	114433	60	0.2522720084	0.4004154113
NC_009333	114559..114606	Peak	114605	48	2.25E-3	0.4991024524
NC_009333	114654..114689	Peak	114661	36	2.25E-3	0.4991024524
NC_009333	114785..114835	Peak	114814	51	0.3630683482	0.3582769141
NC_009333	115011..115066	Peak	115033	56	0.188054719	0.4254168784
NC_009333	115226..115254	Peak	115235	29	0.058475545	0.4766849207
NC_009333	115664..115735	Peak	115688	72	0.0783797707	0.4687629823
NC_009333	115916..115951	Peak	115931	36	2.25E-3	0.4991024524
NC_009333	116036..116086	Peak	116048	51	2.25E-3	0.4991024524
NC_009333	116215..116233	Peak	116225	19	0.0358839165	0.4856874602
NC_009333	116347..116388	Peak	116366	42	0.0858795301	0.465781092
NC_009333	116770..116817	Peak	116786	48	0.0680617271	0.4728682485
NC_009333	116868..116927	Peak	116891	60	0.0125856641	0.494979179
NC_009333	117070..117112	Peak	117084	43	0.0584728295	0.4766860022
NC_009333	117356..117418	Peak	117401	63	2.25E-3	0.4991024524
NC_009333	117523..117558	Peak	117532	36	0.157610063	0.4373820368
NC_009333	117645..117680	Peak	117653	36	0.1043980681	0.4584267279
NC_009333	117951..118016	Peak	117990	66	0.9142750207	0.1802861763
NC_009333	118084..118127	Peak	118097	44	0.0985008497	0.4607672986
NC_009333	118300..118356	Peak	118303	57	2.25E-3	0.4991024524
NC_009333	118426..118494	Peak	118448	69	2.25E-3	0.4991024524
NC_009333	118545..118577	Peak	118555	33	2.25E-3	0.4991024524
NC_009333	118642..118718	Peak	118665	77	2.25E-3	0.4991024524
NC_009333	118724..118748	Peak	118747	25	2.25E-3	0.4991024524
NC_009333	118792..118838	Peak	118825	47	2.25E-3	0.4991024524
NC_009333	118895..118936	Peak	118932	42	2.25E-3	0.4991024524
NC_009333	119101..119109	Peak	119109	9	2.25E-3	0.4991024524
NC_009333	119305..119329	Peak	119328	25	2.25E-3	0.4991024524
NC_009333	119653..119697	Peak	119668	45	0.4869989518	0.3131295369
NC_009333	119936..120001	Peak	119977	66	0.1711979566	0.4320340571
NC_009333	120079..120124	Peak	120096	46	0.0613499618	0.475540251
NC_009333	120365..120429	Peak	120411	65	0.2019815526	0.4199655729
NC_009333	120670..120709	Peak	120690	40	2.25E-3	0.4991024524
NC_009333	120831..120895	Peak	120855	65	0.1135015236	0.4548164776
NC_009333	120993..121018	Peak	120998	26	0.0570145192	0.4772668147
NC_009333	121180..121214	Peak	121188	35	0.0566774645	0.4774010629
NC_009333	121528..121574	Peak	121545	47	0.0811759668	0.4676510061
NC_009333	121934..121984	Peak	121953	51	0.3160248001	0.3759918422
NC_009333	122188..122244	Peak	122211	57	0.1112185225	0.455721532
NC_009333	122478..122527	Peak	122484	50	0.0277627709	0.4889256795
NC_009333	122558..122593	Peak	122577	36	0.0501166813	0.4800147033
NC_009333	122779..122843	Peak	122820	65	2.25E-3	0.4991024524
NC_009333	122966..123027	Peak	123010	62	0.6256501652	0.2657722136
NC_009333	123134..123190	Peak	123146	57	2.25E-3	0.4991024524
NC_009333	123371..123431	Peak	123395	61	0.2237876081	0.4114612864
NC_009333	123473..123514	Peak	123486	42	0.0748718353	0.4701583429
NC_009333	123715..123756	Peak	123743	42	0.1398695734	0.4443815209
NC_009333	123832..123833	Peak	123833	2	8.735E-4	0.49965152
NC_009333	124107..124152	Peak	124132	46	0.2395168635	0.4053524109
NC_009333	124198..124259	Peak	124225	62	0.3777350757	0.3528137041
NC_009333	124418..124485	Peak	124445	68	0.0888417904	0.4646038225
NC_009333	124728..124732	Peak	124732	5	0.0154651819	0.493830531
NC_009333	125451..125487	Peak	125456	37	0.0732764192	0.470793078
NC_009333	125695..125731	Peak	125725	37	2.25E-3	0.4991024524
NC_009333	125893..125937	Peak	125927	45	2.25E-3	0.4991024524
NC_009333	125972..126036	Peak	126024	65	2.25E-3	0.4991024524
NC_009333	126140..126165	Peak	126156	26	0.0748110266	0.4701825342
NC_009333	126258..126301	Peak	126287	44	0.8098272183	0.2090197434
NC_009333	126411..126464	Peak	126431	54	0.5448243126	0.2929371778
NC_009333	126558..126563	Peak	126558	6	0.0345444516	0.4862214981
NC_009333	126778..126839	Peak	126805	62	0.0783797707	0.4687629823
NC_009333	127190..127222	Peak	127196	33	2.25E-3	0.4991024524
NC_009333	127352..127390	Peak	127383	39	0.0528594189	0.4789219591
NC_009333	127754..127759	Peak	127759	6	0.0272346967	0.489136271
NC_009333	127874..127896	Peak	127878	23	0.0461446009	0.4815974987
NC_009333	128009..128072	Peak	128032	64	0.2085834877	0.417386701
NC_009333	128157..128194	Peak	128175	38	0.056012676	0.4776658545
NC_009333	128317..128355	Peak	128330	39	2.25E-3	0.4991024524
NC_009333	128662..128710	Peak	128686	49	0.0770034176	0.4693104131
NC_009333	128897..128918	Peak	128905	22	0.0169050631	0.4932561768
NC_009333	128971..129032	Peak	128998	62	0.0783797707	0.4687629823
NC_009333	129159..129205	Peak	129168	47	2.25E-3	0.4991024524
NC_009333	129398..129454	Peak	129437	57	0.136514208	0.4457073967
NC_009333	129533..129589	Peak	129560	57	0.3004491115	0.3819173037
NC_009333	129852..129923	Peak	129897	72	0.9904476686	0.1609776779
NC_009333	129992..130046	Peak	130010	55	0.1009707675	0.4597868328
NC_009333	130267..130310	Peak	130284	44	0.2370216147	0.4063200109
NC_009333	130420..130432	Peak	130430	13	2.25E-3	0.4991024524
NC_009333	130620..130678	Peak	130647	59	0.4027563922	0.3435637221
NC_009333	131169..131170	Peak	131169	2	8.002E-3	0.4968076751
NC_009333	131261..131289	Peak	131277	29	0.0262035141	0.4895475065
NC_009333	131382..131420	Peak	131395	39	2.25E-3	0.4991024524
NC_009333	131503..131535	Peak	131522	33	2.25E-3	0.4991024524
NC_009333	131847..131907	Peak	131871	61	0.1135015236	0.4548164776
NC_009333	132111..132164	Peak	132117	54	2.25E-3	0.4991024524
NC_009333	132317..132363	Peak	132330	47	0.099823596	0.4602421874
NC_009333	132653..132657	Peak	132653	5	2.25E-3	0.4991024524
NC_009333	132830..132880	Peak	132852	51	2.25E-3	0.4991024524
NC_009333	132981..133015	Peak	133006	35	2.25E-3	0.4991024524
NC_009333	133060..133116	Peak	133085	57	2.25E-3	0.4991024524
NC_009333	133172..133223	Peak	133203	52	2.25E-3	0.4991024524
NC_009333	133438..133453	Peak	133443	16	2.25E-3	0.4991024524
NC_009333	133568	Peak	133568	1	5.161E-4	0.4997940878
NC_009333	133694..133732	Peak	133731	39	2.25E-3	0.4991024524
NC_009333	133923..133985	Peak	133945	63	0.0982225998	0.4608777686
NC_009333	134000..134064	Peak	134038	65	0.2388656476	0.4056048819
NC_009333	134383..134438	Peak	134400	56	0.1817307829	0.4278970035
NC_009333	134530..134588	Peak	134562	59	0.0879340271	0.4649645558
NC_009333	134617..134645	Peak	134629	29	0.0735512396	0.4706837356
NC_009333	134779..134827	Peak	134793	49	0.095911461	0.461795446
NC_009333	134958..135017	Peak	134983	60	0.1295727247	0.4484522419
NC_009333	135085..135148	Peak	135123	64	0.1641887845	0.434791265
NC_009333	135264..135320	Peak	135294	57	1.1147426491	0.1324803595
NC_009333	135457..135532	Peak	135507	76	0.6091655202	0.2712073661
NC_009333	135686..135691	Peak	135687	6	0.0510396246	0.4796469729
NC_009333	135777..135802	Peak	135785	26	0.0624968537	0.4750835837
NC_009333	135919..135986	Peak	135960	68	0.632003079	0.2636924326
NC_009333	136080..136128	Peak	136102	49	0.1824051557	0.42763239
NC_009333	136372..136430	Peak	136392	59	0.3563398201	0.3607930459
NC_009333	136554..136610	Peak	136585	57	0.5493040183	0.2913984151
NC_009333	136843..136918	Peak	136869	76	0.3346938771	0.3689280104
NC_009333	136983..137017	Peak	136994	35	0.1692584557	0.432796676
NC_009333	137090..137155	Peak	137131	66	0.656571209	0.2557283332
NC_009333	137338..137383	Peak	137355	46	0.1247314941	0.4503680617
NC_009333	137468..137510	Peak	137469	43	2.25E-3	0.4991024524
NC_009333	137585..137633	Peak	137610	49	2.25E-3	0.4991024524
NC_009333	137766..137824	Peak	137805	59	2.25E-3	0.4991024524
NC_009333	137919..137952	Peak	137930	34	2.25E-3	0.4991024524
